# Supplementary material
Source: publisher site journal article supplement (http://www.spandidos-publications.com/3954/downloadSupplementary)
Supplement: Supplementary file 1 [file downloadSupplementary]

## Sheet: OVC_vs_OV_real_DEGs
Table SVII. Differentially expressed genes between OVC and healthy OVgroups.
ID	Group A	Group B	baseMeanA	baseMeanB	baseMean	log2(fold change)	lfcSE	Stat	P-value	Adjusted P-value
TRINITY_DN2062_c0_g1	OVC	OV	4338.39	1007.61	3228.13	2.10595	0.117478	17.9264	7.34×10^-72	5.27×10^-67
TRINITY_DN48919_c0_g1	OVC	OV	799.789	88.4373	562.672	3.17596	0.193298	16.4303	1.16×10^-60	4.16×10^-56
TRINITY_DN3753_c0_g2	OVC	OV	3533.5	1212.56	2759.85	1.54304	0.0979135	15.7592	5.94×10^-56	1.42×10^-51
TRINITY_DN1549_c2_g1	OVC	OV	1597.03	323.865	1172.64	2.3015	0.146692	15.6893	1.79×10^-55	3.21×10^-51
TRINITY_DN4049_c0_g3	OVC	OV	861.758	143.31	622.275	2.58761	0.166952	15.4991	3.52×10^-54	5.05×10^-50
TRINITY_DN293_c0_g1	OVC	OV	4330.69	542.405	3067.93	2.99697	0.195161	15.3564	3.21×10^-53	3.84×10^-49
TRINITY_DN958_c0_g2	OVC	OV	5482.16	2001.29	4321.87	1.45356	0.0960792	15.1288	1.05×10^-51	1.07×10^-47
TRINITY_DN1487_c1_g2	OVC	OV	607.54	138.678	451.253	2.13248	0.144796	14.7275	4.29×10^-49	3.85×10^-45
TRINITY_DN983_c3_g1	OVC	OV	316	1225.45	619.151	-1.95567	0.134973	-14.4893	1.42×10^-47	1.13×10^-43
TRINITY_DN14489_c0_g1	OVC	OV	1447.03	266.873	1053.64	2.43913	0.170819	14.279	2.96×10^-46	2.12×10^-42
TRINITY_DN2229_c2_g1	OVC	OV	1428.35	516.503	1124.4	1.46679	0.103892	14.1184	2.93×10^-45	1.91×10^-41
TRINITY_DN332_c6_g1	OVC	OV	2279.03	506.629	1688.23	2.16906	0.158424	13.6915	1.14×10^-42	6.83×10^-39
TRINITY_DN2005_c0_g1	OVC	OV	13615	327.03	9185.67	5.37968	0.399251	13.4744	2.21×10^-41	1.22×10^-37
TRINITY_DN2479_c1_g1	OVC	OV	2299.84	730.323	1776.67	1.65524	0.123192	13.4363	3.71×10^-41	1.90×10^-37
TRINITY_DN9535_c0_g1	OVC	OV	3331.21	302.035	2321.49	3.46303	0.267871	12.928	3.13×10^-38	1.50×10^-34
TRINITY_DN3029_c0_g1	OVC	OV	6725.31	1238.74	4896.45	2.44078	0.188959	12.917	3.61×10^-38	1.62×10^-34
TRINITY_DN22807_c0_g1	OVC	OV	1897.15	414.623	1402.97	2.19435	0.171171	12.8196	1.27×10^-37	5.38×10^-34
TRINITY_DN25228_c0_g1	OVC	OV	34.2744	660.069	242.873	-4.2699	0.334158	-12.7781	2.17×10^-37	8.67×10^-34
TRINITY_DN1271_c0_g1	OVC	OV	2947.68	1299.11	2398.16	1.18256	0.0927257	12.7533	2.99×10^-37	1.13×10^-33
TRINITY_DN3161_c0_g2	OVC	OV	18055.5	6277.08	14129.3	1.52432	0.1197	12.7345	3.80×10^-37	1.36×10^-33
TRINITY_DN11371_c1_g1	OVC	OV	3129.25	964.934	2407.81	1.69708	0.133375	12.7241	4.34×10^-37	1.48×10^-33
TRINITY_DN32531_c0_g1	OVC	OV	27699.2	2780.33	19392.9	3.31654	0.268144	12.3685	3.87×10^-35	1.26×10^-31
TRINITY_DN420_c1_g1	OVC	OV	1755.8	3848.53	2453.38	-1.13269	0.0917439	-12.3463	5.10×10^-35	1.59×10^-31
TRINITY_DN1793_c0_g1	OVC	OV	33.8979	443.182	170.326	-3.72399	0.30189	-12.3356	5.83×10^-35	1.74×10^-31
TRINITY_DN6592_c1_g1	OVC	OV	1508.05	579.384	1198.49	1.38021	0.111952	12.3286	6.35×10^-35	1.82×10^-31
TRINITY_DN13357_c0_g1	OVC	OV	1154.25	102.241	803.583	3.49728	0.284894	12.2757	1.22×10^-34	3.38×10^-31
TRINITY_DN768_c0_g1	OVC	OV	2776.15	74.765	1875.69	5.21478	0.424997	12.2702	1.31×10^-34	3.48×10^-31
TRINITY_DN1578_c5_g1	OVC	OV	1753.77	380.874	1296.14	2.20324	0.179818	12.2526	1.63×10^-34	4.17×10^-31
TRINITY_DN22213_c0_g1	OVC	OV	15831.9	3434.52	11699.5	2.20462	0.180353	12.2239	2.32×10^-34	5.74×10^-31
TRINITY_DN6023_c1_g2	OVC	OV	3580.47	1075.5	2745.48	1.73517	0.144667	11.9942	3.81×10^-33	8.83×10^-30
TRINITY_DN2303_c0_g1	OVC	OV	885.082	50.2704	606.812	4.1379	0.345693	11.9699	5.11×10^-33	1.15×10^-29
TRINITY_DN1550_c0_g1	OVC	OV	3962.53	209.202	2711.42	4.24334	0.354821	11.9591	5.82×10^-33	1.27×10^-29
TRINITY_DN4754_c0_g1	OVC	OV	1382.38	7750.81	3505.19	-2.48784	0.209251	-11.8893	1.35×10^-32	2.79×10^-29
TRINITY_DN563_c0_g1	OVC	OV	160.773	853.989	391.845	-2.4095	0.202677	-11.8883	1.36×10^-32	2.79×10^-29
TRINITY_DN2587_c0_g1	OVC	OV	979.688	217.361	725.579	2.17097	0.18269	11.8834	1.44×10^-32	2.88×10^-29
TRINITY_DN5042_c0_g1	OVC	OV	6257.74	452.701	4322.73	3.78911	0.321956	11.769	5.64×10^-32	1.09×10^-28
TRINITY_DN2169_c0_g1	OVC	OV	2406.04	663.266	1825.12	1.85845	0.160042	11.6123	3.57×10^-31	6.75×10^-28
TRINITY_DN7848_c0_g1	OVC	OV	633.445	113.499	460.13	2.47905	0.214655	11.549	7.47×10^-31	1.38×10^-27
TRINITY_DN6622_c0_g1	OVC	OV	4894.9	407.907	3399.23	3.58484	0.31154	11.5068	1.22×10^-30	2.19×10^-27
TRINITY_DN3466_c0_g1	OVC	OV	1141.88	123.386	802.38	3.20951	0.281729	11.3922	4.57×10^-30	8.01×10^-27
TRINITY_DN2023_c2_g1	OVC	OV	1919.18	165.146	1334.5	3.5389	0.310743	11.3885	4.77×10^-30	8.15×10^-27
TRINITY_DN6719_c0_g1	OVC	OV	9264.66	775.384	6434.9	3.57884	0.316645	11.3024	1.28×10^-29	2.13×10^-26
TRINITY_DN47177_c0_g1	OVC	OV	0	3688.92	1229.64	-14.0295	1.24306	-11.2862	1.53×10^-29	2.50×10^-26
TRINITY_DN1363_c0_g1	OVC	OV	2220.28	292.236	1577.6	2.9253	0.261145	11.2018	3.99×10^-29	6.37×10^-26
TRINITY_DN1049_c1_g1	OVC	OV	455.902	53.6716	321.825	3.08713	0.277929	11.1076	1.15×10^-28	1.80×10^-25
TRINITY_DN2801_c1_g4	OVC	OV	525.598	43.7554	364.984	3.58488	0.324061	11.0624	1.91×10^-28	2.88×10^-25
TRINITY_DN4008_c1_g1	OVC	OV	46.9784	642.435	245.464	-3.76385	0.340261	-11.0617	1.92×10^-28	2.88×10^-25
TRINITY_DN1264_c2_g1	OVC	OV	3459.95	1366.33	2762.08	1.34088	0.121558	11.0308	2.72×10^-28	3.98×10^-25
TRINITY_DN5034_c0_g2	OVC	OV	32697.7	14990.8	26795.4	1.12506	0.102276	11.0002	3.81×10^-28	5.47×10^-25
TRINITY_DN1819_c0_g1	OVC	OV	6.88698	495.396	169.723	-6.17748	0.566929	-10.8964	1.20×10^-27	1.69×10^-24
TRINITY_DN319_c1_g2	OVC	OV	90.9704	766.185	316.042	-3.08344	0.285459	-10.8017	3.38×10^-27	4.67×10^-24
TRINITY_DN6048_c0_g1	OVC	OV	791.764	22.102	535.21	5.16266	0.479003	10.7779	4.38×10^-27	5.93×10^-24
TRINITY_DN8545_c0_g1	OVC	OV	871.613	306.629	683.285	1.50776	0.140389	10.7399	6.61×10^-27	8.79×10^-24
TRINITY_DN88_c1_g2	OVC	OV	3904.86	1038.76	2949.49	1.91044	0.178135	10.7246	7.80×10^-27	1.02×10^-23
TRINITY_DN14833_c0_g1	OVC	OV	1199.26	174.68	857.735	2.77912	0.263995	10.5272	6.47×10^-26	8.30×10^-23
TRINITY_DN1601_c0_g1	OVC	OV	673.868	49.5125	465.749	3.76589	0.361219	10.4255	1.90×10^-25	2.39×10^-22
TRINITY_DN4862_c0_g1	OVC	OV	931.353	61.8521	641.52	3.91169	0.375435	10.4191	2.03×10^-25	2.51×10^-22
TRINITY_DN7256_c0_g2	OVC	OV	4651.93	1033.86	3445.91	2.16988	0.209737	10.3457	4.38×10^-25	5.33×10^-22
TRINITY_DN2218_c0_g1	OVC	OV	1595.13	61.7041	1083.99	4.69251	0.454575	10.3229	5.55×10^-25	6.65×10^-22
TRINITY_DN39769_c0_g1	OVC	OV	0	1923.66	641.219	-13.0902	1.27067	-10.3017	6.92×10^-25	8.15×10^-22
TRINITY_DN27516_c1_g1	OVC	OV	3714.71	615.149	2681.53	2.59411	0.252486	10.2743	9.20×10^-25	1.07×10^-21
TRINITY_DN78555_c1_g1	OVC	OV	0	1750.46	583.486	-12.954	1.26193	-10.2653	1.01×10^-24	1.15×10^-21
TRINITY_DN588_c1_g1	OVC	OV	348.142	102.227	266.17	1.76941	0.173696	10.1868	2.27×10^-24	2.55×10^-21
TRINITY_DN1264_c3_g1	OVC	OV	2724.95	966.399	2138.77	1.49568	0.146861	10.1843	2.33×10^-24	2.57×10^-21
TRINITY_DN1768_c3_g4	OVC	OV	4212.08	1668.26	3364.14	1.33611	0.131304	10.1757	2.55×10^-24	2.77×10^-21
TRINITY_DN17239_c0_g1	OVC	OV	147.97	25.1352	107.025	2.55686	0.251879	10.1511	3.27×10^-24	3.51×10^-21
TRINITY_DN10096_c1_g1	OVC	OV	1539.02	98.4796	1058.84	3.96601	0.391579	10.1282	4.14×10^-24	4.37×10^-21
TRINITY_DN2882_c0_g1	OVC	OV	496.954	27.4178	340.442	4.18059	0.414993	10.0739	7.21×10^-24	7.50×10^-21
TRINITY_DN78527_c0_g1	OVC	OV	5882.14	1082.9	4282.39	2.44153	0.243759	10.0162	1.29×10^-23	1.33×10^-20
TRINITY_DN669_c0_g1	OVC	OV	7022.84	2287.94	5444.54	1.61782	0.161831	9.99697	1.57×10^-23	1.59×10^-20
TRINITY_DN22853_c0_g2	OVC	OV	349.261	9.03372	235.852	5.27094	0.528989	9.96418	2.19×10^-23	2.18×10^-20
TRINITY_DN2826_c0_g1	OVC	OV	1327.13	203.018	952.427	2.70855	0.272883	9.92567	3.22×10^-23	3.12×10^-20
TRINITY_DN306_c1_g1	OVC	OV	3204.69	1496.29	2635.23	1.09858	0.11119	9.88016	5.08×10^-23	4.86×10^-20
TRINITY_DN13806_c1_g1	OVC	OV	5702.82	2817.05	4740.9	1.01761	0.103698	9.81322	9.88×10^-23	9.33×10^-20
TRINITY_DN4739_c2_g3	OVC	OV	1379.68	581.027	1113.46	1.24781	0.127362	9.79735	1.16×10^-22	1.08×10^-19
TRINITY_DN3230_c0_g1	OVC	OV	90.0879	397.069	192.415	-2.13672	0.218226	-9.79132	1.23×10^-22	1.13×10^-19
TRINITY_DN11164_c0_g1	OVC	OV	1208.46	416.27	944.396	1.53712	0.157453	9.76237	1.63×10^-22	1.48×10^-19
TRINITY_DN297_c4_g1	OVC	OV	6328.64	1795.42	4817.57	1.81757	0.187519	9.69271	3.24×10^-22	2.91×10^-19
TRINITY_DN3672_c5_g1	OVC	OV	87.9364	414.702	196.858	-2.22991	0.230555	-9.67191	3.97×10^-22	3.52×10^-19
TRINITY_DN1018_c0_g1	OVC	OV	1993.39	880.524	1622.44	1.1793	0.122055	9.6621	4.37×10^-22	3.82×10^-19
TRINITY_DN443_c2_g1	OVC	OV	954.59	420.188	776.456	1.18463	0.122978	9.63283	5.81×10^-22	5.03×10^-19
TRINITY_DN11348_c1_g1	OVC	OV	2.47612	570.934	191.962	-7.89168	0.81981	-9.62623	6.20×10^-22	5.30×10^-19
TRINITY_DN2367_c2_g1	OVC	OV	66.3803	312.844	148.535	-2.23948	0.233192	-9.60359	7.72×10^-22	6.52×10^-19
TRINITY_DN2610_c4_g1	OVC	OV	17.2563	253.031	95.8478	-3.85337	0.402609	-9.571	1.06×10^-21	8.83×10^-19
TRINITY_DN5705_c0_g1	OVC	OV	0	1095.15	365.051	-12.2774	1.28292	-9.56988	1.07×10^-21	8.83×10^-19
TRINITY_DN1900_c1_g1	OVC	OV	3359.48	1432.79	2717.25	1.2294	0.128529	9.5651	1.12×10^-21	9.15×10^-19
TRINITY_DN35264_c0_g1	OVC	OV	482.116	72.9911	345.741	2.72191	0.287172	9.47832	2.58×10^-21	2.08×10^-18
TRINITY_DN4075_c1_g1	OVC	OV	137.657	1292.7	522.67	-3.23136	0.341162	-9.4716	2.76×10^-21	2.20×10^-18
TRINITY_DN5886_c0_g1	OVC	OV	710.372	99.5322	506.759	2.83657	0.299936	9.45726	3.16×10^-21	2.49×10^-18
TRINITY_DN103254_c3_g1	OVC	OV	2903.2	728.618	2178.34	1.99469	0.211344	9.43814	3.79×10^-21	2.96×10^-18
TRINITY_DN11165_c0_g1	OVC	OV	2473.61	408.113	1785.11	2.59983	0.276308	9.40916	5.00×10^-21	3.82×10^-18
TRINITY_DN1963_c0_g2	OVC	OV	137.694	654.791	310.06	-2.2512	0.239256	-9.40913	5.00×10^-21	3.82×10^-18
TRINITY_DN4338_c1_g1	OVC	OV	416.189	37.5115	289.963	3.47224	0.369649	9.39336	5.81×10^-21	4.39×10^-18
TRINITY_DN497_c1_g1	OVC	OV	715.724	177.544	536.331	2.00998	0.214459	9.37235	7.09×10^-21	5.31×10^-18
TRINITY_DN561_c3_g2	OVC	OV	992.976	256.633	747.529	1.95262	0.208943	9.34525	9.17×10^-21	6.79×10^-18
TRINITY_DN38091_c0_g1	OVC	OV	1.13883	438.097	146.792	-8.53813	0.914846	-9.33286	1.03×10^-20	7.55×10^-18
TRINITY_DN640_c1_g2	OVC	OV	4031.17	1832.39	3298.25	1.13728	0.121904	9.32931	1.07×10^-20	7.73×10^-18
TRINITY_DN3961_c0_g1	OVC	OV	518.918	216.934	418.257	1.25832	0.135271	9.3022	1.38×10^-20	9.88×10^-18
TRINITY_DN2108_c0_g1	OVC	OV	9668.35	2742.02	7359.57	1.81796	0.195491	9.29942	1.41×10^-20	1.00×10^-17
TRINITY_DN14780_c0_g1	OVC	OV	5.29367	174.297	61.6282	-5.03509	0.541849	-9.29242	1.51×10^-20	1.06×10^-17
TRINITY_DN2850_c1_g2	OVC	OV	1689.08	606.457	1328.21	1.47838	0.159256	9.28304	1.65×10^-20	1.15×10^-17
TRINITY_DN2747_c2_g3	OVC	OV	95.8268	722.909	304.854	-2.9234	0.315415	-9.26842	1.89×10^-20	1.30×10^-17
TRINITY_DN800_c0_g2	OVC	OV	447.143	56.5876	316.958	2.98102	0.322114	9.25454	2.15×10^-20	1.46×10^-17
TRINITY_DN2447_c0_g2	OVC	OV	16513.2	4040.93	12355.8	2.03081	0.2201	9.22676	2.79×10^-20	1.87×10^-17
TRINITY_DN44199_c0_g1	OVC	OV	34.8551	1018.06	362.589	-4.86597	0.529465	-9.19036	3.92×10^-20	2.60×10^-17
TRINITY_DN491_c2_g3	OVC	OV	855.963	266.718	659.548	1.68098	0.183666	9.15236	5.57×10^-20	3.64×10^-17
TRINITY_DN874_c4_g1	OVC	OV	1314.51	104.612	911.213	3.65168	0.401405	9.09723	9.27×10^-20	5.94×10^-17
TRINITY_DN20709_c0_g2	OVC	OV	0	888.197	296.066	-11.9753	1.31703	-9.09263	9.67×10^-20	6.14×10^-17
TRINITY_DN18755_c0_g1	OVC	OV	416.393	23.1326	285.306	4.16875	0.458796	9.08629	1.02×10^-19	6.45×10^-17
TRINITY_DN14153_c0_g1	OVC	OV	134.512	532.053	267.026	-1.98625	0.219207	-9.06109	1.29×10^-19	8.06×10^-17
TRINITY_DN72414_c0_g1	OVC	OV	305.512	3.37189	204.799	6.50582	0.71976	9.03888	1.58×10^-19	9.80×10^-17
TRINITY_DN1542_c0_g4	OVC	OV	1426.8	327.444	1060.35	2.12401	0.235527	9.01812	1.91×10^-19	1.17×10^-16
TRINITY_DN981_c0_g1	OVC	OV	271.231	52.0004	198.154	2.38456	0.264525	9.01452	1.98×10^-19	1.20×10^-16
TRINITY_DN2883_c1_g1	OVC	OV	215.64	593.159	341.48	-1.4617	0.162452	-8.9977	2.31×10^-19	1.39×10^-16
TRINITY_DN10345_c1_g1	OVC	OV	317.869	81.0382	238.926	1.97342	0.221132	8.92417	4.49×10^-19	2.69×10^-16
TRINITY_DN1598_c1_g2	OVC	OV	70.9017	335.226	159.01	-2.24338	0.251659	-8.91437	4.91×10^-19	2.91×10^-16
TRINITY_DN1390_c2_g3	OVC	OV	2989.87	385.172	2121.63	2.9564	0.331953	8.90608	5.29×10^-19	3.10×10^-16
TRINITY_DN3810_c2_g1	OVC	OV	962.076	192.291	705.481	2.32326	0.260874	8.90569	5.31×10^-19	3.10×10^-16
TRINITY_DN148_c2_g1	OVC	OV	38.8532	261.116	112.941	-2.76318	0.310723	-8.89275	5.96×10^-19	3.45×10^-16
TRINITY_DN2469_c0_g1	OVC	OV	499.524	173.797	390.949	1.52136	0.171796	8.85564	8.32×10^-19	4.78×10^-16
TRINITY_DN6134_c3_g1	OVC	OV	0	1102.42	367.474	-12.287	1.38895	-8.84622	9.05×10^-19	5.16×10^-16
TRINITY_DN125_c1_g1	OVC	OV	2983.57	971.782	2312.98	1.61854	0.183286	8.83068	1.04×10^-18	5.88×10^-16
TRINITY_DN7523_c0_g1	OVC	OV	1405.43	363.651	1058.17	1.95114	0.221897	8.79297	1.46×10^-18	8.17×10^-16
TRINITY_DN4626_c1_g1	OVC	OV	1652.34	168.739	1157.81	3.29186	0.374929	8.77996	1.64×10^-18	9.10×10^-16
TRINITY_DN1549_c1_g1	OVC	OV	3046.28	326.382	2139.65	3.22227	0.367051	8.77881	1.65×10^-18	9.13×10^-16
TRINITY_DN94714_c0_g1	OVC	OV	129.655	22.124	93.8111	2.55313	0.290883	8.77716	1.68×10^-18	9.19×10^-16
TRINITY_DN4997_c0_g2	OVC	OV	554.033	79.7055	395.924	2.79727	0.318863	8.77265	1.75×10^-18	9.49×10^-16
TRINITY_DN1118_c0_g1	OVC	OV	2677.36	1291.21	2215.31	1.05182	0.119993	8.76569	1.86×10^-18	1.00×10^-15
TRINITY_DN2265_c5_g1	OVC	OV	76.2684	262.971	138.502	-1.79034	0.204817	-8.74116	2.31×10^-18	1.24×10^-15
TRINITY_DN4486_c0_g1	OVC	OV	1465.67	549.178	1160.17	1.41539	0.161949	8.73973	2.34×10^-18	1.24×10^-15
TRINITY_DN1844_c1_g2	OVC	OV	3171.21	1074.55	2472.33	1.56091	0.178978	8.7212	2.75×10^-18	1.45×10^-15
TRINITY_DN943_c0_g1	OVC	OV	2262.3	5459.97	3328.19	-1.27159	0.146285	-8.69259	3.54×10^-18	1.86×10^-15
TRINITY_DN10087_c0_g1	OVC	OV	13738.5	7.06777	9161.33	10.9253	1.25893	8.67825	4.02×10^-18	2.09×10^-15
TRINITY_DN5545_c0_g2	OVC	OV	2528.6	582.016	1879.74	2.11891	0.244378	8.67064	4.30×10^-18	2.22×10^-15
TRINITY_DN13281_c1_g1	OVC	OV	1941.03	4983.55	2955.2	-1.36051	0.156921	-8.67003	4.32×10^-18	2.22×10^-15
TRINITY_DN9222_c0_g1	OVC	OV	987.382	428.205	800.99	1.20427	0.140042	8.59934	8.02×10^-18	4.08×10^-15
TRINITY_DN840_c0_g1	OVC	OV	724.045	277.489	575.193	1.38437	0.161269	8.58422	9.15×10^-18	4.62×10^-15
TRINITY_DN18143_c0_g1	OVC	OV	898.204	237.555	677.988	1.91942	0.223964	8.57021	1.03×10^-17	5.19×10^-15
TRINITY_DN9880_c3_g1	OVC	OV	0	997.234	332.411	-12.1423	1.4177	-8.56479	1.08×10^-17	5.40×10^-15
TRINITY_DN5279_c0_g4	OVC	OV	10.386	167.93	62.9007	-3.9938	0.467944	-8.53478	1.40×10^-17	6.95×10^-15
TRINITY_DN3893_c0_g2	OVC	OV	438.416	76.7456	317.859	2.51382	0.294858	8.52551	1.52×10^-17	7.48×10^-15
TRINITY_DN9566_c0_g2	OVC	OV	132.581	29.1478	98.1035	2.18481	0.256613	8.51405	1.68×10^-17	8.20×10^-15
TRINITY_DN6386_c4_g1	OVC	OV	131.34	6.70712	89.7955	4.29452	0.505618	8.49361	2.00×10^-17	9.72×10^-15
TRINITY_DN156_c1_g2	OVC	OV	1032.53	189.78	751.61	2.44378	0.287792	8.49148	2.04×10^-17	9.83×10^-15
TRINITY_DN8189_c0_g1	OVC	OV	1042.76	391.328	825.613	1.41293	0.166527	8.48468	2.16×10^-17	1.04×10^-14
TRINITY_DN3188_c0_g1	OVC	OV	1617.77	431.893	1222.48	1.90517	0.224563	8.48389	2.18×10^-17	1.04×10^-14
TRINITY_DN8036_c0_g2	OVC	OV	1105.79	480.258	897.281	1.20304	0.14201	8.47153	2.42×10^-17	1.14×10^-14
TRINITY_DN1814_c1_g2	OVC	OV	394.728	1345.42	711.626	-1.76975	0.209535	-8.4461	3.01×10^-17	1.40×10^-14
TRINITY_DN9163_c3_g1	OVC	OV	69.2938	319.086	152.558	-2.20172	0.26138	-8.42346	3.66×10^-17	1.69×10^-14
TRINITY_DN3390_c6_g1	OVC	OV	1.81942	209.872	71.1703	-6.87977	0.819353	-8.39659	4.60×10^-17	2.12×10^-14
TRINITY_DN10869_c0_g1	OVC	OV	1720.98	54.0763	1165.35	4.992	0.595001	8.3899	4.87×10^-17	2.23×10^-14
TRINITY_DN2805_c3_g1	OVC	OV	1288.48	435.355	1004.1	1.56589	0.186849	8.38049	5.27×10^-17	2.40×10^-14
TRINITY_DN53_c0_g1	OVC	OV	307.062	690.932	435.018	-1.16811	0.139904	-8.3494	6.86×10^-17	3.10×10^-14
TRINITY_DN27313_c0_g1	OVC	OV	14.7147	220.18	83.203	-3.9114	0.468504	-8.3487	6.90×10^-17	3.10×10^-14
TRINITY_DN9157_c0_g2	OVC	OV	3921.61	1904.05	3249.09	1.04265	0.125167	8.33009	8.08×10^-17	3.60×10^-14
TRINITY_DN2188_c9_g1	OVC	OV	0	723.834	241.278	-11.68	1.40356	-8.32169	8.67×10^-17	3.84×10^-14
TRINITY_DN2027_c0_g1	OVC	OV	3284.34	1265.55	2611.41	1.37566	0.165465	8.31385	9.26×10^-17	4.08×10^-14
TRINITY_DN91788_c5_g1	OVC	OV	634.187	0	422.792	12.3295	1.4849	8.30329	1.01×10^-16	4.41×10^-14
TRINITY_DN1372_c7_g2	OVC	OV	6836.7	1964.23	5212.54	1.79931	0.216743	8.30159	1.03×10^-16	4.44×10^-14
TRINITY_DN19480_c1_g3	OVC	OV	7.57334	125.985	47.044	-4.07942	0.491795	-8.29495	1.09×10^-16	4.67×10^-14
TRINITY_DN1034_c1_g1	OVC	OV	1056.61	505.504	872.907	1.06322	0.12829	8.28765	1.16×10^-16	4.94×10^-14
TRINITY_DN7220_c0_g1	OVC	OV	2733.48	1246.13	2237.69	1.13312	0.136786	8.28388	1.19×10^-16	5.07×10^-14
TRINITY_DN999_c0_g1	OVC	OV	238.826	610.071	362.574	-1.35679	0.163823	-8.28209	1.21×10^-16	5.11×10^-14
TRINITY_DN1597_c1_g1	OVC	OV	1872.67	860.401	1535.25	1.12147	0.135774	8.25981	1.46×10^-16	6.13×10^-14
TRINITY_DN10187_c0_g1	OVC	OV	1108.57	46.5599	754.567	4.57311	0.553814	8.25748	1.49×10^-16	6.21×10^-14
TRINITY_DN7063_c0_g1	OVC	OV	2138.29	829.862	1702.15	1.3652	0.165462	8.25081	1.57×10^-16	6.52×10^-14
TRINITY_DN436_c2_g1	OVC	OV	0	590.439	196.813	-11.3862	1.38009	-8.2503	1.58×10^-16	6.52×10^-14
TRINITY_DN8247_c0_g1	OVC	OV	650.401	301.837	534.213	1.10655	0.134342	8.23679	1.77×10^-16	7.26×10^-14
TRINITY_DN22015_c0_g1	OVC	OV	164.24	11.0217	113.167	3.89728	0.473535	8.2302	1.87×10^-16	7.62×10^-14
TRINITY_DN3004_c1_g2	OVC	OV	44.6129	235.648	108.291	-2.39696	0.291345	-8.2272	1.92×10^-16	7.77×10^-14
TRINITY_DN43796_c0_g1	OVC	OV	411.421	150.451	324.431	1.44946	0.176197	8.22635	1.93×10^-16	7.79×10^-14
TRINITY_DN3258_c0_g1	OVC	OV	10.7388	190.753	70.7437	-4.17742	0.509163	-8.20449	2.32×10^-16	9.27×10^-14
TRINITY_DN55_c3_g3	OVC	OV	0	504.958	168.319	-11.1605	1.36037	-8.20405	2.32×10^-16	9.27×10^-14
TRINITY_DN74358_c1_g2	OVC	OV	0	505.009	168.336	-11.1607	1.36279	-8.18955	2.62×10^-16	1.04×10^-13
TRINITY_DN3877_c0_g1	OVC	OV	3543.81	1744.02	2943.88	1.02286	0.124939	8.18689	2.68×10^-16	1.05×10^-13
TRINITY_DN7747_c1_g1	OVC	OV	82.5955	395.09	186.76	-2.26485	0.276653	-8.18661	2.69×10^-16	1.05×10^-13
TRINITY_DN7469_c1_g1	OVC	OV	5002.61	1036.67	3680.63	2.27085	0.27797	8.16941	3.10×10^-16	1.21×10^-13
TRINITY_DN4793_c0_g1	OVC	OV	1801.61	197.091	1266.77	3.19215	0.390928	8.16558	3.20×10^-16	1.24×10^-13
TRINITY_DN2049_c1_g1	OVC	OV	220.905	20.7547	154.188	3.41312	0.418235	8.16078	3.33×10^-16	1.28×10^-13
TRINITY_DN8627_c0_g2	OVC	OV	1730.04	684.058	1381.38	1.33918	0.16438	8.14686	3.74×10^-16	1.43×10^-13
TRINITY_DN3524_c0_g3	OVC	OV	3984.92	3.32058	2657.72	10.2265	1.25543	8.14581	3.77×10^-16	1.44×10^-13
TRINITY_DN109525_c0_g1	OVC	OV	0	489.909	163.303	-11.1169	1.36623	-8.13692	4.05×10^-16	1.54×10^-13
TRINITY_DN267_c3_g1	OVC	OV	95574.2	17642	69596.8	2.43762	0.300224	8.11934	4.69×10^-16	1.77×10^-13
TRINITY_DN3302_c0_g1	OVC	OV	1868.89	869.607	1535.79	1.10411	0.136206	8.10616	5.22×10^-16	1.96×10^-13
TRINITY_DN2482_c0_g1	OVC	OV	10.4605	115.656	45.5255	-3.47507	0.429219	-8.09627	5.67×10^-16	2.12×10^-13
TRINITY_DN6182_c0_g1	OVC	OV	14746.8	0	9831.23	29.328	3.62605	8.08815	6.06×10^-16	2.25×10^-13
TRINITY_DN3054_c1_g3	OVC	OV	364.17	17.3975	248.579	4.38616	0.543044	8.07697	6.64×10^-16	2.46×10^-13
TRINITY_DN4989_c0_g2	OVC	OV	1383.56	491.551	1086.22	1.49334	0.185	8.0721	6.91×10^-16	2.54×10^-13
TRINITY_DN45500_c0_g1	OVC	OV	0	516.088	172.029	-11.192	1.39129	-8.04433	8.67×10^-16	3.16×10^-13
TRINITY_DN1103_c1_g1	OVC	OV	11282	888.309	7817.47	3.66686	0.457032	8.0232	1.03×10^-15	3.74×10^-13
TRINITY_DN13167_c3_g1	OVC	OV	332.571	30.4657	231.869	3.4485	0.430304	8.01411	1.11×10^-15	4.00×10^-13
TRINITY_DN4219_c4_g1	OVC	OV	905.036	262.11	690.727	1.78687	0.22375	7.98603	1.39×10^-15	5.00×10^-13
TRINITY_DN69114_c0_g1	OVC	OV	45339.6	8428.85	33036	2.42739	0.304173	7.98029	1.46×10^-15	5.21×10^-13
TRINITY_DN60_c2_g2	OVC	OV	1673.43	235.147	1194	2.83097	0.35525	7.96894	1.60×10^-15	5.69×10^-13
TRINITY_DN7601_c0_g1	OVC	OV	0	796.736	265.579	-11.8185	1.48532	-7.95684	1.76×10^-15	6.24×10^-13
TRINITY_DN9255_c0_g1	OVC	OV	9828.94	4327.56	7995.15	1.18361	0.149039	7.94165	2.00×10^-15	6.99×10^-13
TRINITY_DN295_c1_g3	OVC	OV	0	534.765	178.255	-11.2433	1.41793	-7.92937	2.20×10^-15	7.68×10^-13
TRINITY_DN6810_c0_g2	OVC	OV	0	516.58	172.193	-11.1934	1.41216	-7.92643	2.26×10^-15	7.82×10^-13
TRINITY_DN8281_c1_g1	OVC	OV	10.6674	111.519	44.2845	-3.38603	0.428018	-7.91096	2.55×10^-15	8.82×10^-13
TRINITY_DN7093_c2_g1	OVC	OV	603.174	132.045	446.131	2.19259	0.277181	7.91033	2.57×10^-15	8.82×10^-13
TRINITY_DN24712_c0_g1	OVC	OV	59.7278	210.071	109.842	-1.81102	0.229136	-7.90367	2.71×10^-15	9.26×10^-13
TRINITY_DN5177_c0_g1	OVC	OV	9650.9	1702.88	7001.56	2.50269	0.317495	7.88263	3.21×10^-15	1.09×10^-12
TRINITY_DN4947_c0_g1	OVC	OV	583.007	159.125	441.713	1.87251	0.237698	7.87769	3.33×10^-15	1.13×10^-12
TRINITY_DN1788_c1_g4	OVC	OV	100.23	10.7197	70.3929	3.23096	0.410156	7.87739	3.34×10^-15	1.13×10^-12
TRINITY_DN4021_c0_g1	OVC	OV	171.566	19.1054	120.746	3.17016	0.402804	7.87022	3.54×10^-15	1.19×10^-12
TRINITY_DN312_c1_g1	OVC	OV	2663.32	932.013	2086.22	1.51475	0.192498	7.86891	3.58×10^-15	1.19×10^-12
TRINITY_DN10400_c0_g1	OVC	OV	37.0555	341.971	138.694	-3.21166	0.408957	-7.8533	4.05×10^-15	1.35×10^-12
TRINITY_DN1625_c1_g2	OVC	OV	183.562	499.775	288.967	-1.44107	0.183531	-7.85194	4.10×10^-15	1.36×10^-12
TRINITY_DN1167_c2_g1	OVC	OV	564.44	224.126	451.002	1.33357	0.16988	7.85007	4.16×10^-15	1.37×10^-12
TRINITY_DN0_c392_g1	OVC	OV	0	423.235	141.078	-10.9058	1.39118	-7.83929	4.53×10^-15	1.48×10^-12
TRINITY_DN6190_c8_g1	OVC	OV	0	423.235	141.078	-10.9058	1.39118	-7.83929	4.53×10^-15	1.48×10^-12
TRINITY_DN1990_c0_g1	OVC	OV	171.359	517.054	286.59	-1.59091	0.203018	-7.8363	4.64×10^-15	1.51×10^-12
TRINITY_DN5763_c0_g2	OVC	OV	296.878	84.4174	226.058	1.81488	0.231615	7.83576	4.66×10^-15	1.51×10^-12
TRINITY_DN2051_c0_g1	OVC	OV	542.125	26.4605	370.237	4.35589	0.556049	7.83364	4.74×10^-15	1.53×10^-12
TRINITY_DN338_c3_g1	OVC	OV	913.539	387.204	738.094	1.2377	0.158156	7.82585	5.04×10^-15	1.62×10^-12
TRINITY_DN11146_c0_g1	OVC	OV	17.6096	395.222	143.48	-4.47404	0.57174	-7.82531	5.06×10^-15	1.62×10^-12
TRINITY_DN10802_c4_g1	OVC	OV	395.883	68.2646	286.677	2.53627	0.324245	7.82207	5.20×10^-15	1.65×10^-12
TRINITY_DN13873_c0_g1	OVC	OV	643.732	76.6357	454.7	3.07094	0.392992	7.81425	5.53×10^-15	1.75×10^-12
TRINITY_DN1602_c0_g1	OVC	OV	1912.84	262.396	1362.69	2.86596	0.367023	7.80866	5.78×10^-15	1.82×10^-12
TRINITY_DN2122_c0_g1	OVC	OV	1344.02	664.811	1117.62	1.01525	0.130265	7.79369	6.51×10^-15	2.04×10^-12
TRINITY_DN89014_c2_g1	OVC	OV	114.197	347.174	191.856	-1.60023	0.205653	-7.78123	7.18×10^-15	2.24×10^-12
TRINITY_DN538_c1_g1	OVC	OV	923.44	178.434	675.105	2.37125	0.304919	7.77665	7.45×10^-15	2.31×10^-12
TRINITY_DN3190_c0_g3	OVC	OV	606.664	1332.4	848.576	-1.13717	0.146358	-7.76981	7.86×10^-15	2.43×10^-12
TRINITY_DN467_c0_g1	OVC	OV	380.135	90.4399	283.57	2.06979	0.266612	7.76331	8.27×10^-15	2.55×10^-12
TRINITY_DN9456_c1_g1	OVC	OV	11.9407	147.124	57.0019	-3.6107	0.465213	-7.76139	8.40×10^-15	2.58×10^-12
TRINITY_DN1915_c0_g1	OVC	OV	614.275	240.905	489.819	1.34874	0.173997	7.75148	9.08×10^-15	2.77×10^-12
TRINITY_DN33067_c0_g1	OVC	OV	462.907	7.67911	311.165	5.91217	0.763194	7.74662	9.44×10^-15	2.87×10^-12
TRINITY_DN15179_c0_g1	OVC	OV	107.093	1.33263	71.8396	6.3251	0.816719	7.74452	9.59×10^-15	2.91×10^-12
TRINITY_DN23640_c0_g1	OVC	OV	0	419.666	139.889	-10.8936	1.40756	-7.73934	9.99×10^-15	3.01×10^-12
TRINITY_DN30797_c0_g1	OVC	OV	0	637.084	212.361	-11.4958	1.48801	-7.72563	1.11×10^-14	3.33×10^-12
TRINITY_DN5161_c1_g3	OVC	OV	0	637.084	212.361	-11.4958	1.48801	-7.72563	1.11×10^-14	3.33×10^-12
TRINITY_DN3950_c1_g1	OVC	OV	612.22	281.627	502.022	1.11925	0.145083	7.71456	1.21×10^-14	3.60×10^-12
TRINITY_DN14290_c0_g2	OVC	OV	432.143	988.153	617.48	-1.19348	0.154733	-7.71318	1.23×10^-14	3.63×10^-12
TRINITY_DN11_c2_g1	OVC	OV	707.665	226.314	547.214	1.64397	0.213397	7.70384	1.32×10^-14	3.87×10^-12
TRINITY_DN6569_c0_g2	OVC	OV	862.739	303.876	676.451	1.50539	0.195408	7.70384	1.32×10^-14	3.87×10^-12
TRINITY_DN7304_c0_g1	OVC	OV	60.0999	310.266	143.489	-2.37698	0.308768	-7.69827	1.38×10^-14	4.03×10^-12
TRINITY_DN17031_c0_g1	OVC	OV	51.11	562.143	221.454	-3.45788	0.449976	-7.68458	1.54×10^-14	4.46×10^-12
TRINITY_DN2522_c0_g2	OVC	OV	186.451	13.7749	128.892	3.76172	0.489962	7.67756	1.62×10^-14	4.69×10^-12
TRINITY_DN422_c0_g1	OVC	OV	921.167	346.894	729.743	1.40898	0.183599	7.67423	1.66×10^-14	4.80×10^-12
TRINITY_DN472_c0_g3	OVC	OV	1798.32	822.752	1473.13	1.12849	0.147373	7.65737	1.90×10^-14	5.43×10^-12
TRINITY_DN2610_c12_g1	OVC	OV	0	385.348	128.449	-10.7705	1.40771	-7.6511	1.99×10^-14	5.68×10^-12
TRINITY_DN4623_c6_g1	OVC	OV	0	482.779	160.926	-11.0957	1.45294	-7.63674	2.23×10^-14	6.30×10^-12
TRINITY_DN3091_c15_g1	OVC	OV	0	383.691	127.897	-10.7643	1.40975	-7.63562	2.25×10^-14	6.33×10^-12
TRINITY_DN18349_c0_g1	OVC	OV	87.6464	8.34909	61.214	3.38975	0.444482	7.62629	2.42×10^-14	6.78×10^-12
TRINITY_DN7103_c0_g1	OVC	OV	4093.96	110.988	2766.3	5.20517	0.683518	7.61526	2.63×10^-14	7.35×10^-12
TRINITY_DN13575_c2_g1	OVC	OV	0	746.876	248.959	-11.7252	1.54005	-7.61354	2.67×10^-14	7.42×10^-12
TRINITY_DN26855_c1_g1	OVC	OV	0.931889	209.654	70.5058	-7.8749	1.03498	-7.60873	2.77×10^-14	7.67×10^-12
TRINITY_DN569_c1_g2	OVC	OV	423.599	60.6808	302.626	2.80234	0.368416	7.60646	2.82×10^-14	7.78×10^-12
TRINITY_DN4613_c0_g1	OVC	OV	1700.12	786.149	1395.46	1.11338	0.146387	7.60575	2.83×10^-14	7.79×10^-12
TRINITY_DN63417_c0_g3	OVC	OV	0	464.763	154.921	-11.0409	1.45185	-7.60468	2.86×10^-14	7.83×10^-12
TRINITY_DN200_c1_g1	OVC	OV	3050.99	1449.65	2517.21	1.07341	0.141201	7.60202	2.92×10^-14	7.96×10^-12
TRINITY_DN378_c2_g1	OVC	OV	1267.7	167.987	901.131	2.91527	0.38367	7.59837	3.00×10^-14	8.16×10^-12
TRINITY_DN10675_c0_g1	OVC	OV	605.071	0	403.381	12.261	1.61485	7.59265	3.13×10^-14	8.46×10^-12
TRINITY_DN3214_c1_g2	OVC	OV	274.044	17.7508	188.613	3.94628	0.519749	7.59265	3.13×10^-14	8.46×10^-12
TRINITY_DN2491_c0_g1	OVC	OV	1404.47	86.7513	965.227	4.01735	0.529171	7.59178	3.16×10^-14	8.49×10^-12
TRINITY_DN61444_c0_g1	OVC	OV	0	374.974	124.991	-10.7312	1.41415	-7.58844	3.24×10^-14	8.67×10^-12
TRINITY_DN39751_c4_g1	OVC	OV	356.805	62.9707	258.86	2.50247	0.329871	7.58621	3.29×10^-14	8.79×10^-12
TRINITY_DN2092_c1_g2	OVC	OV	43.2859	219.222	101.931	-2.34852	0.309666	-7.58406	3.35×10^-14	8.91×10^-12
TRINITY_DN2360_c1_g1	OVC	OV	1294.13	239.587	942.614	2.43334	0.322026	7.55633	4.15×10^-14	1.09×10^-11
TRINITY_DN4986_c0_g1	OVC	OV	2723.63	1068.74	2172	1.35009	0.178706	7.55479	4.20×10^-14	1.10×10^-11
TRINITY_DN1395_c0_g1	OVC	OV	4796.31	486.052	3359.56	3.30259	0.43725	7.55311	4.25×10^-14	1.11×10^-11
TRINITY_DN8042_c0_g1	OVC	OV	148.077	14.7835	103.646	3.32729	0.440708	7.54987	4.36×10^-14	1.14×10^-11
TRINITY_DN4015_c5_g1	OVC	OV	0	738.999	246.333	-11.7099	1.55183	-7.54588	4.49×10^-14	1.17×10^-11
TRINITY_DN4331_c3_g2	OVC	OV	4.49989	184.716	64.572	-5.42428	0.719446	-7.53952	4.72×10^-14	1.22×10^-11
TRINITY_DN1190_c0_g1	OVC	OV	229.482	53.0163	170.66	2.11306	0.280758	7.52629	5.22×10^-14	1.34×10^-11
TRINITY_DN378_c2_g2	OVC	OV	585.244	182.337	450.941	1.68081	0.223355	7.52529	5.26×10^-14	1.35×10^-11
TRINITY_DN1198_c0_g1	OVC	OV	1020.95	359.167	800.355	1.50777	0.200404	7.52366	5.33×10^-14	1.36×10^-11
TRINITY_DN130948_c1_g2	OVC	OV	0	390.986	130.329	-10.7915	1.4346	-7.52227	5.38×10^-14	1.37×10^-11
TRINITY_DN53221_c0_g3	OVC	OV	503.137	59.2455	355.173	3.08702	0.410541	7.5194	5.50×10^-14	1.39×10^-11
TRINITY_DN1509_c1_g1	OVC	OV	8.10116	225.138	80.4468	-4.80223	0.638726	-7.51844	5.54×10^-14	1.39×10^-11
TRINITY_DN3828_c0_g1	OVC	OV	6094.93	607.441	4265.77	3.32686	0.44329	7.50492	6.15×10^-14	1.54×10^-11
TRINITY_DN114208_c0_g1	OVC	OV	339.5	109.818	262.939	1.62713	0.216857	7.50325	6.23×10^-14	1.55×10^-11
TRINITY_DN3184_c0_g1	OVC	OV	4337.64	463.888	3046.39	3.22502	0.430133	7.49774	6.49×10^-14	1.61×10^-11
TRINITY_DN12318_c1_g1	OVC	OV	129.504	12.067	90.3586	3.42617	0.457679	7.48597	7.10×10^-14	1.75×10^-11
TRINITY_DN5354_c0_g1	OVC	OV	1992.72	742.552	1576	1.42442	0.190591	7.47369	7.80×10^-14	1.92×10^-11
TRINITY_DN603_c2_g1	OVC	OV	3664.27	1300.39	2876.31	1.4945	0.200061	7.47021	8.01×10^-14	1.96×10^-11
TRINITY_DN1724_c0_g1	OVC	OV	877.65	364.219	706.506	1.26799	0.169954	7.46075	8.60×10^-14	2.09×10^-11
TRINITY_DN4033_c0_g1	OVC	OV	36.5147	157.18	76.7364	-2.10185	0.281724	-7.46068	8.61×10^-14	2.09×10^-11
TRINITY_DN15260_c0_g1	OVC	OV	1467.03	336.249	1090.11	2.12534	0.284932	7.4591	8.71×10^-14	2.11×10^-11
TRINITY_DN31088_c0_g1	OVC	OV	12.8981	970.073	331.956	-6.26355	0.840177	-7.45504	8.98×10^-14	2.17×10^-11
TRINITY_DN5307_c6_g1	OVC	OV	0	372.422	124.141	-10.7213	1.43872	-7.452	9.19×10^-14	2.22×10^-11
TRINITY_DN90_c0_g1	OVC	OV	1814.11	846.16	1491.46	1.10101	0.147801	7.44926	9.39×10^-14	2.25×10^-11
TRINITY_DN455_c3_g1	OVC	OV	1160.07	90.1305	803.424	3.68642	0.495147	7.44511	9.69×10^-14	2.32×10^-11
TRINITY_DN13520_c0_g1	OVC	OV	669.106	5.68383	447.966	6.87809	0.925872	7.42877	1.10×10^-13	2.61×10^-11
TRINITY_DN2212_c1_g1	OVC	OV	2832.68	740.153	2135.17	1.93595	0.26088	7.42083	1.16×10^-13	2.77×10^-11
TRINITY_DN2141_c0_g1	OVC	OV	1707.79	626.306	1347.29	1.4478	0.195456	7.40729	1.29×10^-13	3.05×10^-11
TRINITY_DN11076_c0_g1	OVC	OV	18.2824	235.443	90.6691	-3.66856	0.495265	-7.40726	1.29×10^-13	3.05×10^-11
TRINITY_DN3102_c4_g1	OVC	OV	0	373.026	124.342	-10.7236	1.44845	-7.40355	1.33×10^-13	3.11×10^-11
TRINITY_DN3578_c1_g1	OVC	OV	2078.85	0	1385.9	26.6029	3.59331	7.40345	1.33×10^-13	3.11×10^-11
TRINITY_DN6406_c0_g2	OVC	OV	586.15	101.204	424.501	2.53401	0.342476	7.39909	1.37×10^-13	3.21×10^-11
TRINITY_DN24926_c0_g1	OVC	OV	0	341.093	113.698	-10.5945	1.43254	-7.39562	1.41×10^-13	3.28×10^-11
TRINITY_DN6630_c4_g1	OVC	OV	0	338.59	112.863	-10.5839	1.43161	-7.39301	1.44×10^-13	3.34×10^-11
TRINITY_DN36587_c0_g1	OVC	OV	174.772	1.01596	116.853	7.43748	1.00675	7.38762	1.49×10^-13	3.46×10^-11
TRINITY_DN6044_c0_g3	OVC	OV	1198.11	211.627	869.281	2.50053	0.338843	7.37963	1.59×10^-13	3.66×10^-11
TRINITY_DN7440_c0_g1	OVC	OV	2208.17	248.238	1554.86	3.15273	0.428508	7.35746	1.87×10^-13	4.31×10^-11
TRINITY_DN12674_c0_g1	OVC	OV	10.7385	94.0478	38.5083	-3.1385	0.426795	-7.35364	1.93×10^-13	4.42×10^-11
TRINITY_DN10241_c0_g2	OVC	OV	0	343.745	114.582	-10.6057	1.44231	-7.35327	1.93×10^-13	4.42×10^-11
TRINITY_DN5492_c0_g2	OVC	OV	39.7792	160.522	80.0269	-2.00916	0.273576	-7.34406	2.07×10^-13	4.72×10^-11
TRINITY_DN131667_c0_g1	OVC	OV	0	404.906	134.969	-10.842	1.47671	-7.34196	2.10×10^-13	4.78×10^-11
TRINITY_DN9658_c3_g1	OVC	OV	23.2913	203.974	83.5189	-3.14949	0.429025	-7.34104	2.12×10^-13	4.80×10^-11
TRINITY_DN188_c1_g1	OVC	OV	1452.48	620.71	1175.23	1.22612	0.167235	7.33174	2.27×10^-13	5.13×10^-11
TRINITY_DN3615_c3_g1	OVC	OV	0	452.526	150.842	-11.0024	1.50153	-7.32744	2.35×10^-13	5.28×10^-11
TRINITY_DN1302_c0_g4	OVC	OV	617.023	195.781	476.609	1.65497	0.226097	7.31973	2.48×10^-13	5.57×10^-11
TRINITY_DN8096_c1_g2	OVC	OV	63.9588	530.972	219.63	-3.04486	0.416017	-7.31906	2.50×10^-13	5.59×10^-11
TRINITY_DN2821_c0_g1	OVC	OV	3132.87	1012.03	2425.92	1.63018	0.222746	7.31854	2.51×10^-13	5.59×10^-11
TRINITY_DN4884_c0_g1	OVC	OV	341.718	39.8528	241.096	3.09897	0.423603	7.31572	2.56×10^-13	5.69×10^-11
TRINITY_DN783_c2_g1	OVC	OV	17.7306	654.055	229.839	-5.21195	0.712568	-7.31432	2.59×10^-13	5.73×10^-11
TRINITY_DN4991_c0_g1	OVC	OV	6075.62	2430.56	4860.6	1.32177	0.180779	7.31155	2.64×10^-13	5.83×10^-11
TRINITY_DN5415_c0_g1	OVC	OV	797.838	194.559	596.745	2.03479	0.278681	7.3015	2.85×10^-13	6.27×10^-11
TRINITY_DN4694_c1_g1	OVC	OV	5.5392	122.835	44.6378	-4.45556	0.610987	-7.2924	3.04×10^-13	6.69×10^-11
TRINITY_DN3636_c0_g1	OVC	OV	327.419	68.2792	241.039	2.26389	0.310965	7.28021	3.33×10^-13	7.30×10^-11
TRINITY_DN10559_c0_g1	OVC	OV	322.069	0	214.712	11.3507	1.55984	7.27679	3.42×10^-13	7.46×10^-11
TRINITY_DN8923_c0_g1	OVC	OV	159.826	8.73905	109.464	4.19513	0.576551	7.27625	3.43×10^-13	7.47×10^-11
TRINITY_DN15982_c0_g1	OVC	OV	210.697	723.622	381.672	-1.78329	0.245164	-7.27389	3.49×10^-13	7.58×10^-11
TRINITY_DN1128_c5_g1	OVC	OV	346.185	0	230.79	11.4566	1.57611	7.2689	3.62×10^-13	7.84×10^-11
TRINITY_DN554_c0_g2	OVC	OV	140.557	3.34257	94.8186	5.39286	0.743366	7.25466	4.03×10^-13	8.68×10^-11
TRINITY_DN2768_c0_g1	OVC	OV	1906.1	891.886	1568.03	1.09578	0.151115	7.2513	4.13×10^-13	8.87×10^-11
TRINITY_DN29423_c1_g4	OVC	OV	0	470.792	156.931	-11.0594	1.52543	-7.25006	4.17×10^-13	8.92×10^-11
TRINITY_DN1906_c0_g1	OVC	OV	3521.46	966.935	2669.95	1.86489	0.257232	7.24982	4.17×10^-13	8.92×10^-11
TRINITY_DN36510_c0_g1	OVC	OV	42.2869	155.745	80.1061	-1.88611	0.260305	-7.24576	4.30×10^-13	9.16×10^-11
TRINITY_DN6136_c0_g1	OVC	OV	381.703	138.936	300.781	1.4581	0.20125	7.24523	4.32×10^-13	9.17×10^-11
TRINITY_DN1485_c1_g2	OVC	OV	1579.41	732.287	1297.03	1.10962	0.153161	7.24479	4.33×10^-13	9.17×10^-11
TRINITY_DN44300_c7_g1	OVC	OV	0	319.344	106.448	-10.4995	1.45033	-7.23936	4.51×10^-13	9.52×10^-11
TRINITY_DN5161_c1_g2	OVC	OV	294.325	636.268	408.306	-1.10999	0.153545	-7.22906	4.86×10^-13	1.02×10^-10
TRINITY_DN7334_c1_g1	OVC	OV	20.9325	389.614	143.826	-4.19846	0.580977	-7.22655	4.95×10^-13	1.04×10^-10
TRINITY_DN35045_c1_g1	OVC	OV	0	482.384	160.795	-11.0945	1.5361	-7.22253	5.10×10^-13	1.07×10^-10
TRINITY_DN53724_c2_g1	OVC	OV	12.8206	119.787	48.4761	-3.21171	0.444718	-7.22191	5.13×10^-13	1.07×10^-10
TRINITY_DN45098_c6_g1	OVC	OV	0	472.845	157.615	-11.0657	1.53341	-7.21639	5.34×10^-13	1.11×10^-10
TRINITY_DN9397_c0_g1	OVC	OV	634.603	80.2069	449.804	2.98383	0.414237	7.20317	5.88×10^-13	1.22×10^-10
TRINITY_DN297_c12_g1	OVC	OV	517.532	0	345.021	12.0366	1.67435	7.18879	6.54×10^-13	1.35×10^-10
TRINITY_DN2801_c1_g1	OVC	OV	462.471	85.706	336.883	2.43293	0.338647	7.18427	6.76×10^-13	1.39×10^-10
TRINITY_DN3667_c1_g2	OVC	OV	657.612	30.5024	448.575	4.43087	0.616874	7.18278	6.83×10^-13	1.40×10^-10
TRINITY_DN7621_c3_g1	OVC	OV	8.99083	213.097	77.0263	-4.5361	0.632335	-7.17356	7.31×10^-13	1.49×10^-10
TRINITY_DN11880_c0_g1	OVC	OV	3187.89	16.7422	2130.84	7.57283	1.05568	7.17341	7.32×10^-13	1.49×10^-10
TRINITY_DN38644_c3_g1	OVC	OV	0	308.941	102.98	-10.4517	1.45798	-7.16863	7.57×10^-13	1.53×10^-10
TRINITY_DN1150_c7_g2	OVC	OV	0	363.362	121.121	-10.6858	1.49063	-7.16863	7.58×10^-13	1.53×10^-10
TRINITY_DN6249_c1_g1	OVC	OV	0	370.465	123.488	-10.7137	1.49457	-7.16841	7.59×10^-13	1.53×10^-10
TRINITY_DN72677_c5_g1	OVC	OV	0	330.221	110.074	-10.5478	1.47213	-7.16499	7.78×10^-13	1.56×10^-10
TRINITY_DN7311_c2_g1	OVC	OV	1.23806	146.209	49.5618	-6.9353	0.968001	-7.16456	7.80×10^-13	1.57×10^-10
TRINITY_DN7579_c28_g1	OVC	OV	0	636.706	212.235	-11.495	1.60643	-7.15561	8.33×10^-13	1.67×10^-10
TRINITY_DN590_c0_g2	OVC	OV	584.755	63.4633	410.991	3.20496	0.447973	7.15437	8.41×10^-13	1.68×10^-10
TRINITY_DN3779_c0_g2	OVC	OV	373.542	156.502	301.195	1.25668	0.175807	7.14808	8.80×10^-13	1.75×10^-10
TRINITY_DN2784_c0_g1	OVC	OV	178.991	24.5312	127.505	2.86822	0.401857	7.13743	9.51×10^-13	1.89×10^-10
TRINITY_DN24985_c1_g1	OVC	OV	11170.4	0	7446.92	30	4.20604	7.1326	9.85×10^-13	1.95×10^-10
TRINITY_DN1570_c1_g1	OVC	OV	18094.8	5225.38	13805	1.79194	0.251568	7.12308	1.06×10^-12	2.08×10^-10
TRINITY_DN87032_c0_g1	OVC	OV	215.709	19.4441	150.288	3.47148	0.48884	7.10147	1.23×10^-12	2.41×10^-10
TRINITY_DN2020_c1_g1	OVC	OV	2685.55	843.733	2071.61	1.66995	0.235604	7.08793	1.36×10^-12	2.66×10^-10
TRINITY_DN6387_c0_g2	OVC	OV	598.582	142.116	446.427	2.07421	0.292932	7.08084	1.43×10^-12	2.79×10^-10
TRINITY_DN885_c0_g2	OVC	OV	456.585	149.067	354.079	1.61562	0.228203	7.07974	1.44×10^-12	2.80×10^-10
TRINITY_DN5677_c0_g1	OVC	OV	227.987	0	151.991	10.8534	1.53344	7.07786	1.46×10^-12	2.83×10^-10
TRINITY_DN6583_c0_g1	OVC	OV	19.6312	163.6	67.6206	-3.07024	0.433881	-7.07621	1.48×10^-12	2.86×10^-10
TRINITY_DN43950_c0_g1	OVC	OV	337.429	1311.17	662.008	-1.9556	0.27664	-7.06911	1.56×10^-12	3.00×10^-10
TRINITY_DN3518_c3_g1	OVC	OV	1.053	164.91	55.6721	-7.15862	1.01333	-7.06442	1.61×10^-12	3.10×10^-10
TRINITY_DN2303_c0_g2	OVC	OV	114.488	8.03242	79.0031	3.8328	0.542842	7.06061	1.66×10^-12	3.17×10^-10
TRINITY_DN1140_c0_g1	OVC	OV	5138.47	461.173	3579.37	3.47809	0.49267	7.05967	1.67×10^-12	3.19×10^-10
TRINITY_DN9359_c0_g1	OVC	OV	5093	1843.27	4009.76	1.46622	0.207899	7.05256	1.76×10^-12	3.35×10^-10
TRINITY_DN9742_c0_g2	OVC	OV	847.406	310.908	668.573	1.44543	0.205038	7.04956	1.79×10^-12	3.41×10^-10
TRINITY_DN4257_c0_g2	OVC	OV	1199.67	331.279	910.208	1.85683	0.263556	7.0453	1.85×10^-12	3.51×10^-10
TRINITY_DN8213_c9_g1	OVC	OV	0	688.899	229.633	-11.6087	1.64834	-7.04262	1.89×10^-12	3.56×10^-10
TRINITY_DN4511_c0_g2	OVC	OV	1233.24	492.331	986.267	1.32507	0.188233	7.03949	1.93×10^-12	3.64×10^-10
TRINITY_DN27752_c0_g1	OVC	OV	0	317.13	105.71	-10.4894	1.49035	-7.03822	1.95×10^-12	3.65×10^-10
TRINITY_DN46788_c0_g1	OVC	OV	0	297.647	99.2156	-10.398	1.47742	-7.03793	1.95×10^-12	3.65×10^-10
TRINITY_DN93485_c0_g3	OVC	OV	0	292.199	97.3996	-10.3713	1.47367	-7.03776	1.95×10^-12	3.65×10^-10
TRINITY_DN33707_c0_g2	OVC	OV	2.36551	186.858	63.8631	-6.424	0.914148	-7.02731	2.11×10^-12	3.92×10^-10
TRINITY_DN8628_c0_g1	OVC	OV	113.117	2.00994	76.0816	5.8178	0.828117	7.02534	2.14×10^-12	3.96×10^-10
TRINITY_DN2340_c2_g1	OVC	OV	1.82821	108.61	37.4221	-5.92203	0.843404	-7.02158	2.19×10^-12	4.06×10^-10
TRINITY_DN27454_c0_g2	OVC	OV	1448.75	324.587	1074.03	2.15847	0.307786	7.01289	2.33×10^-12	4.30×10^-10
TRINITY_DN1963_c7_g1	OVC	OV	1213.24	514.623	980.368	1.23781	0.176742	7.00349	2.50×10^-12	4.57×10^-10
TRINITY_DN217_c5_g2	OVC	OV	0	297.021	99.0069	-10.3949	1.48452	-7.00221	2.52×10^-12	4.60×10^-10
TRINITY_DN24791_c0_g1	OVC	OV	3.50434	98.745	35.2512	-4.88766	0.698232	-7.00004	2.56×10^-12	4.66×10^-10
TRINITY_DN1305_c0_g2	OVC	OV	1669	451.126	1263.04	1.88755	0.269668	6.99952	2.57×10^-12	4.67×10^-10
TRINITY_DN16122_c0_g3	OVC	OV	0	340.036	113.345	-10.5901	1.51349	-6.99712	2.61×10^-12	4.74×10^-10
TRINITY_DN82471_c0_g2	OVC	OV	0	285.83	95.2768	-10.3395	1.47964	-6.98785	2.79×10^-12	5.04×10^-10
TRINITY_DN5045_c1_g1	OVC	OV	34.7444	173.753	81.0807	-2.31868	0.331823	-6.9877	2.79×10^-12	5.04×10^-10
TRINITY_DN5291_c0_g3	OVC	OV	0	411.385	137.128	-10.8648	1.55516	-6.9863	2.82×10^-12	5.07×10^-10
TRINITY_DN8502_c10_g1	OVC	OV	0	411.385	137.128	-10.8648	1.55516	-6.9863	2.82×10^-12	5.07×10^-10
TRINITY_DN2403_c0_g1	OVC	OV	6929.57	2969.85	5609.67	1.22226	0.175029	6.98318	2.89×10^-12	5.17×10^-10
TRINITY_DN17896_c2_g1	OVC	OV	18.6327	107.167	48.1443	-2.53552	0.363488	-6.97552	3.05×10^-12	5.43×10^-10
TRINITY_DN23789_c0_g1	OVC	OV	1818.09	843.085	1493.09	1.10802	0.158881	6.97387	3.08×10^-12	5.48×10^-10
TRINITY_DN4715_c0_g1	OVC	OV	855.557	266.63	659.248	1.68226	0.241392	6.96899	3.19×10^-12	5.66×10^-10
TRINITY_DN2086_c0_g4	OVC	OV	89.5935	265.872	148.353	-1.56547	0.224782	-6.96439	3.30×10^-12	5.83×10^-10
TRINITY_DN396_c0_g2	OVC	OV	16.0538	137.102	56.4033	-3.07331	0.441518	-6.96079	3.38×10^-12	5.97×10^-10
TRINITY_DN3550_c0_g1	OVC	OV	9149.93	2.00994	6100.63	12.1524	1.74601	6.96008	3.40×10^-12	5.98×10^-10
TRINITY_DN4578_c0_g1	OVC	OV	1561.08	658.053	1260.07	1.24584	0.179113	6.95559	3.51×10^-12	6.16×10^-10
TRINITY_DN5966_c1_g1	OVC	OV	1073.51	232.159	793.057	2.20863	0.317565	6.95491	3.53×10^-12	6.18×10^-10
TRINITY_DN1134_c2_g1	OVC	OV	292.452	0	194.968	11.2114	1.61388	6.94684	3.74×10^-12	6.53×10^-10
TRINITY_DN56553_c1_g1	OVC	OV	0	343.328	114.443	-10.6039	1.52726	-6.94312	3.84×10^-12	6.68×10^-10
TRINITY_DN15739_c0_g4	OVC	OV	0	279.801	93.2669	-10.3088	1.48584	-6.93801	3.98×10^-12	6.89×10^-10
TRINITY_DN20330_c0_g1	OVC	OV	0	279.801	93.2669	-10.3088	1.48584	-6.93801	3.98×10^-12	6.89×10^-10
TRINITY_DN12876_c0_g1	OVC	OV	99.8998	21.8073	73.869	2.19989	0.317084	6.93787	3.98×10^-12	6.89×10^-10
TRINITY_DN18390_c1_g2	OVC	OV	570.336	148.655	429.776	1.94074	0.27996	6.93221	4.14×10^-12	7.15×10^-10
TRINITY_DN1985_c0_g1	OVC	OV	1400.58	36.8782	946.01	5.24728	0.758928	6.91406	4.71×10^-12	8.11×10^-10
TRINITY_DN3219_c3_g2	OVC	OV	8.84251	138.008	51.8978	-3.98189	0.577029	-6.90067	5.18×10^-12	8.89×10^-10
TRINITY_DN9785_c4_g1	OVC	OV	19.7716	116.805	52.1161	-2.57081	0.372643	-6.89885	5.24×10^-12	8.98×10^-10
TRINITY_DN465_c1_g1	OVC	OV	251.334	664.675	389.114	-1.40445	0.203698	-6.89476	5.40×10^-12	9.22×10^-10
TRINITY_DN612_c0_g3	OVC	OV	224.244	76.0243	174.838	1.55802	0.226005	6.89372	5.44×10^-12	9.27×10^-10
TRINITY_DN2156_c1_g1	OVC	OV	186.086	20.114	130.762	3.20857	0.465872	6.88723	5.69×10^-12	9.68×10^-10
TRINITY_DN3409_c1_g1	OVC	OV	360.877	48.3411	256.698	2.89954	0.421349	6.88157	5.92×10^-12	1.00×10^-09
TRINITY_DN2038_c9_g1	OVC	OV	312.343	90.4399	238.376	1.78849	0.260415	6.86784	6.52×10^-12	1.10×10^-09
TRINITY_DN20920_c0_g3	OVC	OV	0	270.399	90.133	-10.2595	1.49439	-6.86533	6.63×10^-12	1.12×10^-09
TRINITY_DN11706_c0_g1	OVC	OV	713.341	260.931	562.538	1.45158	0.21175	6.85514	7.12×10^-12	1.20×10^-09
TRINITY_DN1905_c2_g2	OVC	OV	1.0337	210.218	70.7618	-7.52746	1.09816	-6.85462	7.15×10^-12	1.20×10^-09
TRINITY_DN10365_c0_g2	OVC	OV	2090.73	680.906	1620.79	1.61802	0.236312	6.84696	7.54×10^-12	1.26×10^-09
TRINITY_DN29676_c2_g1	OVC	OV	0	322.839	107.613	-10.5152	1.53652	-6.84348	7.73×10^-12	1.28×10^-09
TRINITY_DN4458_c1_g3	OVC	OV	0	322.839	107.613	-10.5152	1.53652	-6.84348	7.73×10^-12	1.28×10^-09
TRINITY_DN27693_c0_g3	OVC	OV	3.56468	96.889	34.6728	-4.77084	0.697275	-6.84213	7.80×10^-12	1.29×10^-09
TRINITY_DN54027_c0_g1	OVC	OV	0	314.409	104.803	-10.477	1.53151	-6.84094	7.87×10^-12	1.30×10^-09
TRINITY_DN2706_c0_g1	OVC	OV	307.801	1058.08	557.894	-1.78314	0.260672	-6.84054	7.89×10^-12	1.30×10^-09
TRINITY_DN4018_c1_g1	OVC	OV	60.9751	464.016	195.322	-2.91982	0.427502	-6.82995	8.49×10^-12	1.40×10^-09
TRINITY_DN14405_c0_g1	OVC	OV	1316.24	468.722	1033.73	1.48934	0.218072	6.8296	8.51×10^-12	1.40×10^-09
TRINITY_DN2871_c0_g1	OVC	OV	2987.61	1156.61	2377.28	1.36881	0.200451	6.82865	8.57×10^-12	1.41×10^-09
TRINITY_DN14055_c5_g1	OVC	OV	0	312.618	104.206	-10.4688	1.53329	-6.82763	8.63×10^-12	1.41×10^-09
TRINITY_DN16067_c0_g1	OVC	OV	6761.55	2084.9	5202.66	1.69746	0.24875	6.82395	8.86×10^-12	1.45×10^-09
TRINITY_DN427_c0_g1	OVC	OV	3893.19	363.931	2716.77	3.4193	0.501233	6.82178	8.99×10^-12	1.46×10^-09
TRINITY_DN3356_c0_g1	OVC	OV	1181.45	380.674	914.527	1.63298	0.239519	6.81772	9.25×10^-12	1.50×10^-09
TRINITY_DN3219_c1_g1	OVC	OV	828.505	292.686	649.898	1.49978	0.220113	6.81367	9.51×10^-12	1.54×10^-09
TRINITY_DN49724_c0_g1	OVC	OV	0	415.279	138.426	-10.8784	1.59763	-6.8091	9.82×10^-12	1.58×10^-09
TRINITY_DN1767_c7_g1	OVC	OV	1552.19	706.491	1270.29	1.13498	0.166771	6.80564	1.01×10^-11	1.62×10^-09
TRINITY_DN11_c1_g1	OVC	OV	3299.63	366.03	2321.76	3.17227	0.466532	6.79969	1.05×10^-11	1.68×10^-09
TRINITY_DN4961_c0_g1	OVC	OV	26.3956	138.914	63.9018	-2.3835	0.35076	-6.79523	1.08×10^-11	1.73×10^-09
TRINITY_DN1315_c3_g1	OVC	OV	0	296.232	98.744	-10.3911	1.53114	-6.78651	1.15×10^-11	1.84×10^-09
TRINITY_DN20105_c0_g1	OVC	OV	924.806	24.7966	624.803	5.22136	0.770033	6.7807	1.20×10^-11	1.91×10^-09
TRINITY_DN60023_c3_g1	OVC	OV	0.306168	159.308	53.3069	-8.77486	1.29494	-6.7763	1.23×10^-11	1.96×10^-09
TRINITY_DN1003_c2_g1	OVC	OV	3.74353	149.495	52.3273	-5.30313	0.782604	-6.77627	1.23×10^-11	1.96×10^-09
TRINITY_DN387_c8_g1	OVC	OV	1491.28	0	994.186	13.5628	2.0024	6.77328	1.26×10^-11	1.99×10^-09
TRINITY_DN6820_c1_g1	OVC	OV	0.854847	160.581	54.0969	-7.50708	1.10952	-6.76609	1.32×10^-11	2.09×10^-09
TRINITY_DN28525_c0_g1	OVC	OV	8027.09	0	5351.39	28.4539	4.20604	6.76502	1.33×10^-11	2.10×10^-09
TRINITY_DN5147_c0_g1	OVC	OV	5285.44	1544.32	4038.4	1.77503	0.262429	6.76385	1.34×10^-11	2.11×10^-09
TRINITY_DN6190_c2_g2	OVC	OV	165.349	0	110.233	10.3876	1.53611	6.76225	1.36×10^-11	2.13×10^-09
TRINITY_DN2457_c2_g2	OVC	OV	80.0863	302.419	154.197	-1.92184	0.284302	-6.75985	1.38×10^-11	2.16×10^-09
TRINITY_DN1722_c0_g1	OVC	OV	750.919	201.774	567.87	1.89619	0.280534	6.75921	1.39×10^-11	2.17×10^-09
TRINITY_DN8831_c3_g1	OVC	OV	0	274.639	91.5462	-10.2819	1.52127	-6.75876	1.39×10^-11	2.17×10^-09
TRINITY_DN2532_c0_g2	OVC	OV	372.35	52.3463	265.682	2.82903	0.418623	6.75794	1.40×10^-11	2.18×10^-09
TRINITY_DN21252_c0_g1	OVC	OV	7639.61	0	5093.07	28.4216	4.20604	6.75732	1.41×10^-11	2.18×10^-09
TRINITY_DN74352_c5_g1	OVC	OV	127.676	3.71054	86.3542	5.10674	0.756109	6.75397	1.44×10^-11	2.23×10^-09
TRINITY_DN16957_c0_g2	OVC	OV	240.197	0	160.131	10.929	1.62359	6.73139	1.68×10^-11	2.59×10^-09
TRINITY_DN74_c0_g1	OVC	OV	2766.14	756.481	2096.25	1.87067	0.278072	6.72729	1.73×10^-11	2.66×10^-09
TRINITY_DN2018_c3_g1	OVC	OV	41.3272	151.047	77.9006	-1.85907	0.276363	-6.72692	1.73×10^-11	2.66×10^-09
TRINITY_DN4284_c2_g3	OVC	OV	988.703	67.7705	681.725	3.86718	0.575127	6.72404	1.77×10^-11	2.71×10^-09
TRINITY_DN45912_c1_g1	OVC	OV	0	352.273	117.424	-10.641	1.58266	-6.72351	1.77×10^-11	2.72×10^-09
TRINITY_DN9923_c0_g3	OVC	OV	607.271	32.225	415.589	4.23552	0.630393	6.71885	1.83×10^-11	2.80×10^-09
TRINITY_DN620_c0_g1	OVC	OV	857.112	296.559	670.261	1.53218	0.22834	6.71007	1.95×10^-11	2.97×10^-09
TRINITY_DN38433_c4_g1	OVC	OV	96.5559	4.01988	65.7106	4.58508	0.683689	6.70638	2.00×10^-11	3.03×10^-09
TRINITY_DN4507_c0_g1	OVC	OV	128.734	336.558	198.009	-1.38615	0.206698	-6.70613	2.00×10^-11	3.03×10^-09
TRINITY_DN1925_c1_g1	OVC	OV	16035.8	6594.11	12888.5	1.28198	0.191195	6.70511	2.01×10^-11	3.05×10^-09
TRINITY_DN796_c0_g1	OVC	OV	278.901	116.591	224.798	1.26025	0.188085	6.7004	2.08×10^-11	3.14×10^-09
TRINITY_DN31241_c0_g1	OVC	OV	125.8	10.0863	87.2287	3.64046	0.543357	6.69994	2.09×10^-11	3.15×10^-09
TRINITY_DN998_c0_g1	OVC	OV	4121.49	1980.86	3407.95	1.05726	0.157866	6.69719	2.12×10^-11	3.20×10^-09
TRINITY_DN57657_c0_g1	OVC	OV	190.992	0	127.328	10.5992	1.58382	6.69213	2.20×10^-11	3.30×10^-09
TRINITY_DN39794_c3_g1	OVC	OV	8.01303	326.509	114.178	-5.38238	0.804413	-6.69107	2.22×10^-11	3.32×10^-09
TRINITY_DN2168_c4_g3	OVC	OV	0	250.153	83.3843	-10.1472	1.51698	-6.68905	2.25×10^-11	3.36×10^-09
TRINITY_DN1117_c7_g1	OVC	OV	956.687	350.009	754.461	1.45148	0.217061	6.68697	2.28×10^-11	3.40×10^-09
TRINITY_DN756_c0_g1	OVC	OV	390.212	28.7798	269.735	3.76128	0.563008	6.68068	2.38×10^-11	3.54×10^-09
TRINITY_DN98912_c0_g1	OVC	OV	6054.28	0	4036.19	28.095	4.20604	6.67968	2.39×10^-11	3.56×10^-09
TRINITY_DN3708_c4_g1	OVC	OV	5.63614	484.325	165.199	-6.47301	0.969332	-6.67781	2.43×10^-11	3.60×10^-09
TRINITY_DN26172_c0_g3	OVC	OV	384.841	102.801	290.828	1.90536	0.285443	6.6751	2.47×10^-11	3.66×10^-09
TRINITY_DN403_c0_g2	OVC	OV	2389.87	1019.42	1933.05	1.22956	0.184237	6.6738	2.49×10^-11	3.68×10^-09
TRINITY_DN1121_c0_g2	OVC	OV	747.956	201.422	565.778	1.89151	0.283497	6.67207	2.52×10^-11	3.72×10^-09
TRINITY_DN5879_c0_g1	OVC	OV	524.061	221.351	423.157	1.24283	0.186521	6.66323	2.68×10^-11	3.94×10^-09
TRINITY_DN961_c3_g1	OVC	OV	642.373	277.062	520.603	1.21229	0.182004	6.6608	2.72×10^-11	4.00×10^-09
TRINITY_DN1068_c10_g1	OVC	OV	126.901	0	84.6005	10.0099	1.50346	6.65792	2.78×10^-11	4.07×10^-09
TRINITY_DN3432_c2_g1	OVC	OV	849.755	116.192	605.234	2.8708	0.431222	6.65736	2.79×10^-11	4.08×10^-09
TRINITY_DN3922_c0_g1	OVC	OV	1773.65	757.411	1434.9	1.22691	0.184317	6.65652	2.80×10^-11	4.09×10^-09
TRINITY_DN16016_c0_g1	OVC	OV	24.3976	181.366	76.7206	-2.89091	0.434745	-6.64967	2.94×10^-11	4.28×10^-09
TRINITY_DN19600_c0_g1	OVC	OV	247.102	71.0031	188.402	1.79844	0.270492	6.64878	2.96×10^-11	4.29×10^-09
TRINITY_DN1716_c0_g1	OVC	OV	909.733	178.958	666.141	2.34528	0.352747	6.64863	2.96×10^-11	4.29×10^-09
TRINITY_DN33928_c6_g1	OVC	OV	0	246.957	82.319	-10.1286	1.52411	-6.64561	3.02×10^-11	4.37×10^-09
TRINITY_DN2696_c3_g1	OVC	OV	523.397	23.8759	356.89	4.45532	0.670858	6.64122	3.11×10^-11	4.49×10^-09
TRINITY_DN12076_c0_g1	OVC	OV	2613.78	442.399	1889.98	2.5625	0.385877	6.64072	3.12×10^-11	4.50×10^-09
TRINITY_DN2604_c0_g1	OVC	OV	481.561	99.1716	354.098	2.27917	0.343459	6.63592	3.22×10^-11	4.64×10^-09
TRINITY_DN39140_c0_g2	OVC	OV	0	271.377	90.4589	-10.2647	1.54714	-6.6346	3.25×10^-11	4.67×10^-09
TRINITY_DN3816_c0_g1	OVC	OV	511.885	217.353	413.708	1.23443	0.186215	6.62909	3.38×10^-11	4.84×10^-09
TRINITY_DN2236_c1_g2	OVC	OV	41950.4	3115.71	29005.5	3.75105	0.566345	6.62325	3.51×10^-11	5.02×10^-09
TRINITY_DN3077_c0_g1	OVC	OV	15517.4	6274.11	12436.3	1.30647	0.197344	6.62026	3.59×10^-11	5.11×10^-09
TRINITY_DN10394_c6_g1	OVC	OV	157.68	4.99186	106.784	4.98007	0.752425	6.6187	3.62×10^-11	5.15×10^-09
TRINITY_DN11600_c0_g1	OVC	OV	1042.28	432.689	839.083	1.26714	0.191636	6.61223	3.79×10^-11	5.37×10^-09
TRINITY_DN372_c7_g1	OVC	OV	527.483	218.437	424.467	1.27115	0.192297	6.61033	3.83×10^-11	5.43×10^-09
TRINITY_DN3936_c0_g1	OVC	OV	2205.46	574.775	1661.9	1.93982	0.293601	6.607	3.92×10^-11	5.54×10^-09
TRINITY_DN8504_c0_g1	OVC	OV	9.92442	117.784	45.8777	-3.54135	0.536061	-6.60624	3.94×10^-11	5.56×10^-09
TRINITY_DN6288_c10_g1	OVC	OV	109.028	0	72.6851	9.78931	1.48316	6.6003	4.10×10^-11	5.78×10^-09
TRINITY_DN37603_c0_g1	OVC	OV	0	277.149	92.3828	-10.295	1.5604	-6.59767	4.18×10^-11	5.87×10^-09
TRINITY_DN2405_c0_g4	OVC	OV	0	283.568	94.5228	-10.3281	1.56692	-6.59131	4.36×10^-11	6.11×10^-09
TRINITY_DN6779_c3_g1	OVC	OV	10.2532	94.1651	38.2238	-3.19094	0.484474	-6.58639	4.51×10^-11	6.30×10^-09
TRINITY_DN3031_c0_g3	OVC	OV	142.961	0	95.3075	10.1808	1.54615	6.58463	4.56×10^-11	6.36×10^-09
TRINITY_DN19443_c0_g2	OVC	OV	3.06339	107.763	37.9631	-5.16429	0.784637	-6.58175	4.65×10^-11	6.47×10^-09
TRINITY_DN9880_c0_g1	OVC	OV	863.505	402.203	709.738	1.10185	0.16753	6.57701	4.80×10^-11	6.67×10^-09
TRINITY_DN21390_c0_g1	OVC	OV	53.9013	197.232	101.678	-1.86727	0.284021	-6.5744	4.89×10^-11	6.77×10^-09
TRINITY_DN17711_c3_g1	OVC	OV	0	485.285	161.762	-11.1032	1.69012	-6.56945	5.05×10^-11	6.98×10^-09
TRINITY_DN1750_c0_g1	OVC	OV	1452.94	618.905	1174.93	1.23047	0.187308	6.56921	5.06×10^-11	6.98×10^-09
TRINITY_DN6379_c9_g1	OVC	OV	0	239.602	79.8673	-10.085	1.53568	-6.56715	5.13×10^-11	7.07×10^-09
TRINITY_DN10020_c0_g1	OVC	OV	74.9228	4.00522	51.2836	4.22796	0.643841	6.56678	5.14×10^-11	7.07×10^-09
TRINITY_DN283_c0_g1	OVC	OV	3947.17	378.716	2757.68	3.38174	0.515196	6.56399	5.24×10^-11	7.19×10^-09
TRINITY_DN3896_c1_g1	OVC	OV	561.855	187.669	437.126	1.58203	0.241121	6.56114	5.34×10^-11	7.32×10^-09
TRINITY_DN4019_c0_g1	OVC	OV	2359.95	1115.5	1945.14	1.08143	0.164877	6.55899	5.42×10^-11	7.41×10^-09
TRINITY_DN1098_c0_g1	OVC	OV	1428.47	525.794	1127.58	1.44245	0.220183	6.55114	5.71×10^-11	7.79×10^-09
TRINITY_DN4703_c2_g1	OVC	OV	300.882	105.099	235.621	1.51915	0.231928	6.55009	5.75×10^-11	7.83×10^-09
TRINITY_DN6873_c0_g1	OVC	OV	454.259	111.762	340.093	2.02381	0.309152	6.54634	5.90×10^-11	8.02×10^-09
TRINITY_DN9842_c1_g1	OVC	OV	112.342	25.5032	83.3957	2.1378	0.326755	6.54252	6.05×10^-11	8.21×10^-09
TRINITY_DN4476_c0_g2	OVC	OV	2194.52	923.143	1770.72	1.2491	0.191018	6.53917	6.19×10^-11	8.38×10^-09
TRINITY_DN2933_c0_g1	OVC	OV	1028.62	480.649	845.965	1.09809	0.168062	6.53385	6.41×10^-11	8.67×10^-09
TRINITY_DN20780_c0_g5	OVC	OV	0	256.876	85.6254	-10.1854	1.559	-6.53334	6.43×10^-11	8.68×10^-09
TRINITY_DN98391_c0_g3	OVC	OV	3827.84	0	2551.89	27.4551	4.20605	6.52753	6.69×10^-11	8.99×10^-09
TRINITY_DN3435_c2_g2	OVC	OV	18976.9	1253.85	13069.2	3.91983	0.600571	6.52683	6.72×10^-11	9.02×10^-09
TRINITY_DN10835_c0_g1	OVC	OV	25612.3	8923.38	20049.3	1.52119	0.23309	6.52621	6.75×10^-11	9.04×10^-09
TRINITY_DN27376_c0_g2	OVC	OV	3794.4	0	2529.6	27.443	4.20605	6.52466	6.82×10^-11	9.11×10^-09
TRINITY_DN61200_c3_g1	OVC	OV	0	252.89	84.2967	-10.1629	1.55768	-6.52437	6.83×10^-11	9.11×10^-09
TRINITY_DN3534_c3_g2	OVC	OV	0	260.664	86.8881	-10.2066	1.56475	-6.52278	6.90×10^-11	9.19×10^-09
TRINITY_DN71507_c0_g1	OVC	OV	3742.54	0	2495.03	27.4241	4.20605	6.52015	7.02×10^-11	9.34×10^-09
TRINITY_DN27353_c0_g1	OVC	OV	31.5689	213.813	92.3169	-2.77395	0.425591	-6.51789	7.13×10^-11	9.46×10^-09
TRINITY_DN5537_c0_g2	OVC	OV	802.802	217.361	607.655	1.88388	0.289116	6.516	7.22×10^-11	9.57×10^-09
TRINITY_DN2043_c0_g1	OVC	OV	10.0316	283.923	101.329	-4.8305	0.741581	-6.51379	7.33×10^-11	9.69×10^-09
TRINITY_DN13306_c0_g1	OVC	OV	1020.01	124.704	721.574	3.03138	0.465587	6.51089	7.47×10^-11	9.83×10^-09
TRINITY_DN2815_c5_g1	OVC	OV	0	233.903	77.9678	-10.0503	1.54368	-6.5106	7.49×10^-11	9.83×10^-09
TRINITY_DN5311_c4_g1	OVC	OV	0	233.903	77.9678	-10.0503	1.54368	-6.5106	7.49×10^-11	9.83×10^-09
TRINITY_DN65608_c0_g1	OVC	OV	0	233.903	77.9678	-10.0503	1.54368	-6.5106	7.49×10^-11	9.83×10^-09
TRINITY_DN2671_c0_g1	OVC	OV	2544.8	833.891	1974.49	1.60978	0.247335	6.50851	7.59×10^-11	9.94×10^-09
TRINITY_DN25430_c0_g1	OVC	OV	7668.97	2517.32	5951.75	1.60722	0.247058	6.50545	7.75×10^-11	1.01×10^-08
TRINITY_DN87738_c0_g1	OVC	OV	2.73201	134.269	46.5775	-5.64529	0.869225	-6.49462	8.32×10^-11	1.08×10^-08
TRINITY_DN26412_c0_g1	OVC	OV	99.4628	0	66.3085	9.65443	1.48664	6.49412	8.35×10^-11	1.09×10^-08
TRINITY_DN17839_c0_g1	OVC	OV	0	268.799	89.5998	-10.2509	1.58055	-6.48563	8.84×10^-11	1.14×10^-08
TRINITY_DN3361_c2_g1	OVC	OV	630.538	276.657	512.578	1.18927	0.183374	6.48553	8.84×10^-11	1.14×10^-08
TRINITY_DN2017_c15_g1	OVC	OV	0	231.908	77.3027	-10.0379	1.54877	-6.48122	9.10×10^-11	1.17×10^-08
TRINITY_DN5938_c2_g1	OVC	OV	912.56	74.699	633.273	3.61112	0.557177	6.48111	9.10×10^-11	1.17×10^-08
TRINITY_DN72715_c3_g1	OVC	OV	0	354.572	118.191	-10.6504	1.6436	-6.47994	9.18×10^-11	1.18×10^-08
TRINITY_DN483_c0_g1	OVC	OV	1286.19	197.79	923.393	2.70102	0.417267	6.47312	9.60×10^-11	1.23×10^-08
TRINITY_DN10356_c1_g1	OVC	OV	0	366.875	122.292	-10.6997	1.65332	-6.47163	9.70×10^-11	1.24×10^-08
TRINITY_DN942_c0_g1	OVC	OV	4481.51	1307.24	3423.42	1.77725	0.274991	6.46293	1.03×10^-10	1.31×10^-08
TRINITY_DN48384_c4_g1	OVC	OV	153.296	0	102.198	10.2801	1.59338	6.45177	1.11×10^-10	1.41×10^-08
TRINITY_DN1140_c6_g2	OVC	OV	0	227.52	75.8401	-10.0104	1.55227	-6.44885	1.13×10^-10	1.43×10^-08
TRINITY_DN29534_c0_g5	OVC	OV	0	227.874	75.9579	-10.0126	1.55346	-6.44537	1.15×10^-10	1.46×10^-08
TRINITY_DN3758_c1_g1	OVC	OV	1712.58	406.125	1277.1	2.07574	0.32211	6.44419	1.16×10^-10	1.47×10^-08
TRINITY_DN3334_c0_g1	OVC	OV	851.006	335.122	679.044	1.34454	0.208704	6.44235	1.18×10^-10	1.48×10^-08
TRINITY_DN7617_c0_g2	OVC	OV	12.2083	86.008	36.8082	-2.80214	0.434981	-6.44199	1.18×10^-10	1.48×10^-08
TRINITY_DN53642_c8_g1	OVC	OV	0	345.56	115.187	-10.6133	1.64762	-6.44161	1.18×10^-10	1.48×10^-08
TRINITY_DN63549_c0_g2	OVC	OV	0	345.56	115.187	-10.6133	1.64762	-6.44161	1.18×10^-10	1.48×10^-08
TRINITY_DN6945_c0_g1	OVC	OV	441.223	48.2238	310.224	3.19471	0.49625	6.43769	1.21×10^-10	1.52×10^-08
TRINITY_DN13068_c1_g2	OVC	OV	3103.46	0	2068.97	27.0725	4.20606	6.43656	1.22×10^-10	1.53×10^-08
TRINITY_DN16567_c0_g1	OVC	OV	70.3561	2.67992	47.7974	4.71526	0.732808	6.4345	1.24×10^-10	1.54×10^-08
TRINITY_DN16037_c1_g2	OVC	OV	0	350.876	116.959	-10.6353	1.65294	-6.4342	1.24×10^-10	1.54×10^-08
TRINITY_DN2838_c1_g1	OVC	OV	192.38	43.2393	142.666	2.15275	0.334735	6.4312	1.27×10^-10	1.57×10^-08
TRINITY_DN10106_c4_g1	OVC	OV	0	225.157	75.0523	-9.99529	1.55458	-6.42956	1.28×10^-10	1.59×10^-08
TRINITY_DN12224_c0_g1	OVC	OV	126.209	0	84.1392	9.99817	1.55616	6.4249	1.32×10^-10	1.63×10^-08
TRINITY_DN7893_c0_g1	OVC	OV	32.8491	128.923	64.8738	-1.96127	0.3054	-6.42196	1.35×10^-10	1.66×10^-08
TRINITY_DN2936_c0_g4	OVC	OV	223.781	72.0851	173.216	1.63342	0.25475	6.41185	1.44×10^-10	1.77×10^-08
TRINITY_DN44112_c0_g1	OVC	OV	2.74051	91.1831	32.2214	-4.98256	0.777268	-6.41035	1.45×10^-10	1.79×10^-08
TRINITY_DN4615_c8_g1	OVC	OV	2620.36	0	1746.9	26.9469	4.20606	6.40669	1.49×10^-10	1.82×10^-08
TRINITY_DN21326_c0_g1	OVC	OV	661.296	304.355	542.316	1.11794	0.174506	6.40628	1.49×10^-10	1.82×10^-08
TRINITY_DN5315_c0_g1	OVC	OV	1152.96	3108.27	1804.73	-1.43001	0.223402	-6.40107	1.54×10^-10	1.88×10^-08
TRINITY_DN1558_c1_g1	OVC	OV	42.6899	772.642	286.007	-4.1782	0.652847	-6.39997	1.55×10^-10	1.89×10^-08
TRINITY_DN57037_c0_g1	OVC	OV	0	337.211	112.404	-10.578	1.65331	-6.3981	1.57×10^-10	1.91×10^-08
TRINITY_DN4631_c0_g3	OVC	OV	0	229.892	76.6308	-10.0253	1.56751	-6.39571	1.60×10^-10	1.94×10^-08
TRINITY_DN2293_c1_g1	OVC	OV	134.204	31.209	99.8723	2.10871	0.329984	6.39035	1.66×10^-10	2.00×10^-08
TRINITY_DN51000_c0_g1	OVC	OV	386.561	23.0666	265.396	4.06603	0.636504	6.38807	1.68×10^-10	2.03×10^-08
TRINITY_DN661_c2_g1	OVC	OV	0	346.848	115.616	-10.6187	1.66271	-6.38637	1.70×10^-10	2.05×10^-08
TRINITY_DN105735_c0_g1	OVC	OV	0	222.175	74.0584	-9.97606	1.56229	-6.38553	1.71×10^-10	2.05×10^-08
TRINITY_DN2658_c3_g2	OVC	OV	0	222.175	74.0584	-9.97606	1.56229	-6.38553	1.71×10^-10	2.05×10^-08
TRINITY_DN62953_c0_g3	OVC	OV	0	243.886	81.2952	-10.1106	1.58354	-6.3848	1.72×10^-10	2.06×10^-08
TRINITY_DN128131_c0_g2	OVC	OV	0	236.173	78.7243	-10.0642	1.57639	-6.38433	1.72×10^-10	2.06×10^-08
TRINITY_DN32574_c0_g1	OVC	OV	140.201	5.6765	95.3592	4.62204	0.724266	6.38169	1.75×10^-10	2.10×10^-08
TRINITY_DN12932_c0_g2	OVC	OV	0.689379	128.599	43.326	-7.7367	1.21314	-6.37742	1.80×10^-10	2.15×10^-08
TRINITY_DN39669_c1_g1	OVC	OV	3036.95	0	2024.63	26.809	4.20606	6.3739	1.84×10^-10	2.20×10^-08
TRINITY_DN4547_c1_g1	OVC	OV	1294.79	467.66	1019.08	1.46864	0.23043	6.37346	1.85×10^-10	2.20×10^-08
TRINITY_DN3635_c0_g1	OVC	OV	3054.19	1477.74	2528.71	1.04754	0.164393	6.37217	1.86×10^-10	2.22×10^-08
TRINITY_DN20422_c0_g1	OVC	OV	78.3403	396.126	184.269	-2.33744	0.366847	-6.37169	1.87×10^-10	2.22×10^-08
TRINITY_DN22576_c4_g1	OVC	OV	0.567975	258.603	86.5797	-8.75229	1.37366	-6.37152	1.87×10^-10	2.22×10^-08
TRINITY_DN13949_c1_g1	OVC	OV	10.3357	84.6681	35.1132	-3.01054	0.472554	-6.37079	1.88×10^-10	2.22×10^-08
TRINITY_DN3019_c1_g1	OVC	OV	444.24	1178.01	688.83	-1.40776	0.220971	-6.37076	1.88×10^-10	2.22×10^-08
TRINITY_DN24137_c0_g1	OVC	OV	1091.42	395.945	859.596	1.46188	0.22948	6.37042	1.89×10^-10	2.22×10^-08
TRINITY_DN6957_c0_g1	OVC	OV	59118.8	25651.5	47963.1	1.20458	0.189219	6.36606	1.94×10^-10	2.28×10^-08
TRINITY_DN1168_c1_g1	OVC	OV	0	235.11	78.37	-10.0577	1.58044	-6.36384	1.97×10^-10	2.31×10^-08
TRINITY_DN6946_c1_g2	OVC	OV	0	250.751	83.5837	-10.1506	1.59753	-6.35397	2.10×10^-10	2.46×10^-08
TRINITY_DN9548_c0_g1	OVC	OV	0	286.107	95.3692	-10.3409	1.6279	-6.35231	2.12×10^-10	2.48×10^-08
TRINITY_DN11786_c1_g1	OVC	OV	56.7048	164.852	92.7537	-1.53785	0.242119	-6.35165	2.13×10^-10	2.48×10^-08
TRINITY_DN77517_c5_g1	OVC	OV	2254.97	0	1503.31	26.715	4.20606	6.35155	2.13×10^-10	2.48×10^-08
TRINITY_DN859_c1_g1	OVC	OV	6102.38	2373.73	4859.49	1.36204	0.214481	6.35041	2.15×10^-10	2.50×10^-08
TRINITY_DN41_c0_g2	OVC	OV	261.489	1.0013	174.66	8.02564	1.26461	6.34632	2.21×10^-10	2.56×10^-08
TRINITY_DN3013_c0_g1	OVC	OV	22.494	412.524	152.504	-4.20608	0.663057	-6.34346	2.25×10^-10	2.60×10^-08
TRINITY_DN2117_c0_g2	OVC	OV	3749.69	18515.3	8671.57	-2.30367	0.363166	-6.3433	2.25×10^-10	2.60×10^-08
TRINITY_DN17339_c0_g2	OVC	OV	34.8429	338.842	136.176	-3.29615	0.520247	-6.33573	2.36×10^-10	2.73×10^-08
TRINITY_DN2850_c2_g3	OVC	OV	391.6	36.2229	273.141	3.43528	0.54225	6.33523	2.37×10^-10	2.73×10^-08
TRINITY_DN15813_c4_g1	OVC	OV	237.781	56.0862	177.216	2.08398	0.329023	6.33383	2.39×10^-10	2.75×10^-08
TRINITY_DN8918_c0_g1	OVC	OV	1465.35	450.072	1126.92	1.70332	0.269032	6.33129	2.43×10^-10	2.79×10^-08
TRINITY_DN10314_c0_g2	OVC	OV	2177.82	853.419	1736.36	1.35113	0.213575	6.32626	2.51×10^-10	2.88×10^-08
TRINITY_DN9412_c0_g1	OVC	OV	1743.18	840.059	1442.14	1.05275	0.166453	6.32462	2.54×10^-10	2.91×10^-08
TRINITY_DN4319_c0_g2	OVC	OV	1.73979	173.038	58.8392	-6.77969	1.0721	-6.32374	2.55×10^-10	2.92×10^-08
TRINITY_DN671_c15_g1	OVC	OV	0	251.06	83.6868	-10.1524	1.60601	-6.3215	2.59×10^-10	2.96×10^-08
TRINITY_DN2726_c1_g2	OVC	OV	239.203	0	159.469	10.9228	1.72869	6.31857	2.64×10^-10	3.01×10^-08
TRINITY_DN13389_c5_g1	OVC	OV	1337.3	147.95	940.852	3.17593	0.502716	6.31754	2.66×10^-10	3.02×10^-08
TRINITY_DN127397_c5_g1	OVC	OV	187.739	0	125.16	10.5721	1.67443	6.31384	2.72×10^-10	3.09×10^-08
TRINITY_DN3074_c0_g1	OVC	OV	1901.01	257.729	1353.25	2.88307	0.456701	6.31281	2.74×10^-10	3.11×10^-08
TRINITY_DN4178_c13_g1	OVC	OV	0	280.402	93.4672	-10.3118	1.63402	-6.31071	2.78×10^-10	3.15×10^-08
TRINITY_DN6296_c0_g1	OVC	OV	76890.7	4264.15	52681.8	4.17247	0.661198	6.31047	2.78×10^-10	3.15×10^-08
TRINITY_DN1007_c1_g1	OVC	OV	1483.43	470.425	1145.76	1.65699	0.262778	6.30564	2.87×10^-10	3.24×10^-08
TRINITY_DN3556_c2_g1	OVC	OV	1230.09	495.449	985.21	1.31203	0.2082	6.30177	2.94×10^-10	3.32×10^-08
TRINITY_DN29627_c0_g1	OVC	OV	0	450.468	150.156	-10.9958	1.74534	-6.30007	2.98×10^-10	3.35×10^-08
TRINITY_DN9443_c0_g2	OVC	OV	207.084	75.627	163.265	1.45038	0.230404	6.29494	3.08×10^-10	3.46×10^-08
TRINITY_DN6845_c0_g1	OVC	OV	120.205	24.7966	88.4019	2.28255	0.362732	6.29268	3.12×10^-10	3.50×10^-08
TRINITY_DN3473_c1_g1	OVC	OV	294.809	65.872	218.496	2.16111	0.343453	6.29229	3.13×10^-10	3.50×10^-08
TRINITY_DN52777_c3_g1	OVC	OV	1928.75	0	1285.83	26.4646	4.20607	6.29201	3.13×10^-10	3.50×10^-08
TRINITY_DN4299_c0_g1	OVC	OV	1178.02	4108.15	2154.73	-1.8029	0.286582	-6.29106	3.15×10^-10	3.52×10^-08
TRINITY_DN85859_c0_g1	OVC	OV	265.521	57.6475	196.23	2.20519	0.351426	6.27499	3.50×10^-10	3.90×10^-08
TRINITY_DN19232_c0_g2	OVC	OV	121.927	0	81.2845	9.94987	1.58602	6.2735	3.53×10^-10	3.93×10^-08
TRINITY_DN27396_c1_g2	OVC	OV	1771.44	0	1180.96	26.3767	4.20607	6.27109	3.59×10^-10	3.98×10^-08
TRINITY_DN68598_c0_g2	OVC	OV	0	211.787	70.5956	-9.90697	1.57989	-6.27066	3.60×10^-10	3.99×10^-08
TRINITY_DN74190_c0_g1	OVC	OV	0	241.61	80.5368	-10.097	1.61044	-6.26974	3.62×10^-10	4.01×10^-08
TRINITY_DN57712_c0_g1	OVC	OV	319.259	112.763	250.427	1.49878	0.239162	6.2668	3.69×10^-10	4.08×10^-08
TRINITY_DN908_c0_g1	OVC	OV	9605.34	1268.33	6826.34	2.92096	0.466635	6.25962	3.86×10^-10	4.26×10^-08
TRINITY_DN17574_c0_g1	OVC	OV	392.268	114.773	299.77	1.77398	0.283418	6.25924	3.87×10^-10	4.27×10^-08
TRINITY_DN47362_c0_g2	OVC	OV	1885.64	0	1257.09	26.3167	4.20607	6.25683	3.93×10^-10	4.33×10^-08
TRINITY_DN42384_c0_g1	OVC	OV	0.306168	121.451	40.6878	-8.38342	1.34014	-6.25563	3.96×10^-10	4.35×10^-08
TRINITY_DN2720_c0_g1	OVC	OV	236.198	88.8932	187.096	1.41156	0.22593	6.24777	4.16×10^-10	4.56×10^-08
TRINITY_DN5254_c0_g3	OVC	OV	10.3172	77.291	32.6418	-2.9255	0.468284	-6.24727	4.18×10^-10	4.56×10^-08
TRINITY_DN3167_c1_g1	OVC	OV	0	269.653	89.8842	-10.2555	1.64312	-6.24144	4.34×10^-10	4.72×10^-08
TRINITY_DN37445_c0_g3	OVC	OV	0	269.653	89.8842	-10.2555	1.64312	-6.24144	4.34×10^-10	4.72×10^-08
TRINITY_DN36869_c0_g2	OVC	OV	1678.37	0	1118.92	26.2419	4.20608	6.23905	4.40×10^-10	4.79×10^-08
TRINITY_DN18073_c0_g1	OVC	OV	0	232.065	77.355	-10.0389	1.60966	-6.23664	4.47×10^-10	4.86×10^-08
TRINITY_DN54651_c0_g1	OVC	OV	102.856	17.4561	74.3895	2.55772	0.410546	6.23004	4.66×10^-10	5.05×10^-08
TRINITY_DN30851_c0_g1	OVC	OV	0.612336	255.253	85.4926	-8.71182	1.39838	-6.22992	4.67×10^-10	5.05×10^-08
TRINITY_DN10297_c1_g1	OVC	OV	58.4403	183.508	100.13	-1.6543	0.265813	-6.22355	4.86×10^-10	5.26×10^-08
TRINITY_DN36509_c1_g1	OVC	OV	0	374.63	124.877	-10.7298	1.72659	-6.21445	5.15×10^-10	5.56×10^-08
TRINITY_DN4949_c1_g1	OVC	OV	1485.76	0	990.507	26.1325	4.20608	6.21302	5.20×10^-10	5.59×10^-08
TRINITY_DN9969_c0_g1	OVC	OV	466.679	19.6581	317.672	4.56776	0.735462	6.21074	5.27×10^-10	5.67×10^-08
TRINITY_DN3784_c0_g2	OVC	OV	76.4229	213.871	122.239	-1.49144	0.240164	-6.21012	5.29×10^-10	5.68×10^-08
TRINITY_DN684_c0_g2	OVC	OV	23.3788	274.429	107.062	-3.56915	0.575021	-6.207	5.40×10^-10	5.79×10^-08
TRINITY_DN33209_c9_g1	OVC	OV	834.292	306.461	658.348	1.4435	0.232612	6.2056	5.45×10^-10	5.83×10^-08
TRINITY_DN21056_c0_g1	OVC	OV	4.66536	92.3179	33.8829	-4.34557	0.700421	-6.20422	5.50×10^-10	5.87×10^-08
TRINITY_DN44065_c2_g1	OVC	OV	342.841	129.667	271.783	1.40549	0.226562	6.20358	5.52×10^-10	5.89×10^-08
TRINITY_DN8016_c0_g1	OVC	OV	5.16376	87.26	32.5292	-4.10256	0.661437	-6.20249	5.56×10^-10	5.91×10^-08
TRINITY_DN2793_c0_g4	OVC	OV	70.287	3.3499	47.9746	4.39142	0.708013	6.20245	5.56×10^-10	5.91×10^-08
TRINITY_DN1321_c1_g1	OVC	OV	1369.25	587.853	1108.78	1.22024	0.196774	6.20121	5.60×10^-10	5.95×10^-08
TRINITY_DN2168_c0_g1	OVC	OV	494.411	1095.16	694.661	-1.14729	0.185064	-6.1994	5.67×10^-10	6.01×10^-08
TRINITY_DN4051_c9_g1	OVC	OV	125.071	0	83.3809	9.98925	1.61328	6.19188	5.95×10^-10	6.30×10^-08
TRINITY_DN4274_c0_g1	OVC	OV	1996.39	815.456	1602.75	1.29132	0.208566	6.19141	5.96×10^-10	6.31×10^-08
TRINITY_DN82427_c0_g1	OVC	OV	2.41837	83.6814	29.5061	-5.12916	0.828522	-6.19074	5.99×10^-10	6.31×10^-08
TRINITY_DN4331_c4_g3	OVC	OV	289.329	87.7893	222.149	1.71783	0.277555	6.18916	6.05×10^-10	6.37×10^-08
TRINITY_DN14658_c0_g1	OVC	OV	0	278.126	92.7088	-10.3001	1.66435	-6.18867	6.07×10^-10	6.38×10^-08
TRINITY_DN5575_c0_g1	OVC	OV	3368.07	1431.52	2722.56	1.23435	0.199485	6.18768	6.11×10^-10	6.40×10^-08
TRINITY_DN69380_c0_g1	OVC	OV	0	203.364	67.7881	-9.84843	1.59165	-6.18756	6.11×10^-10	6.40×10^-08
TRINITY_DN8666_c1_g1	OVC	OV	53.4966	200.324	102.439	-1.90165	0.307418	-6.18587	6.18×10^-10	6.46×10^-08
TRINITY_DN6348_c0_g1	OVC	OV	6430.74	1925.91	4929.13	1.73931	0.281241	6.18441	6.23×10^-10	6.51×10^-08
TRINITY_DN46871_c1_g2	OVC	OV	77.4076	0	51.6051	9.29588	1.50366	6.18218	6.32×10^-10	6.60×10^-08
TRINITY_DN9923_c0_g2	OVC	OV	1174.75	150.635	833.377	2.96341	0.479653	6.17823	6.48×10^-10	6.76×10^-08
TRINITY_DN5241_c1_g2	OVC	OV	78.6702	302.36	153.233	-1.9384	0.313937	-6.1745	6.64×10^-10	6.91×10^-08
TRINITY_DN4377_c0_g1	OVC	OV	3002.87	1064.64	2356.8	1.4961	0.242391	6.17227	6.73×10^-10	6.99×10^-08
TRINITY_DN1792_c1_g1	OVC	OV	22.1601	227.029	90.4498	-3.33714	0.540824	-6.17046	6.81×10^-10	7.06×10^-08
TRINITY_DN3142_c0_g1	OVC	OV	3162.44	665.269	2330.05	2.24879	0.364479	6.16987	6.83×10^-10	7.08×10^-08
TRINITY_DN2498_c0_g2	OVC	OV	7208.51	2941.43	5786.15	1.29314	0.209628	6.16876	6.88×10^-10	7.12×10^-08
TRINITY_DN1633_c1_g1	OVC	OV	18.5518	128.982	55.3618	-2.77624	0.450348	-6.16466	7.06×10^-10	7.30×10^-08
TRINITY_DN15735_c4_g1	OVC	OV	1331.4	0	887.598	25.9262	4.20609	6.16398	7.09×10^-10	7.31×10^-08
TRINITY_DN15718_c0_g4	OVC	OV	1279.03	0	852.684	25.925	4.20609	6.16369	7.11×10^-10	7.31×10^-08
TRINITY_DN11540_c0_g2	OVC	OV	272.446	0	181.63	11.1093	1.8024	6.16362	7.11×10^-10	7.31×10^-08
TRINITY_DN1212_c3_g1	OVC	OV	157.389	0	104.926	10.3174	1.67514	6.15913	7.31×10^-10	7.51×10^-08
TRINITY_DN2867_c1_g1	OVC	OV	754.017	97.6029	535.212	2.9492	0.479165	6.15486	7.51×10^-10	7.71×10^-08
TRINITY_DN156_c2_g1	OVC	OV	1946.88	358.056	1417.27	2.44313	0.396975	6.15438	7.54×10^-10	7.71×10^-08
TRINITY_DN8441_c2_g1	OVC	OV	468.499	7.36977	314.79	5.99067	0.973408	6.15433	7.54×10^-10	7.71×10^-08
TRINITY_DN8093_c0_g2	OVC	OV	1717.1	19.7607	1151.32	6.44135	1.0469	6.15278	7.61×10^-10	7.76×10^-08
TRINITY_DN866_c0_g1	OVC	OV	2345.38	969.507	1886.75	1.27449	0.207178	6.15167	7.67×10^-10	7.81×10^-08
TRINITY_DN90170_c1_g5	OVC	OV	0	228.016	76.0053	-10.0135	1.62828	-6.14976	7.76×10^-10	7.89×10^-08
TRINITY_DN3960_c1_g1	OVC	OV	69.6094	0	46.4063	9.13958	1.48634	6.14906	7.79×10^-10	7.92×10^-08
TRINITY_DN6730_c0_g2	OVC	OV	23.757	133.09	60.2013	-2.5033	0.407193	-6.14771	7.86×10^-10	7.97×10^-08
TRINITY_DN1217_c3_g1	OVC	OV	1208.3	0	805.531	25.8452	4.20609	6.14469	8.01×10^-10	8.10×10^-08
TRINITY_DN2191_c9_g1	OVC	OV	0	271.544	90.5146	-10.2656	1.67068	-6.14454	8.02×10^-10	8.10×10^-08
TRINITY_DN78322_c0_g1	OVC	OV	1207.69	0	805.128	25.8387	4.20609	6.14315	8.09×10^-10	8.15×10^-08
TRINITY_DN11213_c6_g1	OVC	OV	0	364.904	121.635	-10.6919	1.7406	-6.14263	8.12×10^-10	8.15×10^-08
TRINITY_DN48101_c2_g1	OVC	OV	0	364.904	121.635	-10.6919	1.7406	-6.14263	8.12×10^-10	8.15×10^-08
TRINITY_DN76100_c0_g1	OVC	OV	19.1314	115.163	51.142	-2.60624	0.424338	-6.14189	8.15×10^-10	8.18×10^-08
TRINITY_DN14843_c3_g1	OVC	OV	0	233.269	77.7562	-10.0463	1.63789	-6.13372	8.58×10^-10	8.60×10^-08
TRINITY_DN4614_c0_g1	OVC	OV	298.769	32.527	210.022	3.20019	0.522034	6.13024	8.77×10^-10	8.77×10^-08
TRINITY_DN780_c1_g1	OVC	OV	258.273	0	172.182	11.0324	1.80035	6.12794	8.90×10^-10	8.89×10^-08
TRINITY_DN9825_c1_g1	OVC	OV	0	198.336	66.1119	-9.81231	1.60194	-6.12528	9.05×10^-10	9.02×10^-08
TRINITY_DN16732_c1_g1	OVC	OV	1140.63	0	760.422	25.7628	4.2061	6.12511	9.06×10^-10	9.02×10^-08
TRINITY_DN62593_c5_g1	OVC	OV	0	497.555	165.852	-11.1392	1.81985	-6.12095	9.30×10^-10	9.25×10^-08
TRINITY_DN33101_c2_g1	OVC	OV	0	315.658	105.219	-10.4827	1.71265	-6.12075	9.31×10^-10	9.25×10^-08
TRINITY_DN6047_c2_g1	OVC	OV	112.901	14.7615	80.1879	2.94029	0.480449	6.11988	9.36×10^-10	9.29×10^-08
TRINITY_DN93111_c0_g1	OVC	OV	9.30076	177.877	65.4929	-4.26047	0.696288	-6.11884	9.43×10^-10	9.34×10^-08
TRINITY_DN9267_c0_g1	OVC	OV	4.88236	85.1973	31.654	-4.10353	0.670875	-6.11668	9.55×10^-10	9.45×10^-08
TRINITY_DN75960_c0_g2	OVC	OV	0	198.026	66.0088	-9.81005	1.60437	-6.11459	9.68×10^-10	9.56×10^-08
TRINITY_DN11260_c4_g1	OVC	OV	7.07234	132.067	48.7371	-4.27265	0.698824	-6.11407	9.71×10^-10	9.58×10^-08
TRINITY_DN14668_c0_g1	OVC	OV	24.9702	290.639	113.526	-3.52429	0.576545	-6.11278	9.79×10^-10	9.64×10^-08
TRINITY_DN10563_c0_g4	OVC	OV	35.1079	155.245	75.1535	-2.1573	0.352946	-6.11227	9.82×10^-10	9.66×10^-08
TRINITY_DN129719_c3_g1	OVC	OV	0	355.819	118.606	-10.6555	1.74355	-6.11136	9.88×10^-10	9.69×10^-08
TRINITY_DN6546_c0_g2	OVC	OV	0	355.819	118.606	-10.6555	1.74355	-6.11136	9.88×10^-10	9.69×10^-08
TRINITY_DN5231_c0_g2	OVC	OV	0	196.591	65.5304	-9.79956	1.60457	-6.10729	1.01×10^-09	9.93×10^-08
TRINITY_DN9091_c0_g1	OVC	OV	134.186	31.8497	100.074	2.07855	0.340353	6.10704	1.01×10^-09	9.93×10^-08
TRINITY_DN951_c0_g1	OVC	OV	3218.53	950.457	2462.51	1.75947	0.288408	6.10063	1.06×10^-09	1.03×10^-07
TRINITY_DN508_c0_g1	OVC	OV	26.994	504.469	186.152	-4.23541	0.694319	-6.10008	1.06×10^-09	1.03×10^-07
TRINITY_DN1281_c0_g1	OVC	OV	809.596	4.37319	541.188	7.5335	1.23503	6.09983	1.06×10^-09	1.03×10^-07
TRINITY_DN8044_c1_g1	OVC	OV	2410.47	999.32	1940.08	1.27018	0.208247	6.09941	1.06×10^-09	1.03×10^-07
TRINITY_DN5380_c1_g1	OVC	OV	257.331	21.1373	178.6	3.60732	0.591581	6.09777	1.08×10^-09	1.04×10^-07
TRINITY_DN26264_c5_g1	OVC	OV	1047.92	0	698.614	25.6466	4.2061	6.09747	1.08×10^-09	1.04×10^-07
TRINITY_DN2739_c0_g1	OVC	OV	236.21	97.1323	189.851	1.28407	0.210608	6.09697	1.08×10^-09	1.05×10^-07
TRINITY_DN95767_c0_g1	OVC	OV	15.5192	234.287	88.442	-3.89843	0.639458	-6.09646	1.08×10^-09	1.05×10^-07
TRINITY_DN2718_c2_g2	OVC	OV	100.551	14.7176	71.9399	2.77658	0.455632	6.0939	1.10×10^-09	1.06×10^-07
TRINITY_DN3166_c1_g1	OVC	OV	366.185	58.1636	263.511	2.65256	0.435367	6.09271	1.11×10^-09	1.07×10^-07
TRINITY_DN1880_c2_g1	OVC	OV	2248.31	188.713	1561.78	3.57456	0.586962	6.08993	1.13×10^-09	1.09×10^-07
TRINITY_DN9911_c0_g1	OVC	OV	716.066	318.58	583.571	1.16909	0.191992	6.08927	1.13×10^-09	1.09×10^-07
TRINITY_DN27376_c0_g1	OVC	OV	1018.08	0	678.722	25.6059	4.20611	6.0878	1.14×10^-09	1.10×10^-07
TRINITY_DN287_c8_g1	OVC	OV	0	196.37	65.4566	-9.79793	1.60954	-6.0874	1.15×10^-09	1.10×10^-07
TRINITY_DN4508_c0_g1	OVC	OV	216.701	32.5563	155.32	2.73676	0.44976	6.08494	1.17×10^-09	1.11×10^-07
TRINITY_DN58955_c0_g3	OVC	OV	72.9459	0	48.6306	9.20829	1.51377	6.083	1.18×10^-09	1.12×10^-07
TRINITY_DN6441_c0_g1	OVC	OV	76.34	225.701	126.127	-1.5693	0.25828	-6.07596	1.23×10^-09	1.17×10^-07
TRINITY_DN13558_c0_g2	OVC	OV	0	494.206	164.735	-11.1295	1.83195	-6.0752	1.24×10^-09	1.18×10^-07
TRINITY_DN1199_c4_g1	OVC	OV	110.43	0	73.62	9.80424	1.61405	6.07432	1.25×10^-09	1.18×10^-07
TRINITY_DN6048_c6_g1	OVC	OV	78.9726	21.7413	59.8955	1.86183	0.30652	6.07411	1.25×10^-09	1.18×10^-07
TRINITY_DN2037_c2_g1	OVC	OV	2510.19	1091.62	2037.33	1.20164	0.197839	6.07384	1.25×10^-09	1.18×10^-07
TRINITY_DN3249_c0_g1	OVC	OV	101.431	18.4061	73.7559	2.466	0.406105	6.07232	1.26×10^-09	1.19×10^-07
TRINITY_DN24115_c8_g1	OVC	OV	0	346.741	115.58	-10.6182	1.74934	-6.06985	1.28×10^-09	1.21×10^-07
TRINITY_DN24641_c7_g1	OVC	OV	0	263.394	87.7981	-10.2216	1.68476	-6.06708	1.30×10^-09	1.23×10^-07
TRINITY_DN70677_c0_g1	OVC	OV	2190.88	872.336	1751.36	1.32871	0.21901	6.0669	1.30×10^-09	1.23×10^-07
TRINITY_DN9109_c9_g1	OVC	OV	0	193.558	64.5193	-9.77713	1.61164	-6.06656	1.31×10^-09	1.23×10^-07
TRINITY_DN128362_c0_g1	OVC	OV	139.851	525.583	268.428	-1.90953	0.314985	-6.0623	1.34×10^-09	1.26×10^-07
TRINITY_DN16377_c2_g1	OVC	OV	0	277.442	92.4806	-10.2966	1.699	-6.06035	1.36×10^-09	1.27×10^-07
TRINITY_DN14672_c2_g1	OVC	OV	6.49816	83.8867	32.2943	-3.72666	0.615023	-6.05939	1.37×10^-09	1.28×10^-07
TRINITY_DN24833_c0_g1	OVC	OV	139.882	16.1381	98.6339	3.11991	0.515339	6.0541	1.41×10^-09	1.32×10^-07
TRINITY_DN49817_c0_g3	OVC	OV	0	250.209	83.4029	-10.1475	1.67629	-6.05353	1.42×10^-09	1.32×10^-07
TRINITY_DN26279_c0_g1	OVC	OV	751.761	227.182	576.901	1.72654	0.285212	6.05351	1.42×10^-09	1.32×10^-07
TRINITY_DN40840_c0_g1	OVC	OV	67.8129	0	45.2086	9.10561	1.50437	6.05278	1.42×10^-09	1.33×10^-07
TRINITY_DN1143_c1_g2	OVC	OV	18.9275	167.571	68.4754	-3.16029	0.522404	-6.04951	1.45×10^-09	1.35×10^-07
TRINITY_DN2807_c0_g2	OVC	OV	355.002	82.4074	264.137	2.10914	0.348734	6.048	1.47×10^-09	1.36×10^-07
TRINITY_DN15773_c0_g1	OVC	OV	0	204.932	68.3105	-9.8595	1.63124	-6.04416	1.50×10^-09	1.39×10^-07
TRINITY_DN2330_c0_g2	OVC	OV	9352.31	3452.76	7385.8	1.43747	0.237907	6.04214	1.52×10^-09	1.41×10^-07
TRINITY_DN11366_c0_g1	OVC	OV	443.651	169.409	352.237	1.38676	0.229517	6.04209	1.52×10^-09	1.41×10^-07
TRINITY_DN1947_c2_g1	OVC	OV	0	238.4	79.4666	-10.0777	1.66876	-6.03907	1.55×10^-09	1.43×10^-07
TRINITY_DN1858_c3_g2	OVC	OV	876.189	0	584.126	25.3959	4.20612	6.03785	1.56×10^-09	1.44×10^-07
TRINITY_DN39010_c4_g1	OVC	OV	170.2	29.5231	123.308	2.52417	0.418268	6.03482	1.59×10^-09	1.47×10^-07
TRINITY_DN2994_c14_g1	OVC	OV	0	192.011	64.0038	-9.76555	1.61836	-6.03424	1.60×10^-09	1.47×10^-07
TRINITY_DN12395_c0_g2	OVC	OV	92.1236	0	61.4157	9.54291	1.58234	6.03089	1.63×10^-09	1.50×10^-07
TRINITY_DN8692_c0_g1	OVC	OV	187.367	4523.5	1632.74	-4.59236	0.76167	-6.02933	1.65×10^-09	1.51×10^-07
TRINITY_DN7676_c0_g1	OVC	OV	5216.69	910.685	3781.36	2.51824	0.41774	6.02824	1.66×10^-09	1.52×10^-07
TRINITY_DN7343_c1_g1	OVC	OV	54.7066	182.352	97.255	-1.73752	0.288317	-6.02641	1.68×10^-09	1.54×10^-07
TRINITY_DN7043_c2_g1	OVC	OV	0	192.807	64.2691	-9.77153	1.62161	-6.02583	1.68×10^-09	1.54×10^-07
TRINITY_DN8120_c3_g1	OVC	OV	1116.53	0	744.351	25.3369	4.2061	6.02385	1.70×10^-09	1.56×10^-07
TRINITY_DN15269_c1_g1	OVC	OV	0	190.657	63.5522	-9.75534	1.61984	-6.0224	1.72×10^-09	1.57×10^-07
TRINITY_DN1743_c4_g1	OVC	OV	0	189.633	63.2111	-9.74757	1.62063	-6.01467	1.80×10^-09	1.64×10^-07
TRINITY_DN2864_c0_g1	OVC	OV	140.167	1884.29	721.542	-3.74914	0.623529	-6.01277	1.82×10^-09	1.66×10^-07
TRINITY_DN24782_c0_g1	OVC	OV	0	469.21	156.403	-11.0546	1.83929	-6.01025	1.85×10^-09	1.68×10^-07
TRINITY_DN3931_c0_g2	OVC	OV	800.54	0	533.694	25.2707	4.20613	6.00807	1.88×10^-09	1.70×10^-07
TRINITY_DN3715_c2_g1	OVC	OV	357.472	149.427	288.123	1.26024	0.209794	6.00705	1.89×10^-09	1.71×10^-07
TRINITY_DN1304_c1_g1	OVC	OV	796.977	275.4	623.118	1.53179	0.255129	6.004	1.93×10^-09	1.74×10^-07
TRINITY_DN10176_c0_g1	OVC	OV	343.455	749.949	478.953	-1.12684	0.187738	-6.00218	1.95×10^-09	1.76×10^-07
TRINITY_DN3020_c0_g2	OVC	OV	354.318	155.876	288.171	1.18585	0.197609	6.00096	1.96×10^-09	1.77×10^-07
TRINITY_DN6532_c0_g1	OVC	OV	510.707	19.3561	346.923	4.72042	0.786805	5.99948	1.98×10^-09	1.79×10^-07
TRINITY_DN4412_c2_g1	OVC	OV	797.614	181.564	592.264	2.13466	0.355828	5.99913	1.98×10^-09	1.79×10^-07
TRINITY_DN5666_c0_g2	OVC	OV	864.689	113.404	614.26	2.93116	0.488641	5.9986	1.99×10^-09	1.79×10^-07
TRINITY_DN1213_c21_g2	OVC	OV	0	329.926	109.975	-10.5465	1.75896	-5.99586	2.02×10^-09	1.82×10^-07
TRINITY_DN3476_c2_g1	OVC	OV	0	277.398	92.4659	-10.2963	1.71728	-5.99571	2.03×10^-09	1.82×10^-07
TRINITY_DN806_c0_g1	OVC	OV	405.018	958	589.346	-1.23977	0.206893	-5.99231	2.07×10^-09	1.85×10^-07
TRINITY_DN7349_c1_g2	OVC	OV	763.445	0	508.963	25.2039	4.20613	5.99218	2.07×10^-09	1.85×10^-07
TRINITY_DN93152_c0_g2	OVC	OV	0	199.368	66.456	-9.8198	1.63928	-5.99031	2.09×10^-09	1.87×10^-07
TRINITY_DN2356_c0_g1	OVC	OV	3991.36	1923.51	3302.08	1.0531	0.175825	5.98949	2.10×10^-09	1.88×10^-07
TRINITY_DN1688_c0_g1	OVC	OV	811.851	261.982	628.562	1.6309	0.272309	5.98915	2.11×10^-09	1.88×10^-07
TRINITY_DN10604_c0_g1	OVC	OV	165.276	19.0688	116.54	3.11768	0.520741	5.98701	2.14×10^-09	1.90×10^-07
TRINITY_DN143_c0_g2	OVC	OV	64.4568	481.12	203.345	-2.90658	0.485648	-5.98496	2.16×10^-09	1.92×10^-07
TRINITY_DN29479_c0_g2	OVC	OV	369.383	62.1835	266.983	2.57104	0.429787	5.98212	2.20×10^-09	1.95×10^-07
TRINITY_DN19106_c3_g1	OVC	OV	735.299	0	490.2	25.1489	4.20613	5.97911	2.24×10^-09	1.98×10^-07
TRINITY_DN2341_c0_g1	OVC	OV	1849.02	724.506	1474.18	1.35116	0.226062	5.97693	2.27×10^-09	2.01×10^-07
TRINITY_DN3982_c0_g3	OVC	OV	432.784	210.071	358.546	1.04537	0.174905	5.97678	2.28×10^-09	2.01×10^-07
TRINITY_DN127528_c0_g1	OVC	OV	0	186.968	62.3227	-9.72715	1.62767	-5.97613	2.29×10^-09	2.01×10^-07
TRINITY_DN8393_c0_g1	OVC	OV	684.711	254.143	541.189	1.42827	0.238998	5.97607	2.29×10^-09	2.01×10^-07
TRINITY_DN6682_c0_g3	OVC	OV	2.01298	93.1271	32.3844	-5.4994	0.920293	-5.97571	2.29×10^-09	2.01×10^-07
TRINITY_DN119309_c0_g1	OVC	OV	0	187.321	62.4405	-9.72988	1.62868	-5.97407	2.31×10^-09	2.03×10^-07
TRINITY_DN84179_c0_g1	OVC	OV	0	187.321	62.4405	-9.72988	1.62868	-5.97407	2.31×10^-09	2.03×10^-07
TRINITY_DN10399_c0_g1	OVC	OV	97212.2	3516.46	65980.3	4.78894	0.802211	5.96967	2.38×10^-09	2.08×10^-07
TRINITY_DN2701_c4_g1	OVC	OV	731.018	152.343	538.127	2.2624	0.379203	5.96618	2.43×10^-09	2.12×10^-07
TRINITY_DN4331_c4_g2	OVC	OV	258.6	79.4695	198.89	1.70497	0.285774	5.96615	2.43×10^-09	2.12×10^-07
TRINITY_DN5489_c0_g1	OVC	OV	40.0604	498.416	192.846	-3.62682	0.608018	-5.96499	2.45×10^-09	2.13×10^-07
TRINITY_DN9217_c2_g1	OVC	OV	0.383211	104.37	35.0455	-8.16476	1.3688	-5.96488	2.45×10^-09	2.13×10^-07
TRINITY_DN59135_c0_g1	OVC	OV	47.1229	135.718	76.6548	-1.52318	0.255421	-5.96342	2.47×10^-09	2.15×10^-07
TRINITY_DN4752_c5_g1	OVC	OV	36.9454	156.171	76.6873	-2.08061	0.348986	-5.96186	2.49×10^-09	2.17×10^-07
TRINITY_DN20113_c0_g3	OVC	OV	81.6677	0	54.4451	9.37173	1.57222	5.96082	2.51×10^-09	2.17×10^-07
TRINITY_DN3933_c1_g1	OVC	OV	1559.82	743.347	1287.66	1.06999	0.179504	5.96078	2.51×10^-09	2.17×10^-07
TRINITY_DN29013_c0_g1	OVC	OV	89.0498	0	59.3665	9.4947	1.59308	5.95995	2.52×10^-09	2.18×10^-07
TRINITY_DN10148_c0_g1	OVC	OV	2081.31	871.534	1678.05	1.25531	0.210638	5.95953	2.53×10^-09	2.19×10^-07
TRINITY_DN5023_c7_g1	OVC	OV	30.1648	155.287	71.8722	-2.37874	0.399186	-5.95897	2.54×10^-09	2.19×10^-07
TRINITY_DN73951_c0_g1	OVC	OV	4378.81	211.86	2989.83	4.36944	0.733446	5.95742	2.56×10^-09	2.21×10^-07
TRINITY_DN19528_c1_g1	OVC	OV	0	230.353	76.7842	-10.0282	1.68373	-5.95595	2.59×10^-09	2.23×10^-07
TRINITY_DN28986_c0_g1	OVC	OV	0	231.03	77.01	-10.0324	1.68512	-5.95354	2.62×10^-09	2.26×10^-07
TRINITY_DN295_c0_g2	OVC	OV	2.6194	70.2818	25.1736	-4.72904	0.794545	-5.95189	2.65×10^-09	2.28×10^-07
TRINITY_DN131380_c0_g1	OVC	OV	671.492	0	447.661	25.0261	4.20614	5.94989	2.68×10^-09	2.30×10^-07
TRINITY_DN27946_c0_g1	OVC	OV	95.5465	23.1106	71.4012	2.0413	0.343108	5.94944	2.69×10^-09	2.31×10^-07
TRINITY_DN6598_c0_g1	OVC	OV	634.948	130.189	466.695	2.28691	0.384615	5.94598	2.75×10^-09	2.35×10^-07
TRINITY_DN1140_c6_g4	OVC	OV	27.797	207.575	87.723	-2.88635	0.48552	-5.94487	2.77×10^-09	2.36×10^-07
TRINITY_DN16215_c0_g2	OVC	OV	660.772	0	440.514	25.0014	4.20615	5.94402	2.78×10^-09	2.37×10^-07
TRINITY_DN14233_c0_g1	OVC	OV	65.5744	0	43.7163	9.05749	1.52389	5.94364	2.79×10^-09	2.38×10^-07
TRINITY_DN9536_c0_g1	OVC	OV	711.463	104.87	509.266	2.7627	0.465032	5.94089	2.83×10^-09	2.41×10^-07
TRINITY_DN2240_c8_g1	OVC	OV	107.954	257.905	157.938	-1.26211	0.212491	-5.93959	2.86×10^-09	2.43×10^-07
TRINITY_DN2232_c0_g2	OVC	OV	648.801	0	432.534	24.9777	4.20615	5.93838	2.88×10^-09	2.45×10^-07
TRINITY_DN3903_c7_g1	OVC	OV	647.489	0	431.659	24.969	4.20615	5.93631	2.92×10^-09	2.47×10^-07
TRINITY_DN2168_c2_g1	OVC	OV	2697.35	1150.21	2181.63	1.22966	0.207152	5.93602	2.92×10^-09	2.48×10^-07
TRINITY_DN2515_c2_g1	OVC	OV	674.472	53.9003	467.615	3.64543	0.614211	5.93514	2.94×10^-09	2.49×10^-07
TRINITY_DN47491_c2_g1	OVC	OV	63.8376	9.7037	45.7929	2.71147	0.456861	5.935	2.94×10^-09	2.49×10^-07
TRINITY_DN100602_c5_g1	OVC	OV	634.474	0	422.983	24.9448	4.20615	5.93056	3.02×10^-09	2.55×10^-07
TRINITY_DN3056_c5_g1	OVC	OV	11188.1	4987.06	9121.07	1.16579	0.196589	5.9301	3.03×10^-09	2.55×10^-07
TRINITY_DN2770_c1_g1	OVC	OV	76.4931	16.3962	56.4608	2.22357	0.37499	5.92968	3.04×10^-09	2.55×10^-07
TRINITY_DN37167_c2_g1	OVC	OV	137.204	0	91.4691	10.1214	1.7074	5.92795	3.07×10^-09	2.58×10^-07
TRINITY_DN88795_c0_g1	OVC	OV	7.21822	70.1939	28.2101	-3.29447	0.555795	-5.9275	3.08×10^-09	2.58×10^-07
TRINITY_DN19843_c0_g1	OVC	OV	46.4953	4.00522	32.3319	3.53884	0.597053	5.92717	3.08×10^-09	2.59×10^-07
TRINITY_DN8652_c0_g5	OVC	OV	9.56443	109.139	42.756	-3.53848	0.597145	-5.92567	3.11×10^-09	2.61×10^-07
TRINITY_DN46165_c1_g1	OVC	OV	667.69	0	445.127	24.9126	4.20614	5.92291	3.16×10^-09	2.65×10^-07
TRINITY_DN1980_c0_g3	OVC	OV	614.703	0	409.802	24.8957	4.20615	5.91888	3.24×10^-09	2.70×10^-07
TRINITY_DN21476_c0_g4	OVC	OV	610.397	0	406.931	24.8925	4.20615	5.91812	3.26×10^-09	2.71×10^-07
TRINITY_DN10950_c0_g1	OVC	OV	611.074	0	407.383	24.888	4.20615	5.91703	3.28×10^-09	2.73×10^-07
TRINITY_DN4234_c0_g1	OVC	OV	797.611	379.349	658.19	1.07315	0.181397	5.91606	3.30×10^-09	2.74×10^-07
TRINITY_DN830_c0_g1	OVC	OV	1724.49	520.847	1323.28	1.7274	0.291996	5.91585	3.30×10^-09	2.74×10^-07
TRINITY_DN849_c5_g1	OVC	OV	261.832	32.8363	185.5	2.99691	0.506717	5.91437	3.33×10^-09	2.76×10^-07
TRINITY_DN57004_c1_g1	OVC	OV	66.2565	0	44.171	9.06847	1.53339	5.91399	3.34×10^-09	2.77×10^-07
TRINITY_DN4382_c1_g2	OVC	OV	595.903	0	397.268	24.8587	4.20616	5.91008	3.42×10^-09	2.83×10^-07
TRINITY_DN5914_c1_g1	OVC	OV	183.427	0	122.285	10.5389	1.78413	5.907	3.48×10^-09	2.88×10^-07
TRINITY_DN6593_c0_g2	OVC	OV	1.73646	258.885	87.4525	-7.2131	1.22146	-5.90532	3.52×10^-09	2.90×10^-07
TRINITY_DN2859_c6_g1	OVC	OV	588.284	0	392.19	24.8355	4.20616	5.90456	3.54×10^-09	2.91×10^-07
TRINITY_DN3522_c0_g2	OVC	OV	712.299	0	474.866	24.8294	4.20614	5.90313	3.57×10^-09	2.93×10^-07
TRINITY_DN16237_c0_g1	OVC	OV	61.5407	2343.93	822.337	-5.24685	0.888906	-5.90259	3.58×10^-09	2.94×10^-07
TRINITY_DN4827_c13_g1	OVC	OV	0	437.86	145.953	-10.9548	1.85618	-5.90181	3.60×10^-09	2.95×10^-07
TRINITY_DN3173_c0_g5	OVC	OV	97.6354	0	65.0903	9.63065	1.632	5.90114	3.61×10^-09	2.96×10^-07
TRINITY_DN11345_c1_g1	OVC	OV	497.147	224.59	406.295	1.14508	0.194075	5.90021	3.63×10^-09	2.97×10^-07
TRINITY_DN15163_c0_g1	OVC	OV	573.363	0	382.242	24.8052	4.20616	5.89734	3.69×10^-09	3.02×10^-07
TRINITY_DN57064_c1_g1	OVC	OV	0	300.3	100.1	-10.4107	1.76564	-5.89632	3.72×10^-09	3.04×10^-07
TRINITY_DN4007_c0_g1	OVC	OV	231.478	86.1986	183.051	1.42708	0.242035	5.89618	3.72×10^-09	3.04×10^-07
TRINITY_DN5715_c3_g1	OVC	OV	0	252.733	84.2444	-10.162	1.72371	-5.89542	3.74×10^-09	3.05×10^-07
TRINITY_DN2101_c1_g1	OVC	OV	767.3	184.949	573.183	2.05305	0.348257	5.8952	3.74×10^-09	3.05×10^-07
TRINITY_DN1695_c1_g1	OVC	OV	567.105	0	378.07	24.7871	4.20616	5.89304	3.79×10^-09	3.08×10^-07
TRINITY_DN25610_c0_g2	OVC	OV	0	224.993	74.9976	-9.99423	1.69625	-5.89197	3.82×10^-09	3.10×10^-07
TRINITY_DN38477_c3_g1	OVC	OV	0	257.718	85.9059	-10.1902	1.7295	-5.89197	3.82×10^-09	3.10×10^-07
TRINITY_DN4614_c0_g2	OVC	OV	431.691	35.5602	299.647	3.60104	0.611345	5.89036	3.85×10^-09	3.12×10^-07
TRINITY_DN14365_c0_g3	OVC	OV	561.623	0	374.415	24.7758	4.20617	5.89034	3.85×10^-09	3.12×10^-07
TRINITY_DN18701_c0_g1	OVC	OV	639.885	270.062	516.611	1.2438	0.211289	5.88674	3.94×10^-09	3.18×10^-07
TRINITY_DN7209_c0_g7	OVC	OV	550.236	124.217	408.23	2.14637	0.364617	5.88665	3.94×10^-09	3.18×10^-07
TRINITY_DN6694_c0_g1	OVC	OV	513.781	244.167	423.91	1.07318	0.18235	5.8853	3.97×10^-09	3.19×10^-07
TRINITY_DN21881_c0_g1	OVC	OV	0	180.268	60.0895	-9.67451	1.64389	-5.88513	3.98×10^-09	3.19×10^-07
TRINITY_DN72423_c2_g1	OVC	OV	0	180.268	60.0895	-9.67451	1.64389	-5.88513	3.98×10^-09	3.19×10^-07
TRINITY_DN3841_c2_g2	OVC	OV	4873.68	278.691	3342.02	4.1282	0.701497	5.88484	3.98×10^-09	3.20×10^-07
TRINITY_DN5312_c4_g1	OVC	OV	13.6282	79.3669	35.5411	-2.52542	0.429185	-5.88421	4.00×10^-09	3.21×10^-07
TRINITY_DN53029_c0_g1	OVC	OV	552.718	0	368.479	24.7483	4.20617	5.88381	4.01×10^-09	3.21×10^-07
TRINITY_DN1973_c0_g1	OVC	OV	1614.54	482.57	1237.21	1.74221	0.296289	5.88012	4.10×10^-09	3.28×10^-07
TRINITY_DN1871_c0_g1	OVC	OV	1241.74	7.02379	830.166	7.46585	1.26978	5.87966	4.11×10^-09	3.28×10^-07
TRINITY_DN86148_c4_g1	OVC	OV	27.1001	172.965	75.7216	-2.69066	0.457832	-5.87697	4.18×10^-09	3.33×10^-07
TRINITY_DN67386_c0_g1	OVC	OV	6.16781	160.371	57.569	-4.69515	0.798982	-5.87642	4.19×10^-09	3.34×10^-07
TRINITY_DN4479_c0_g2	OVC	OV	532.33	0	354.887	24.7007	4.20617	5.8725	4.29×10^-09	3.42×10^-07
TRINITY_DN435_c1_g2	OVC	OV	57.6035	5.33784	40.1816	3.42631	0.583769	5.86929	4.38×10^-09	3.48×10^-07
TRINITY_DN4243_c4_g1	OVC	OV	526.595	0	351.063	24.6866	4.20617	5.86913	4.38×10^-09	3.48×10^-07
TRINITY_DN53440_c0_g2	OVC	OV	421.153	156.436	332.914	1.42766	0.243269	5.86866	4.39×10^-09	3.49×10^-07
TRINITY_DN26745_c0_g1	OVC	OV	9.03475	130.128	49.3993	-3.85766	0.657653	-5.86581	4.47×10^-09	3.54×10^-07
TRINITY_DN3535_c4_g1	OVC	OV	0	200.259	66.7531	-9.82624	1.67552	-5.86457	4.50×10^-09	3.56×10^-07
TRINITY_DN3497_c0_g1	OVC	OV	19555.1	0	13036.8	17.2757	2.94585	5.86441	4.51×10^-09	3.56×10^-07
TRINITY_DN112519_c0_g1	OVC	OV	0	178.943	59.6477	-9.66386	1.64856	-5.86199	4.57×10^-09	3.61×10^-07
TRINITY_DN5851_c0_g3	OVC	OV	0	178.943	59.6477	-9.66386	1.64856	-5.86199	4.57×10^-09	3.61×10^-07
TRINITY_DN8585_c0_g4	OVC	OV	515.7	0	343.8	24.6561	4.20618	5.86189	4.58×10^-09	3.61×10^-07
TRINITY_DN2584_c1_g2	OVC	OV	1143.12	433.581	906.604	1.39804	0.238558	5.86039	4.62×10^-09	3.64×10^-07
TRINITY_DN102867_c2_g1	OVC	OV	0	414.226	138.075	-10.8748	1.85613	-5.85885	4.66×10^-09	3.67×10^-07
TRINITY_DN18939_c1_g2	OVC	OV	511.278	0	340.852	24.6398	4.20618	5.858	4.68×10^-09	3.68×10^-07
TRINITY_DN8142_c5_g1	OVC	OV	63.1458	253.82	126.704	-2.01738	0.344416	-5.8574	4.70×10^-09	3.69×10^-07
TRINITY_DN15349_c0_g1	OVC	OV	0	656.996	218.999	-11.5402	1.97035	-5.85694	4.71×10^-09	3.70×10^-07
TRINITY_DN6530_c0_g3	OVC	OV	15.969	79.3742	37.1041	-2.32702	0.397371	-5.85604	4.74×10^-09	3.71×10^-07
TRINITY_DN2944_c0_g1	OVC	OV	502.111	229.625	411.282	1.12716	0.192488	5.85572	4.75×10^-09	3.71×10^-07
TRINITY_DN8931_c0_g1	OVC	OV	177.251	55.189	136.563	1.68222	0.287282	5.85565	4.75×10^-09	3.71×10^-07
TRINITY_DN1488_c8_g1	OVC	OV	7.4571	110.856	41.9234	-3.85114	0.657743	-5.85508	4.77×10^-09	3.72×10^-07
TRINITY_DN8892_c0_g1	OVC	OV	2.07663	391.826	131.993	-7.5527	1.29008	-5.85445	4.79×10^-09	3.73×10^-07
TRINITY_DN4289_c0_g4	OVC	OV	6.46851	73.3371	28.758	-3.53275	0.603473	-5.85403	4.80×10^-09	3.74×10^-07
TRINITY_DN7500_c0_g1	OVC	OV	48.2714	3.35723	33.3	3.85275	0.658184	5.8536	4.81×10^-09	3.74×10^-07
TRINITY_DN19932_c1_g1	OVC	OV	0	434.034	144.678	-10.9421	1.86949	-5.85301	4.83×10^-09	3.75×10^-07
TRINITY_DN25249_c4_g1	OVC	OV	501.406	0	334.271	24.618	4.20618	5.85282	4.83×10^-09	3.75×10^-07
TRINITY_DN69_c1_g1	OVC	OV	501.862	0	334.575	24.6145	4.20618	5.85198	4.86×10^-09	3.77×10^-07
TRINITY_DN14343_c0_g1	OVC	OV	606.008	211.073	474.363	1.52217	0.260129	5.85162	4.87×10^-09	3.77×10^-07
TRINITY_DN3416_c2_g1	OVC	OV	494.048	0	329.365	24.5962	4.20618	5.84763	4.99×10^-09	3.86×10^-07
TRINITY_DN30843_c2_g1	OVC	OV	64.1807	0	42.7871	9.01884	1.54307	5.84474	5.07×10^-09	3.92×10^-07
TRINITY_DN59_c0_g1	OVC	OV	945.389	60.5048	650.428	3.96599	0.678602	5.84436	5.09×10^-09	3.92×10^-07
TRINITY_DN3373_c3_g1	OVC	OV	58.2373	0	38.8249	8.88384	1.5201	5.84425	5.09×10^-09	3.92×10^-07
TRINITY_DN3210_c0_g2	OVC	OV	10.8823	92.1405	37.9683	-3.09486	0.530212	-5.83702	5.31×10^-09	4.09×10^-07
TRINITY_DN10029_c10_g1	OVC	OV	0	176.58	58.8599	-9.64468	1.65254	-5.83629	5.34×10^-09	4.10×10^-07
TRINITY_DN10753_c0_g1	OVC	OV	0	176.58	58.8599	-9.64468	1.65254	-5.83629	5.34×10^-09	4.10×10^-07
TRINITY_DN14219_c0_g3	OVC	OV	1771.35	196.445	1246.38	3.17286	0.543658	5.83613	5.34×10^-09	4.10×10^-07
TRINITY_DN36065_c0_g1	OVC	OV	665.702	1.34729	444.251	8.95131	1.5338	5.83605	5.35×10^-09	4.10×10^-07
TRINITY_DN22620_c5_g1	OVC	OV	251.188	14.0769	172.151	4.1558	0.712333	5.83407	5.41×10^-09	4.14×10^-07
TRINITY_DN22990_c0_g3	OVC	OV	4367.42	905.435	3213.42	2.26999	0.389117	5.83368	5.42×10^-09	4.15×10^-07
TRINITY_DN50767_c0_g1	OVC	OV	0	585.399	195.133	-11.3737	1.9499	-5.833	5.44×10^-09	4.16×10^-07
TRINITY_DN4544_c7_g1	OVC	OV	78.7035	280.369	145.925	-1.83482	0.314622	-5.83183	5.48×10^-09	4.18×10^-07
TRINITY_DN58132_c0_g4	OVC	OV	470.825	0	313.883	24.5283	4.20619	5.83148	5.49×10^-09	4.18×10^-07
TRINITY_DN331_c0_g3	OVC	OV	773.917	274.206	607.347	1.49589	0.256521	5.83144	5.49×10^-09	4.18×10^-07
TRINITY_DN12413_c0_g3	OVC	OV	2027.67	0	1351.78	14.0061	2.4019	5.83128	5.50×10^-09	4.18×10^-07
TRINITY_DN1889_c3_g1	OVC	OV	469.579	0	313.053	24.5248	4.20619	5.83064	5.52×10^-09	4.20×10^-07
TRINITY_DN51477_c0_g1	OVC	OV	0	196.917	65.6389	-9.80195	1.68141	-5.82959	5.56×10^-09	4.22×10^-07
TRINITY_DN4832_c9_g1	OVC	OV	0	516.482	172.161	-11.193	1.92038	-5.82857	5.59×10^-09	4.24×10^-07
TRINITY_DN57047_c2_g1	OVC	OV	0	404.228	134.743	-10.8395	1.86006	-5.82751	5.63×10^-09	4.26×10^-07
TRINITY_DN11929_c1_g1	OVC	OV	527.053	170.676	408.261	1.62614	0.279068	5.82704	5.64×10^-09	4.27×10^-07
TRINITY_DN54653_c1_g1	OVC	OV	184.941	0	123.294	10.552	1.81121	5.82595	5.68×10^-09	4.29×10^-07
TRINITY_DN30170_c0_g3	OVC	OV	813.849	8.68774	545.462	6.54957	1.12427	5.82563	5.69×10^-09	4.30×10^-07
TRINITY_DN25253_c0_g1	OVC	OV	461.805	0	307.87	24.5011	4.20619	5.82501	5.71×10^-09	4.31×10^-07
TRINITY_DN5759_c2_g1	OVC	OV	0	207.132	69.044	-9.8749	1.69529	-5.82491	5.71×10^-09	4.31×10^-07
TRINITY_DN14525_c2_g2	OVC	OV	1456.78	616.111	1176.56	1.24095	0.213058	5.82446	5.73×10^-09	4.31×10^-07
TRINITY_DN1489_c3_g1	OVC	OV	308.679	854.694	490.684	-1.46642	0.251842	-5.82279	5.79×10^-09	4.35×10^-07
TRINITY_DN3783_c0_g3	OVC	OV	1081.16	188.044	783.455	2.52379	0.433489	5.82205	5.81×10^-09	4.37×10^-07
TRINITY_DN8951_c0_g1	OVC	OV	140.424	355.598	212.148	-1.33943	0.230173	-5.81923	5.91×10^-09	4.44×10^-07
TRINITY_DN49847_c1_g1	OVC	OV	0	186.496	62.1654	-9.7235	1.67106	-5.81876	5.93×10^-09	4.44×10^-07
TRINITY_DN25492_c0_g1	OVC	OV	3.73273	184.244	63.9032	-5.56368	0.956465	-5.81692	5.99×10^-09	4.49×10^-07
TRINITY_DN1528_c1_g3	OVC	OV	25.6936	256.494	102.627	-3.33335	0.573087	-5.81649	6.01×10^-09	4.49×10^-07
TRINITY_DN1247_c4_g1	OVC	OV	444.32	0	296.213	24.4499	4.2062	5.81281	6.14×10^-09	4.58×10^-07
TRINITY_DN9335_c0_g3	OVC	OV	443.372	0	295.581	24.4459	4.2062	5.81187	6.18×10^-09	4.60×10^-07
TRINITY_DN7020_c0_g4	OVC	OV	411.559	41.4727	288.197	3.31177	0.569856	5.81159	6.19×10^-09	4.60×10^-07
TRINITY_DN5836_c1_g2	OVC	OV	38.4197	3.68855	26.8427	3.37256	0.580484	5.80991	6.25×10^-09	4.65×10^-07
TRINITY_DN4581_c5_g1	OVC	OV	44.3911	316.727	135.17	-2.83603	0.488385	-5.80696	6.36×10^-09	4.72×10^-07
TRINITY_DN11021_c2_g1	OVC	OV	6.76876	59.9815	24.5063	-3.18149	0.547909	-5.80659	6.38×10^-09	4.73×10^-07
TRINITY_DN800_c28_g1	OVC	OV	0	380.393	126.798	-10.7518	1.85191	-5.8058	6.41×10^-09	4.75×10^-07
TRINITY_DN5652_c0_g1	OVC	OV	754.576	322.459	610.537	1.22629	0.211223	5.80566	6.41×10^-09	4.75×10^-07
TRINITY_DN17164_c1_g2	OVC	OV	433.839	0	289.226	24.4155	4.2062	5.80463	6.45×10^-09	4.77×10^-07
TRINITY_DN26176_c1_g1	OVC	OV	13.8215	113.181	46.9414	-3.05435	0.526239	-5.80411	6.47×10^-09	4.78×10^-07
TRINITY_DN5961_c5_g1	OVC	OV	433.713	0	289.142	24.4126	4.2062	5.80394	6.48×10^-09	4.78×10^-07
TRINITY_DN2148_c3_g1	OVC	OV	428.282	0	285.522	24.399	4.20621	5.80072	6.60×10^-09	4.87×10^-07
TRINITY_DN29741_c0_g1	OVC	OV	113.551	25.0912	84.0644	2.17894	0.375642	5.80058	6.61×10^-09	4.87×10^-07
TRINITY_DN39450_c1_g1	OVC	OV	158.052	18.7741	111.626	3.07614	0.530328	5.80045	6.61×10^-09	4.87×10^-07
TRINITY_DN5941_c2_g1	OVC	OV	82.3413	8.70973	57.7974	3.24126	0.558844	5.79994	6.63×10^-09	4.87×10^-07
TRINITY_DN13026_c0_g1	OVC	OV	123.309	3.68855	83.4355	5.06006	0.87245	5.79983	6.64×10^-09	4.87×10^-07
TRINITY_DN23751_c0_g1	OVC	OV	426.939	0	284.626	24.3921	4.20621	5.79907	6.67×10^-09	4.89×10^-07
TRINITY_DN5899_c1_g2	OVC	OV	162.054	33.801	119.303	2.25704	0.389354	5.79688	6.76×10^-09	4.95×10^-07
TRINITY_DN12608_c0_g1	OVC	OV	423.409	0	282.273	24.3817	4.20621	5.7966	6.77×10^-09	4.95×10^-07
TRINITY_DN18731_c0_g1	OVC	OV	39.189	421.773	166.717	-3.42831	0.591548	-5.79549	6.81×10^-09	4.98×10^-07
TRINITY_DN22864_c0_g1	OVC	OV	96.6547	506.409	233.239	-2.39432	0.413531	-5.78996	7.04×10^-09	5.14×10^-07
TRINITY_DN40227_c0_g1	OVC	OV	409.457	0	272.971	24.3331	4.20621	5.78504	7.25×10^-09	5.28×10^-07
TRINITY_DN8902_c0_g2	OVC	OV	133.067	991.081	419.072	-2.89929	0.501336	-5.78312	7.33×10^-09	5.34×10^-07
TRINITY_DN46976_c0_g1	OVC	OV	386.573	102.368	291.838	1.91753	0.331584	5.78295	7.34×10^-09	5.34×10^-07
TRINITY_DN110_c1_g2	OVC	OV	327.506	787.441	480.818	-1.26878	0.219409	-5.78271	7.35×10^-09	5.34×10^-07
TRINITY_DN1566_c2_g1	OVC	OV	0	284.854	94.9513	-10.3346	1.78715	-5.7827	7.35×10^-09	5.34×10^-07
TRINITY_DN2938_c0_g3	OVC	OV	524.893	0	349.929	24.3187	4.20617	5.78167	7.40×10^-09	5.36×10^-07
TRINITY_DN7455_c0_g1	OVC	OV	4366.44	1900.95	3544.61	1.19963	0.207524	5.7807	7.44×10^-09	5.39×10^-07
TRINITY_DN8913_c0_g1	OVC	OV	237.32	615.865	363.502	-1.37542	0.23804	-5.7781	7.56×10^-09	5.46×10^-07
TRINITY_DN12441_c0_g1	OVC	OV	400.93	0	267.287	24.303	4.20622	5.77787	7.57×10^-09	5.46×10^-07
TRINITY_DN3198_c2_g1	OVC	OV	54.2682	369.431	159.323	-2.76364	0.478474	-5.77594	7.65×10^-09	5.52×10^-07
TRINITY_DN3949_c0_g1	OVC	OV	689.618	144.289	507.841	2.25779	0.391036	5.77387	7.75×10^-09	5.58×10^-07
TRINITY_DN87749_c2_g1	OVC	OV	0	490.199	163.4	-11.1177	1.92558	-5.77369	7.76×10^-09	5.59×10^-07
TRINITY_DN7391_c6_g1	OVC	OV	394.608	0	263.072	24.2841	4.20622	5.77338	7.77×10^-09	5.59×10^-07
TRINITY_DN3144_c0_g1	OVC	OV	393.965	0	262.643	24.282	4.20622	5.77287	7.79×10^-09	5.60×10^-07
TRINITY_DN8280_c0_g2	OVC	OV	11160.9	5230.24	9184.01	1.09348	0.189514	5.76993	7.93×10^-09	5.69×10^-07
TRINITY_DN28038_c3_g1	OVC	OV	384.814	0	256.543	24.2494	4.20623	5.76511	8.16×10^-09	5.85×10^-07
TRINITY_DN6711_c1_g1	OVC	OV	383.349	0	255.566	24.2437	4.20623	5.76377	8.23×10^-09	5.89×10^-07
TRINITY_DN6673_c0_g1	OVC	OV	80.1506	599.328	253.21	-2.90199	0.503627	-5.76218	8.30×10^-09	5.94×10^-07
TRINITY_DN3467_c2_g1	OVC	OV	375.815	146.755	299.461	1.35423	0.235095	5.76035	8.39×10^-09	6.00×10^-07
TRINITY_DN3053_c3_g2	OVC	OV	378.179	0	252.119	24.2249	4.20623	5.7593	8.45×10^-09	6.03×10^-07
TRINITY_DN72_c2_g3	OVC	OV	376.069	0	250.712	24.2161	4.20623	5.75719	8.55×10^-09	6.10×10^-07
TRINITY_DN21217_c0_g2	OVC	OV	386.916	0	257.944	24.2156	4.20623	5.75709	8.56×10^-09	6.10×10^-07
TRINITY_DN2316_c0_g2	OVC	OV	5864.49	143.722	3957.57	5.3507	0.929526	5.75638	8.59×10^-09	6.12×10^-07
TRINITY_DN24523_c0_g1	OVC	OV	0	183.5	61.1665	-9.70013	1.68563	-5.7546	8.68×10^-09	6.18×10^-07
TRINITY_DN8874_c2_g1	OVC	OV	110.606	19.0907	80.1008	2.53808	0.441222	5.75239	8.80×10^-09	6.26×10^-07
TRINITY_DN6009_c3_g1	OVC	OV	679.211	0	452.807	24.1899	4.20614	5.75108	8.87×10^-09	6.30×10^-07
TRINITY_DN11928_c7_g1	OVC	OV	365.513	0	243.675	24.1767	4.20624	5.74782	9.04×10^-09	6.41×10^-07
TRINITY_DN27454_c3_g1	OVC	OV	0	170.565	56.8549	-9.59468	1.66936	-5.74752	9.06×10^-09	6.41×10^-07
TRINITY_DN58992_c1_g1	OVC	OV	0	170.565	56.8549	-9.59468	1.66936	-5.74752	9.06×10^-09	6.41×10^-07
TRINITY_DN11724_c3_g1	OVC	OV	572.642	0	381.761	24.1654	4.20616	5.74525	9.18×10^-09	6.49×10^-07
TRINITY_DN904_c24_g1	OVC	OV	362.226	0	241.484	24.1597	4.20624	5.74378	9.26×10^-09	6.54×10^-07
TRINITY_DN6431_c2_g1	OVC	OV	361.513	0	241.008	24.1575	4.20624	5.74325	9.29×10^-09	6.55×10^-07
TRINITY_DN1552_c0_g1	OVC	OV	488.336	133.862	370.178	1.86602	0.32494	5.74266	9.32×10^-09	6.57×10^-07
TRINITY_DN11016_c2_g1	OVC	OV	30.1424	109.538	56.6076	-1.8547	0.323003	-5.74207	9.35×10^-09	6.58×10^-07
TRINITY_DN15594_c0_g1	OVC	OV	669.406	254.658	531.157	1.39526	0.243003	5.74173	9.37×10^-09	6.59×10^-07
TRINITY_DN19916_c0_g1	OVC	OV	0	170.727	56.9091	-9.59606	1.67168	-5.74037	9.45×10^-09	6.63×10^-07
TRINITY_DN63053_c1_g6	OVC	OV	0	206.513	68.8378	-9.87058	1.71951	-5.74033	9.45×10^-09	6.63×10^-07
TRINITY_DN8375_c1_g2	OVC	OV	616.922	0	411.281	24.1368	4.20615	5.73845	9.55×10^-09	6.70×10^-07
TRINITY_DN16401_c2_g1	OVC	OV	349.926	0	233.284	24.1161	4.20625	5.7334	9.84×10^-09	6.88×10^-07
TRINITY_DN22879_c0_g1	OVC	OV	354.109	0	236.073	24.1126	4.20624	5.73258	9.89×10^-09	6.91×10^-07
TRINITY_DN13234_c3_g1	OVC	OV	349.266	0	232.844	24.1115	4.20625	5.73231	9.91×10^-09	6.91×10^-07
TRINITY_DN4933_c0_g1	OVC	OV	811.879	394.081	672.613	1.04204	0.181794	5.73197	9.93×10^-09	6.92×10^-07
TRINITY_DN78647_c0_g1	OVC	OV	346.374	0	230.916	24.0992	4.20625	5.72937	1.01×10^-08	7.01×10^-07
TRINITY_DN2451_c0_g1	OVC	OV	344.301	0	229.534	24.0939	4.20625	5.72812	1.02×10^-08	7.05×10^-07
TRINITY_DN7155_c0_g1	OVC	OV	1355.23	496.311	1068.92	1.44872	0.25299	5.72638	1.03×10^-08	7.12×10^-07
TRINITY_DN69496_c1_g1	OVC	OV	342.086	0	228.057	24.084	4.20625	5.72576	1.03×10^-08	7.14×10^-07
TRINITY_DN1591_c1_g1	OVC	OV	0	344.657	114.886	-10.6095	1.85306	-5.72539	1.03×10^-08	7.15×10^-07
TRINITY_DN14428_c0_g2	OVC	OV	341.111	0	227.407	24.0811	4.20625	5.72508	1.03×10^-08	7.15×10^-07
TRINITY_DN17463_c1_g1	OVC	OV	342.177	0	228.118	24.0799	4.20625	5.72479	1.04×10^-08	7.16×10^-07
TRINITY_DN5137_c5_g1	OVC	OV	32.1257	176.14	80.1305	-2.44729	0.427571	-5.72371	1.04×10^-08	7.20×10^-07
TRINITY_DN3253_c3_g1	OVC	OV	132.156	2.70924	89.0072	5.6146	0.98123	5.722	1.05×10^-08	7.26×10^-07
TRINITY_DN53762_c0_g2	OVC	OV	338.304	0	225.536	24.0678	4.20625	5.72192	1.05×10^-08	7.26×10^-07
TRINITY_DN3077_c3_g1	OVC	OV	1.31769	68.3012	23.6455	-5.57348	0.974175	-5.72123	1.06×10^-08	7.28×10^-07
TRINITY_DN5250_c4_g1	OVC	OV	336.094	0	224.063	24.0606	4.20625	5.7202	1.06×10^-08	7.31×10^-07
TRINITY_DN56084_c0_g1	OVC	OV	336.424	0	224.282	24.0601	4.20625	5.72007	1.06×10^-08	7.31×10^-07
TRINITY_DN5322_c0_g1	OVC	OV	6111.8	215.409	4146.34	4.8265	0.843934	5.71905	1.07×10^-08	7.35×10^-07
TRINITY_DN22730_c4_g1	OVC	OV	335.132	0	223.422	24.0527	4.20626	5.71832	1.08×10^-08	7.37×10^-07
TRINITY_DN1298_c0_g1	OVC	OV	2787.67	965.733	2180.36	1.52908	0.267514	5.71588	1.09×10^-08	7.47×10^-07
TRINITY_DN39499_c1_g1	OVC	OV	16.6244	93.5537	42.2675	-2.50777	0.438837	-5.71458	1.10×10^-08	7.52×10^-07
TRINITY_DN24260_c1_g1	OVC	OV	0	272.073	90.691	-10.2683	1.79702	-5.71408	1.10×10^-08	7.53×10^-07
TRINITY_DN30558_c2_g1	OVC	OV	0	272.073	90.691	-10.2683	1.79702	-5.71408	1.10×10^-08	7.53×10^-07
TRINITY_DN24304_c0_g1	OVC	OV	192.762	0.338655	128.621	9.16844	1.60479	5.71317	1.11×10^-08	7.55×10^-07
TRINITY_DN6597_c2_g1	OVC	OV	329.096	0	219.398	24.0311	4.20626	5.71317	1.11×10^-08	7.55×10^-07
TRINITY_DN48658_c1_g1	OVC	OV	0	299.796	99.932	-10.4083	1.82188	-5.71296	1.11×10^-08	7.55×10^-07
TRINITY_DN4676_c4_g1	OVC	OV	0	440.269	146.756	-10.9627	1.91896	-5.71283	1.11×10^-08	7.55×10^-07
TRINITY_DN87077_c1_g1	OVC	OV	327.908	0	218.605	24.0259	4.20626	5.71194	1.12×10^-08	7.59×10^-07
TRINITY_DN360_c1_g1	OVC	OV	330.824	0	220.549	24.0247	4.20626	5.71167	1.12×10^-08	7.59×10^-07
TRINITY_DN11124_c0_g1	OVC	OV	336.49	0	224.327	24.0166	4.20625	5.70974	1.13×10^-08	7.66×10^-07
TRINITY_DN205_c8_g1	OVC	OV	336.49	0	224.327	24.0166	4.20625	5.70974	1.13×10^-08	7.66×10^-07
TRINITY_DN76_c5_g1	OVC	OV	326.353	0	217.568	24.0146	4.20626	5.70926	1.13×10^-08	7.68×10^-07
TRINITY_DN130702_c2_g1	OVC	OV	0	202.817	67.6058	-9.84453	1.72465	-5.70814	1.14×10^-08	7.72×10^-07
TRINITY_DN11123_c5_g1	OVC	OV	51.025	0	34.0167	8.69353	1.52306	5.70794	1.14×10^-08	7.72×10^-07
TRINITY_DN951_c5_g1	OVC	OV	0	173.362	57.7873	-9.61814	1.68517	-5.70753	1.15×10^-08	7.74×10^-07
TRINITY_DN4887_c2_g1	OVC	OV	4106.62	1861.1	3358.11	1.14205	0.200152	5.70592	1.16×10^-08	7.80×10^-07
TRINITY_DN18600_c0_g6	OVC	OV	325.357	0	216.905	23.9947	4.20626	5.70452	1.17×10^-08	7.86×10^-07
TRINITY_DN23743_c0_g1	OVC	OV	319.694	0	213.129	23.9898	4.20627	5.70335	1.17×10^-08	7.91×10^-07
TRINITY_DN46336_c0_g2	OVC	OV	319.518	0	213.012	23.9859	4.20627	5.70243	1.18×10^-08	7.94×10^-07
TRINITY_DN2110_c5_g1	OVC	OV	0	167.215	55.7383	-9.56606	1.67833	-5.69974	1.20×10^-08	8.04×10^-07
TRINITY_DN5310_c12_g1	OVC	OV	0	167.215	55.7383	-9.56606	1.67833	-5.69974	1.20×10^-08	8.04×10^-07
TRINITY_DN91504_c0_g1	OVC	OV	0	167.215	55.7383	-9.56606	1.67833	-5.69974	1.20×10^-08	8.04×10^-07
TRINITY_DN3975_c1_g1	OVC	OV	731.616	78.7116	513.981	3.21677	0.564409	5.69937	1.20×10^-08	8.05×10^-07
TRINITY_DN3524_c2_g1	OVC	OV	316.359	0	210.906	23.9722	4.20627	5.69916	1.20×10^-08	8.06×10^-07
TRINITY_DN29108_c6_g1	OVC	OV	597.102	49.0111	414.405	3.60626	0.633043	5.6967	1.22×10^-08	8.17×10^-07
TRINITY_DN3049_c1_g1	OVC	OV	2614.75	856.333	2028.61	1.61017	0.28266	5.69647	1.22×10^-08	8.17×10^-07
TRINITY_DN6713_c9_g1	OVC	OV	312.565	0	208.376	23.9594	4.20627	5.69611	1.23×10^-08	8.18×10^-07
TRINITY_DN1666_c0_g1	OVC	OV	7019.14	2026.71	5354.99	1.79207	0.314623	5.69593	1.23×10^-08	8.18×10^-07
TRINITY_DN30004_c0_g4	OVC	OV	0	166.177	55.3923	-9.55708	1.67819	-5.69488	1.23×10^-08	8.22×10^-07
TRINITY_DN56913_c0_g1	OVC	OV	0	166.177	55.3923	-9.55708	1.67819	-5.69488	1.23×10^-08	8.22×10^-07
TRINITY_DN20622_c1_g1	OVC	OV	310.98	0	207.32	23.9458	4.20627	5.69288	1.25×10^-08	8.30×10^-07
TRINITY_DN2915_c0_g1	OVC	OV	347.723	55.1817	250.209	2.65378	0.466232	5.69197	1.26×10^-08	8.34×10^-07
TRINITY_DN15882_c0_g3	OVC	OV	1187.1	505.79	959.997	1.22984	0.216082	5.69154	1.26×10^-08	8.35×10^-07
TRINITY_DN3961_c1_g1	OVC	OV	3215.98	17.0148	2149.66	7.56217	1.32906	5.68987	1.27×10^-08	8.42×10^-07
TRINITY_DN37503_c3_g1	OVC	OV	382.504	0	255.003	23.9328	4.20623	5.68985	1.27×10^-08	8.42×10^-07
TRINITY_DN12084_c0_g1	OVC	OV	306.175	0	204.117	23.9305	4.20628	5.68923	1.28×10^-08	8.44×10^-07
TRINITY_DN305_c4_g1	OVC	OV	1276.53	194.986	916.014	2.71039	0.47644	5.68884	1.28×10^-08	8.45×10^-07
TRINITY_DN17390_c0_g5	OVC	OV	1.99368	94.5184	32.8352	-5.52943	0.971978	-5.68884	1.28×10^-08	8.45×10^-07
TRINITY_DN4375_c1_g3	OVC	OV	1252.57	421.071	975.402	1.57332	0.276569	5.6887	1.28×10^-08	8.45×10^-07
TRINITY_DN819_c4_g2	OVC	OV	431.803	0	287.869	23.9218	4.20621	5.68726	1.29×10^-08	8.51×10^-07
TRINITY_DN152_c1_g1	OVC	OV	3967.5	855.486	2930.16	2.2134	0.389203	5.68701	1.29×10^-08	8.52×10^-07
TRINITY_DN13676_c4_g1	OVC	OV	304.258	0	202.839	23.9193	4.20628	5.68658	1.30×10^-08	8.53×10^-07
TRINITY_DN19514_c0_g3	OVC	OV	121.506	0	81.0039	9.94475	1.74904	5.68583	1.30×10^-08	8.56×10^-07
TRINITY_DN2860_c0_g1	OVC	OV	988.129	228.89	735.049	2.11032	0.37122	5.68483	1.31×10^-08	8.59×10^-07
TRINITY_DN42342_c1_g1	OVC	OV	301.444	0	200.963	23.9076	4.20628	5.68379	1.32×10^-08	8.64×10^-07
TRINITY_DN4493_c1_g1	OVC	OV	299.89	0	199.927	23.9011	4.20628	5.68224	1.33×10^-08	8.71×10^-07
TRINITY_DN26136_c0_g2	OVC	OV	586.161	0	390.774	23.8953	4.20616	5.68103	1.34×10^-08	8.76×10^-07
TRINITY_DN34982_c3_g1	OVC	OV	304.329	0	202.886	23.8954	4.20628	5.68088	1.34×10^-08	8.76×10^-07
TRINITY_DN9262_c0_g1	OVC	OV	0	243.288	81.0958	-10.107	1.77957	-5.67947	1.35×10^-08	8.83×10^-07
TRINITY_DN22326_c0_g1	OVC	OV	475.401	151.335	367.379	1.64991	0.290563	5.67833	1.36×10^-08	8.88×10^-07
TRINITY_DN3154_c1_g2	OVC	OV	797.136	298.303	630.859	1.41843	0.249833	5.6775	1.37×10^-08	8.91×10^-07
TRINITY_DN616_c2_g1	OVC	OV	360.48	0	240.32	23.8673	4.20624	5.67427	1.39×10^-08	9.07×10^-07
TRINITY_DN29900_c0_g5	OVC	OV	0	169.977	56.6589	-9.5897	1.69059	-5.6724	1.41×10^-08	9.17×10^-07
TRINITY_DN46079_c0_g1	OVC	OV	291.227	0	194.151	23.8586	4.20629	5.67213	1.41×10^-08	9.17×10^-07
TRINITY_DN90906_c0_g1	OVC	OV	290.214	0	193.476	23.8545	4.20629	5.67114	1.42×10^-08	9.22×10^-07
TRINITY_DN54058_c0_g2	OVC	OV	0	183.539	61.1797	-9.70045	1.71068	-5.67054	1.42×10^-08	9.24×10^-07
TRINITY_DN42777_c1_g1	OVC	OV	289.701	0	193.134	23.8465	4.20629	5.66925	1.43×10^-08	9.30×10^-07
TRINITY_DN1065_c1_g1	OVC	OV	646.003	212.42	501.475	1.60584	0.283273	5.66889	1.44×10^-08	9.31×10^-07
TRINITY_DN591_c1_g5	OVC	OV	592.638	0	395.092	23.8339	4.20616	5.66643	1.46×10^-08	9.44×10^-07
TRINITY_DN13177_c0_g1	OVC	OV	0	506.003	168.668	-11.1635	1.97049	-5.66535	1.47×10^-08	9.49×10^-07
TRINITY_DN3672_c3_g1	OVC	OV	60.2565	242.921	121.145	-2.00698	0.354324	-5.66425	1.48×10^-08	9.54×10^-07
TRINITY_DN20096_c0_g1	OVC	OV	95.1251	0	63.4167	9.59085	1.69329	5.66403	1.48×10^-08	9.55×10^-07
TRINITY_DN1223_c5_g1	OVC	OV	147.676	0	98.4509	10.2273	1.80578	5.66362	1.48×10^-08	9.56×10^-07
TRINITY_DN57181_c0_g2	OVC	OV	381.252	0	254.168	23.8214	4.20623	5.66337	1.48×10^-08	9.57×10^-07
TRINITY_DN7108_c8_g1	OVC	OV	283.949	0	189.299	23.8208	4.2063	5.66312	1.49×10^-08	9.57×10^-07
TRINITY_DN1254_c4_g1	OVC	OV	7.6821	451.453	155.606	-5.91146	1.04401	-5.66226	1.49×10^-08	9.61×10^-07
TRINITY_DN96256_c0_g4	OVC	OV	282.575	0	188.383	23.8138	4.2063	5.66147	1.50×10^-08	9.65×10^-07
TRINITY_DN5564_c3_g2	OVC	OV	215.566	545.194	325.442	-1.33796	0.236401	-5.65969	1.52×10^-08	9.74×10^-07
TRINITY_DN1492_c9_g1	OVC	OV	0	221.015	73.6718	-9.96851	1.76141	-5.6594	1.52×10^-08	9.74×10^-07
TRINITY_DN9971_c2_g1	OVC	OV	0	221.015	73.6718	-9.96851	1.76141	-5.6594	1.52×10^-08	9.74×10^-07
TRINITY_DN78194_c0_g3	OVC	OV	279.593	0	186.396	23.8012	4.2063	5.65847	1.53×10^-08	9.78×10^-07
TRINITY_DN23842_c0_g1	OVC	OV	349.732	0	233.155	23.7998	4.20625	5.6582	1.53×10^-08	9.79×10^-07
TRINITY_DN16093_c0_g3	OVC	OV	200.094	0	133.396	10.6647	1.8854	5.65646	1.55×10^-08	9.88×10^-07
TRINITY_DN29299_c0_g1	OVC	OV	332.723	0	221.815	23.7899	4.20626	5.65583	1.55×10^-08	9.91×10^-07
TRINITY_DN4739_c1_g1	OVC	OV	276.942	0	184.628	23.7894	4.2063	5.65565	1.55×10^-08	9.91×10^-07
TRINITY_DN7639_c5_g1	OVC	OV	276.227	0	184.151	23.7788	4.2063	5.65313	1.58×10^-08	1.00×10^-06
TRINITY_DN7050_c0_g2	OVC	OV	5168.92	1140.98	3826.27	2.17946	0.385533	5.65311	1.58×10^-08	1.00×10^-06
TRINITY_DN2480_c1_g3	OVC	OV	275.256	0	183.504	23.7782	4.2063	5.653	1.58×10^-08	1.00×10^-06
TRINITY_DN101647_c0_g1	OVC	OV	274.986	0	183.324	23.7781	4.2063	5.65297	1.58×10^-08	1.00×10^-06
TRINITY_DN11563_c2_g1	OVC	OV	273.278	0	182.185	23.7718	4.20631	5.65147	1.59×10^-08	1.01×10^-06
TRINITY_DN8322_c1_g2	OVC	OV	273.278	0	182.185	23.7718	4.20631	5.65147	1.59×10^-08	1.01×10^-06
TRINITY_DN9359_c0_g3	OVC	OV	6199.52	897.428	4432.16	2.78818	0.493374	5.65126	1.59×10^-08	1.01×10^-06
TRINITY_DN91842_c0_g1	OVC	OV	43.5737	0	29.0491	8.46357	1.49772	5.65097	1.60×10^-08	1.01×10^-06
TRINITY_DN9553_c2_g1	OVC	OV	272.571	0	181.714	23.7688	4.20631	5.65076	1.60×10^-08	1.01×10^-06
TRINITY_DN13671_c1_g1	OVC	OV	271.901	0	181.267	23.7636	4.20631	5.64951	1.61×10^-08	1.02×10^-06
TRINITY_DN18091_c1_g1	OVC	OV	271.901	0	181.267	23.7636	4.20631	5.64951	1.61×10^-08	1.02×10^-06
TRINITY_DN48064_c0_g1	OVC	OV	272.587	0	181.725	23.763	4.20631	5.64938	1.61×10^-08	1.02×10^-06
TRINITY_DN3218_c0_g1	OVC	OV	5174.07	1336.31	3894.82	1.9532	0.345743	5.64928	1.61×10^-08	1.02×10^-06
TRINITY_DN77374_c4_g1	OVC	OV	3.34737	75.9217	27.5388	-4.523	0.800659	-5.6491	1.61×10^-08	1.02×10^-06
TRINITY_DN6143_c6_g1	OVC	OV	269.23	0	179.486	23.7516	4.20631	5.64666	1.64×10^-08	1.03×10^-06
TRINITY_DN9295_c4_g1	OVC	OV	20.5827	175.609	72.2582	-3.10694	0.55035	-5.6454	1.65×10^-08	1.04×10^-06
TRINITY_DN20882_c0_g1	OVC	OV	268.957	0	179.305	23.7455	4.20631	5.64522	1.65×10^-08	1.04×10^-06
TRINITY_DN22746_c6_g1	OVC	OV	0	163.526	54.5087	-9.53388	1.68894	-5.64489	1.65×10^-08	1.04×10^-06
TRINITY_DN50665_c0_g2	OVC	OV	0	163.526	54.5087	-9.53388	1.68894	-5.64489	1.65×10^-08	1.04×10^-06
TRINITY_DN5161_c2_g1	OVC	OV	0	163.526	54.5087	-9.53388	1.68894	-5.64489	1.65×10^-08	1.04×10^-06
TRINITY_DN37081_c0_g2	OVC	OV	674.38	192.461	513.74	1.80955	0.320602	5.64421	1.66×10^-08	1.04×10^-06
TRINITY_DN6933_c2_g1	OVC	OV	1.23806	65.3266	22.6009	-5.77046	1.02252	-5.64338	1.67×10^-08	1.04×10^-06
TRINITY_DN520_c0_g1	OVC	OV	160.404	788.709	369.839	-2.3017	0.407944	-5.64218	1.68×10^-08	1.05×10^-06
TRINITY_DN14868_c0_g4	OVC	OV	265.162	0	176.774	23.7302	4.20631	5.64156	1.69×10^-08	1.05×10^-06
TRINITY_DN2596_c0_g1	OVC	OV	799.935	321.634	640.502	1.31528	0.23315	5.64137	1.69×10^-08	1.05×10^-06
TRINITY_DN117461_c0_g1	OVC	OV	0	259.631	86.5436	-10.2008	1.80859	-5.64021	1.70×10^-08	1.06×10^-06
TRINITY_DN2273_c1_g1	OVC	OV	42.8934	169.364	85.0503	-1.98642	0.352217	-5.63978	1.70×10^-08	1.06×10^-06
TRINITY_DN56104_c0_g1	OVC	OV	0	167.31	55.77	-9.56688	1.69632	-5.63977	1.70×10^-08	1.06×10^-06
TRINITY_DN12937_c4_g1	OVC	OV	264.356	0	176.237	23.7225	4.20632	5.63973	1.70×10^-08	1.06×10^-06
TRINITY_DN5849_c5_g1	OVC	OV	43.7268	133.989	73.814	-1.62743	0.288582	-5.63941	1.71×10^-08	1.06×10^-06
TRINITY_DN11629_c0_g3	OVC	OV	153.773	0	102.515	10.2847	1.82382	5.63909	1.71×10^-08	1.06×10^-06
TRINITY_DN26393_c0_g2	OVC	OV	61.9579	0	41.3053	8.97245	1.59128	5.63851	1.72×10^-08	1.06×10^-06
TRINITY_DN10673_c4_g1	OVC	OV	0	648.219	216.073	-11.5208	2.04362	-5.63744	1.73×10^-08	1.07×10^-06
TRINITY_DN1662_c3_g1	OVC	OV	0	222.996	74.332	-9.98138	1.7706	-5.63728	1.73×10^-08	1.07×10^-06
TRINITY_DN5498_c0_g1	OVC	OV	406.637	143.008	318.76	1.50646	0.267375	5.63424	1.76×10^-08	1.09×10^-06
TRINITY_DN47421_c0_g1	OVC	OV	262.416	0	174.944	23.6989	4.20632	5.63412	1.76×10^-08	1.09×10^-06
TRINITY_DN28981_c0_g1	OVC	OV	564.857	0	376.571	23.6919	4.20616	5.63266	1.77×10^-08	1.09×10^-06
TRINITY_DN47528_c0_g1	OVC	OV	259.097	0	172.731	23.6923	4.20632	5.63254	1.78×10^-08	1.09×10^-06
TRINITY_DN5759_c10_g1	OVC	OV	497.555	0	331.703	23.6914	4.20618	5.63253	1.78×10^-08	1.09×10^-06
TRINITY_DN75411_c2_g1	OVC	OV	257.694	0	171.796	23.69	4.20632	5.632	1.78×10^-08	1.10×10^-06
TRINITY_DN11799_c0_g1	OVC	OV	257.192	0	171.461	23.6872	4.20632	5.63133	1.79×10^-08	1.10×10^-06
TRINITY_DN54732_c0_g5	OVC	OV	257.518	0	171.679	23.6846	4.20632	5.63071	1.79×10^-08	1.10×10^-06
TRINITY_DN2974_c10_g1	OVC	OV	256.956	0	171.304	23.6836	4.20632	5.63046	1.80×10^-08	1.10×10^-06
TRINITY_DN3528_c1_g1	OVC	OV	795.431	242.606	611.156	1.71221	0.304186	5.62883	1.81×10^-08	1.11×10^-06
TRINITY_DN5051_c6_g1	OVC	OV	0	210.391	70.1304	-9.89744	1.75837	-5.62877	1.82×10^-08	1.11×10^-06
TRINITY_DN9170_c0_g1	OVC	OV	429.682	204.424	354.596	1.07214	0.190494	5.62818	1.82×10^-08	1.11×10^-06
TRINITY_DN5022_c3_g1	OVC	OV	253.96	0	169.307	23.6696	4.20633	5.62713	1.83×10^-08	1.12×10^-06
TRINITY_DN43543_c0_g4	OVC	OV	253.391	0	168.928	23.6669	4.20633	5.62649	1.84×10^-08	1.12×10^-06
TRINITY_DN1266_c6_g1	OVC	OV	252.971	0	168.647	23.6641	4.20633	5.62584	1.85×10^-08	1.13×10^-06
TRINITY_DN88488_c0_g1	OVC	OV	252.524	0	168.349	23.662	4.20633	5.62533	1.85×10^-08	1.13×10^-06
TRINITY_DN2286_c2_g1	OVC	OV	253.524	0	169.016	23.6612	4.20633	5.62514	1.85×10^-08	1.13×10^-06
TRINITY_DN39888_c1_g2	OVC	OV	253.524	0	169.016	23.6612	4.20633	5.62514	1.85×10^-08	1.13×10^-06
TRINITY_DN124201_c0_g4	OVC	OV	251.871	0	167.914	23.6568	4.20633	5.62411	1.86×10^-08	1.13×10^-06
TRINITY_DN2731_c8_g1	OVC	OV	0	208.957	69.6524	-9.88755	1.75839	-5.62307	1.88×10^-08	1.14×10^-06
TRINITY_DN316_c4_g1	OVC	OV	61.1061	160.132	94.1149	-1.39467	0.248059	-5.62235	1.88×10^-08	1.14×10^-06
TRINITY_DN2975_c2_g1	OVC	OV	2.98043	45.5732	17.178	-3.94207	0.701218	-5.62175	1.89×10^-08	1.15×10^-06
TRINITY_DN42114_c0_g1	OVC	OV	253.551	0	169.034	23.6464	4.20633	5.62163	1.89×10^-08	1.15×10^-06
TRINITY_DN108230_c2_g1	OVC	OV	249.226	0	166.151	23.6424	4.20633	5.62066	1.90×10^-08	1.15×10^-06
TRINITY_DN46683_c0_g1	OVC	OV	557.496	0	371.664	23.6402	4.20617	5.62037	1.91×10^-08	1.15×10^-06
TRINITY_DN59592_c0_g2	OVC	OV	0	216.34	72.1134	-9.93767	1.76836	-5.61972	1.91×10^-08	1.16×10^-06
TRINITY_DN66022_c5_g1	OVC	OV	0	216.34	72.1134	-9.93767	1.76836	-5.61972	1.91×10^-08	1.16×10^-06
TRINITY_DN3999_c0_g1	OVC	OV	20634.4	8.01776	13759	11.3294	2.01615	5.61934	1.92×10^-08	1.16×10^-06
TRINITY_DN94088_c1_g1	OVC	OV	248.855	0	165.903	23.636	4.20633	5.61915	1.92×10^-08	1.16×10^-06
TRINITY_DN25944_c0_g2	OVC	OV	264.912	0	176.608	23.6332	4.20632	5.6185	1.93×10^-08	1.16×10^-06
TRINITY_DN25290_c8_g1	OVC	OV	0	167.332	55.7774	-9.56707	1.70296	-5.61792	1.93×10^-08	1.16×10^-06
TRINITY_DN297_c11_g1	OVC	OV	246.558	0	164.372	23.6287	4.20634	5.61741	1.94×10^-08	1.17×10^-06
TRINITY_DN1114_c10_g1	OVC	OV	0	161.163	53.721	-9.51288	1.69387	-5.61607	1.95×10^-08	1.17×10^-06
TRINITY_DN75965_c0_g2	OVC	OV	0	161.163	53.721	-9.51288	1.69387	-5.61607	1.95×10^-08	1.17×10^-06
TRINITY_DN3802_c0_g1	OVC	OV	245.772	0	163.848	23.6226	4.20634	5.61596	1.95×10^-08	1.17×10^-06
TRINITY_DN9404_c1_g1	OVC	OV	245.165	0	163.443	23.6202	4.20634	5.61539	1.96×10^-08	1.18×10^-06
TRINITY_DN8329_c0_g2	OVC	OV	633.832	248.91	505.525	1.34955	0.240439	5.61289	1.99×10^-08	1.19×10^-06
TRINITY_DN1029_c2_g1	OVC	OV	242.731	0	161.821	23.6069	4.20634	5.61221	2.00×10^-08	1.20×10^-06
TRINITY_DN101816_c0_g2	OVC	OV	0	325.853	108.618	-10.5286	1.87628	-5.61141	2.01×10^-08	1.20×10^-06
TRINITY_DN6571_c10_g1	OVC	OV	242.079	0	161.386	23.6033	4.20634	5.61137	2.01×10^-08	1.20×10^-06
TRINITY_DN3693_c12_g1	OVC	OV	242.715	0	161.81	23.603	4.20634	5.61128	2.01×10^-08	1.20×10^-06
TRINITY_DN65900_c6_g1	OVC	OV	242.674	0	161.783	23.6028	4.20634	5.61124	2.01×10^-08	1.20×10^-06
TRINITY_DN12691_c1_g1	OVC	OV	6.87057	51.2497	21.6636	-2.90826	0.518342	-5.61069	2.02×10^-08	1.20×10^-06
TRINITY_DN97968_c0_g1	OVC	OV	242.058	0	161.372	23.6004	4.20634	5.61067	2.02×10^-08	1.20×10^-06
TRINITY_DN26502_c4_g1	OVC	OV	0	253.91	84.6368	-10.1687	1.81243	-5.61051	2.02×10^-08	1.20×10^-06
TRINITY_DN3012_c3_g1	OVC	OV	6457.23	2913.33	5275.93	1.14806	0.204644	5.61	2.02×10^-08	1.20×10^-06
TRINITY_DN104100_c0_g1	OVC	OV	241.182	0	160.788	23.5965	4.20634	5.60975	2.03×10^-08	1.20×10^-06
TRINITY_DN328_c7_g1	OVC	OV	377.688	0	251.792	11.5819	2.06466	5.60957	2.03×10^-08	1.20×10^-06
TRINITY_DN8715_c3_g2	OVC	OV	42.3601	3.68855	29.4696	3.51709	0.627073	5.60875	2.04×10^-08	1.21×10^-06
TRINITY_DN48739_c0_g2	OVC	OV	0	248.845	82.9484	-10.1396	1.80782	-5.60874	2.04×10^-08	1.21×10^-06
TRINITY_DN3860_c0_g2	OVC	OV	238.092	0	158.728	23.5761	4.20635	5.60488	2.08×10^-08	1.23×10^-06
TRINITY_DN2832_c8_g1	OVC	OV	236.607	0	157.738	23.5701	4.20635	5.60345	2.10×10^-08	1.24×10^-06
TRINITY_DN8825_c1_g1	OVC	OV	598.37	237.879	478.206	1.33135	0.237629	5.60266	2.11×10^-08	1.25×10^-06
TRINITY_DN25998_c0_g1	OVC	OV	3.40482	110.783	39.1974	-4.99213	0.891327	-5.60079	2.13×10^-08	1.26×10^-06
TRINITY_DN6491_c6_g1	OVC	OV	0	421.473	140.491	-10.8998	1.94647	-5.59977	2.15×10^-08	1.26×10^-06
TRINITY_DN113919_c0_g2	OVC	OV	233.755	0	155.837	23.5545	4.20635	5.59973	2.15×10^-08	1.26×10^-06
TRINITY_DN54183_c1_g1	OVC	OV	234.781	0	156.521	23.5544	4.20635	5.59972	2.15×10^-08	1.26×10^-06
TRINITY_DN38523_c1_g3	OVC	OV	0	353.218	117.739	-10.6449	1.90134	-5.59864	2.16×10^-08	1.27×10^-06
TRINITY_DN8130_c0_g2	OVC	OV	232.836	0	155.224	23.549	4.20635	5.59843	2.16×10^-08	1.27×10^-06
TRINITY_DN101093_c0_g1	OVC	OV	232.485	0	154.99	23.5472	4.20635	5.598	2.17×10^-08	1.27×10^-06
TRINITY_DN961_c6_g1	OVC	OV	232.494	0	154.996	23.5424	4.20635	5.59686	2.18×10^-08	1.28×10^-06
TRINITY_DN8016_c6_g1	OVC	OV	1.94082	90.7052	31.529	-5.63019	1.00598	-5.59669	2.18×10^-08	1.28×10^-06
TRINITY_DN5760_c5_g1	OVC	OV	231.57	0	154.38	23.5414	4.20636	5.59663	2.19×10^-08	1.28×10^-06
TRINITY_DN62369_c1_g1	OVC	OV	231.017	0	154.011	23.538	4.20636	5.5958	2.20×10^-08	1.29×10^-06
TRINITY_DN3053_c0_g2	OVC	OV	219.874	95.5124	178.42	1.19932	0.214331	5.59565	2.20×10^-08	1.29×10^-06
TRINITY_DN408_c3_g1	OVC	OV	328.405	0	218.937	23.5345	4.20626	5.5951	2.20×10^-08	1.29×10^-06
TRINITY_DN56017_c0_g2	OVC	OV	230.796	0	153.864	23.5343	4.20636	5.59494	2.21×10^-08	1.29×10^-06
TRINITY_DN17365_c0_g1	OVC	OV	229.905	0	153.27	23.5314	4.20636	5.59425	2.22×10^-08	1.29×10^-06
TRINITY_DN2827_c0_g1	OVC	OV	1009.87	412.369	810.702	1.29261	0.23109	5.59351	2.23×10^-08	1.30×10^-06
TRINITY_DN38241_c2_g2	OVC	OV	0	177.185	59.0618	-9.64962	1.72516	-5.59348	2.23×10^-08	1.30×10^-06
TRINITY_DN6310_c2_g1	OVC	OV	229.478	0	152.985	23.5277	4.20636	5.59337	2.23×10^-08	1.30×10^-06
TRINITY_DN50502_c0_g1	OVC	OV	230.02	0	153.347	23.5268	4.20636	5.59316	2.23×10^-08	1.30×10^-06
TRINITY_DN12509_c0_g4	OVC	OV	0	166.338	55.446	-9.55847	1.70896	-5.59314	2.23×10^-08	1.30×10^-06
TRINITY_DN51813_c2_g1	OVC	OV	228.947	0	152.632	23.5256	4.20636	5.59285	2.23×10^-08	1.30×10^-06
TRINITY_DN100602_c1_g1	OVC	OV	228.756	0	152.504	23.5244	4.20636	5.59259	2.24×10^-08	1.30×10^-06
TRINITY_DN4322_c2_g1	OVC	OV	228.691	0	152.461	23.5217	4.20636	5.59195	2.25×10^-08	1.30×10^-06
TRINITY_DN10117_c0_g1	OVC	OV	71.7922	286.848	143.477	-1.98972	0.355819	-5.59194	2.25×10^-08	1.30×10^-06
TRINITY_DN100631_c0_g1	OVC	OV	228.455	0	152.304	23.5213	4.20636	5.59184	2.25×10^-08	1.30×10^-06
TRINITY_DN8067_c0_g5	OVC	OV	232.829	0	155.219	23.5212	4.20635	5.59181	2.25×10^-08	1.30×10^-06
TRINITY_DN1498_c6_g1	OVC	OV	777.686	370.573	641.982	1.07024	0.191422	5.59098	2.26×10^-08	1.31×10^-06
TRINITY_DN16123_c0_g2	OVC	OV	238.456	0	158.971	23.5158	4.20635	5.59054	2.26×10^-08	1.31×10^-06
TRINITY_DN21142_c0_g2	OVC	OV	228.028	0	152.019	23.515	4.20636	5.59035	2.27×10^-08	1.31×10^-06
TRINITY_DN41156_c0_g5	OVC	OV	227.295	0	151.53	23.5137	4.20636	5.59002	2.27×10^-08	1.31×10^-06
TRINITY_DN3048_c21_g1	OVC	OV	776.48	337.933	630.298	1.19921	0.214553	5.58934	2.28×10^-08	1.31×10^-06
TRINITY_DN7102_c2_g1	OVC	OV	160.607	32.1224	117.779	2.32498	0.415999	5.5889	2.29×10^-08	1.32×10^-06
TRINITY_DN2783_c0_g1	OVC	OV	677.015	307.299	553.776	1.13841	0.203777	5.58655	2.32×10^-08	1.33×10^-06
TRINITY_DN3246_c1_g1	OVC	OV	1589.56	403.363	1194.16	1.97826	0.354146	5.58601	2.32×10^-08	1.34×10^-06
TRINITY_DN32125_c0_g2	OVC	OV	0	159.506	53.1688	-9.49797	1.7005	-5.58541	2.33×10^-08	1.34×10^-06
TRINITY_DN34362_c1_g1	OVC	OV	2.67094	122.01	42.4505	-5.44418	0.974719	-5.58538	2.33×10^-08	1.34×10^-06
TRINITY_DN131846_c1_g1	OVC	OV	0	615.17	205.057	-11.4453	2.04925	-5.58512	2.34×10^-08	1.34×10^-06
TRINITY_DN1592_c1_g1	OVC	OV	223.413	0	148.942	23.4913	4.20637	5.58471	2.34×10^-08	1.34×10^-06
TRINITY_DN1873_c3_g1	OVC	OV	3096.66	1100.4	2431.24	1.49256	0.267321	5.58341	2.36×10^-08	1.35×10^-06
TRINITY_DN5108_c4_g1	OVC	OV	223.403	0	148.935	23.4854	4.20637	5.5833	2.36×10^-08	1.35×10^-06
TRINITY_DN13614_c0_g2	OVC	OV	0	248.19	82.73	-10.1358	1.81644	-5.58004	2.40×10^-08	1.37×10^-06
TRINITY_DN38185_c3_g1	OVC	OV	220.104	0	146.736	23.4704	4.20637	5.57971	2.41×10^-08	1.38×10^-06
TRINITY_DN119386_c0_g1	OVC	OV	219.943	0	146.629	23.4696	4.20637	5.57953	2.41×10^-08	1.38×10^-06
TRINITY_DN9259_c1_g1	OVC	OV	2.07072	51.8684	18.67	-4.6453	0.833194	-5.5753	2.47×10^-08	1.41×10^-06
TRINITY_DN1338_c21_g1	OVC	OV	216.898	0	144.598	23.4499	4.20638	5.57483	2.48×10^-08	1.41×10^-06
TRINITY_DN3755_c1_g1	OVC	OV	216.898	0	144.598	23.4499	4.20638	5.57483	2.48×10^-08	1.41×10^-06
TRINITY_DN3643_c2_g1	OVC	OV	92.2904	495.062	226.548	-2.4291	0.435739	-5.57467	2.48×10^-08	1.41×10^-06
TRINITY_DN4337_c0_g1	OVC	OV	216.815	0	144.544	23.4439	4.20638	5.57342	2.50×10^-08	1.42×10^-06
TRINITY_DN110850_c0_g1	OVC	OV	0	215.648	71.8828	-9.93304	1.78235	-5.57299	2.50×10^-08	1.42×10^-06
TRINITY_DN17435_c0_g1	OVC	OV	215.117	0	143.411	23.439	4.20638	5.57224	2.51×10^-08	1.43×10^-06
TRINITY_DN130868_c0_g1	OVC	OV	0	411.364	137.121	-10.8647	1.95005	-5.57152	2.53×10^-08	1.43×10^-06
TRINITY_DN4667_c2_g1	OVC	OV	215.395	0	143.597	23.4348	4.20638	5.57125	2.53×10^-08	1.43×10^-06
TRINITY_DN14773_c1_g1	OVC	OV	214.524	0	143.016	23.4347	4.20638	5.57122	2.53×10^-08	1.43×10^-06
TRINITY_DN43337_c0_g1	OVC	OV	0	188.711	62.9038	-9.74053	1.74838	-5.57116	2.53×10^-08	1.43×10^-06
TRINITY_DN242_c4_g1	OVC	OV	299.492	0	199.662	23.4327	4.20628	5.57088	2.53×10^-08	1.43×10^-06
TRINITY_DN29970_c0_g2	OVC	OV	213.209	0	142.139	23.4243	4.20638	5.56874	2.57×10^-08	1.45×10^-06
TRINITY_DN2188_c3_g1	OVC	OV	213.337	0	142.225	23.421	4.20638	5.56797	2.58×10^-08	1.45×10^-06
TRINITY_DN1237_c3_g1	OVC	OV	205.346	0	136.898	10.7032	1.92234	5.56781	2.58×10^-08	1.45×10^-06
TRINITY_DN4132_c0_g6	OVC	OV	94.983	0	63.322	9.59255	1.72286	5.5678	2.58×10^-08	1.45×10^-06
TRINITY_DN40300_c4_g1	OVC	OV	213.247	0	142.164	23.4201	4.20638	5.56775	2.58×10^-08	1.45×10^-06
TRINITY_DN561_c0_g1	OVC	OV	6526.25	1780.63	4944.38	1.87392	0.336657	5.56628	2.60×10^-08	1.46×10^-06
TRINITY_DN9247_c0_g1	OVC	OV	57.0232	4.99919	39.6819	3.51201	0.631026	5.56555	2.61×10^-08	1.47×10^-06
TRINITY_DN1454_c8_g1	OVC	OV	0	479.321	159.774	-11.0853	1.99203	-5.56485	2.62×10^-08	1.47×10^-06
TRINITY_DN22386_c5_g1	OVC	OV	210.273	0	140.182	23.4072	4.20639	5.56468	2.63×10^-08	1.47×10^-06
TRINITY_DN107770_c0_g4	OVC	OV	211.085	0	140.723	23.4067	4.20639	5.56455	2.63×10^-08	1.47×10^-06
TRINITY_DN18232_c0_g1	OVC	OV	210.088	0	140.059	23.406	4.20639	5.56439	2.63×10^-08	1.47×10^-06
TRINITY_DN8789_c7_g1	OVC	OV	209.531	0	139.687	23.4018	4.20639	5.56339	2.65×10^-08	1.48×10^-06
TRINITY_DN2850_c3_g1	OVC	OV	209.033	0	139.355	23.399	4.20639	5.56272	2.66×10^-08	1.48×10^-06
TRINITY_DN186_c3_g1	OVC	OV	177.647	2811.53	1055.61	-3.98479	0.716341	-5.5627	2.66×10^-08	1.48×10^-06
TRINITY_DN4172_c3_g1	OVC	OV	96.5334	0	64.3556	9.61588	1.72865	5.56266	2.66×10^-08	1.48×10^-06
TRINITY_DN1083_c2_g1	OVC	OV	1258.37	264.708	927.148	2.249	0.40439	5.56145	2.68×10^-08	1.49×10^-06
TRINITY_DN2218_c1_g1	OVC	OV	1169.36	4.06385	780.927	8.17055	1.46954	5.55995	2.70×10^-08	1.51×10^-06
TRINITY_DN8049_c5_g1	OVC	OV	207.596	0	138.397	23.3846	4.20639	5.5593	2.71×10^-08	1.51×10^-06
TRINITY_DN6245_c1_g1	OVC	OV	206.174	0	137.45	23.3796	4.2064	5.55811	2.73×10^-08	1.52×10^-06
TRINITY_DN4146_c3_g1	OVC	OV	45.0485	0	30.0323	8.50635	1.53066	5.55731	2.74×10^-08	1.52×10^-06
TRINITY_DN141_c0_g2	OVC	OV	205.206	0	136.804	23.3709	4.2064	5.55604	2.76×10^-08	1.53×10^-06
TRINITY_DN4953_c9_g1	OVC	OV	204.518	0	136.345	23.3686	4.2064	5.55549	2.77×10^-08	1.54×10^-06
TRINITY_DN35933_c2_g2	OVC	OV	328.822	0	219.214	23.3669	4.20626	5.55527	2.77×10^-08	1.54×10^-06
TRINITY_DN12563_c0_g2	OVC	OV	0	240.099	80.0329	-10.088	1.81594	-5.55523	2.77×10^-08	1.54×10^-06
TRINITY_DN768_c0_g2	OVC	OV	10589.8	895.076	7358.24	3.56456	0.641764	5.55431	2.79×10^-08	1.54×10^-06
TRINITY_DN36102_c0_g1	OVC	OV	23.2827	100.614	49.0598	-2.1099	0.37987	-5.55427	2.79×10^-08	1.54×10^-06
TRINITY_DN11899_c0_g1	OVC	OV	203.254	0	135.502	23.3597	4.2064	5.55337	2.80×10^-08	1.55×10^-06
TRINITY_DN12678_c0_g2	OVC	OV	201.92	0	134.613	23.3508	4.2064	5.55126	2.84×10^-08	1.57×10^-06
TRINITY_DN37937_c4_g1	OVC	OV	201.97	0	134.647	23.3493	4.2064	5.55089	2.84×10^-08	1.57×10^-06
TRINITY_DN42480_c0_g1	OVC	OV	415.204	0	276.803	23.3482	4.20621	5.55088	2.84×10^-08	1.57×10^-06
TRINITY_DN6586_c2_g2	OVC	OV	18.6131	74.6697	37.2987	-2.0025	0.360763	-5.55073	2.84×10^-08	1.57×10^-06
TRINITY_DN19541_c0_g1	OVC	OV	14.7237	102.573	44.0068	-2.81912	0.50804	-5.54901	2.87×10^-08	1.58×10^-06
TRINITY_DN14677_c1_g1	OVC	OV	0	207.329	69.1095	-9.87628	1.77992	-5.54871	2.88×10^-08	1.59×10^-06
TRINITY_DN81822_c0_g1	OVC	OV	0	280.303	93.4345	-10.3113	1.85865	-5.54774	2.89×10^-08	1.59×10^-06
TRINITY_DN4291_c2_g2	OVC	OV	199.716	0	133.144	23.3355	4.20641	5.54761	2.90×10^-08	1.59×10^-06
TRINITY_DN2143_c2_g1	OVC	OV	522.386	224.23	423.001	1.22042	0.219992	5.54757	2.90×10^-08	1.59×10^-06
TRINITY_DN7357_c1_g3	OVC	OV	208.958	0	139.305	23.3341	4.20639	5.54729	2.90×10^-08	1.59×10^-06
TRINITY_DN13578_c0_g5	OVC	OV	0	156.083	52.0277	-9.46667	1.7066	-5.54709	2.90×10^-08	1.59×10^-06
TRINITY_DN36158_c0_g2	OVC	OV	1.86378	66.2327	23.3201	-5.20084	0.937615	-5.54688	2.91×10^-08	1.60×10^-06
TRINITY_DN2396_c9_g1	OVC	OV	199.222	0	132.815	23.3301	4.20641	5.54633	2.92×10^-08	1.60×10^-06
TRINITY_DN1240_c1_g3	OVC	OV	199.425	0	132.95	23.3288	4.20641	5.546	2.92×10^-08	1.60×10^-06
TRINITY_DN5774_c3_g1	OVC	OV	0.48502	143.568	48.1792	-7.955	1.43463	-5.545	2.94×10^-08	1.61×10^-06
TRINITY_DN540_c5_g1	OVC	OV	0	200.248	66.7492	-9.82613	1.77237	-5.54405	2.96×10^-08	1.62×10^-06
TRINITY_DN5737_c3_g2	OVC	OV	193.197	0	128.798	10.6134	1.91451	5.54366	2.96×10^-08	1.62×10^-06
TRINITY_DN131442_c0_g1	OVC	OV	395.271	0	263.514	23.3157	4.20622	5.54315	2.97×10^-08	1.62×10^-06
TRINITY_DN15424_c0_g2	OVC	OV	34.0039	154.795	74.2675	-2.17724	0.392793	-5.54299	2.97×10^-08	1.62×10^-06
TRINITY_DN5090_c3_g1	OVC	OV	197.315	0	131.543	23.3158	4.20641	5.54291	2.97×10^-08	1.62×10^-06
TRINITY_DN7115_c9_g1	OVC	OV	196.865	0	131.243	23.3152	4.20641	5.54278	2.98×10^-08	1.62×10^-06
TRINITY_DN33089_c2_g2	OVC	OV	197.442	0	131.628	23.3125	4.20641	5.54213	2.99×10^-08	1.63×10^-06
TRINITY_DN113503_c0_g1	OVC	OV	196.289	0	130.859	23.3113	4.20641	5.54186	2.99×10^-08	1.63×10^-06
TRINITY_DN12758_c0_g3	OVC	OV	196.323	0	130.882	23.3109	4.20641	5.54175	2.99×10^-08	1.63×10^-06
TRINITY_DN15902_c0_g2	OVC	OV	90.3901	3.36456	61.3816	4.75354	0.857862	5.54114	3.01×10^-08	1.63×10^-06
TRINITY_DN46232_c0_g4	OVC	OV	378.985	0	252.656	23.3073	4.20623	5.54113	3.01×10^-08	1.63×10^-06
TRINITY_DN634_c2_g3	OVC	OV	79.3766	226.644	128.466	-1.51383	0.273269	-5.53972	3.03×10^-08	1.64×10^-06
TRINITY_DN7079_c2_g1	OVC	OV	281.734	0	187.822	11.1593	2.01445	5.5396	3.03×10^-08	1.64×10^-06
TRINITY_DN16578_c3_g1	OVC	OV	0	155.788	51.9295	-9.46395	1.70864	-5.53888	3.04×10^-08	1.65×10^-06
TRINITY_DN47239_c2_g1	OVC	OV	194.575	0	129.716	23.298	4.20642	5.53868	3.05×10^-08	1.65×10^-06
TRINITY_DN8143_c3_g1	OVC	OV	8.55217	67.6679	28.2574	-2.98305	0.538609	-5.53843	3.05×10^-08	1.65×10^-06
TRINITY_DN18703_c0_g1	OVC	OV	194.532	0	129.688	23.2965	4.20642	5.53833	3.05×10^-08	1.65×10^-06
TRINITY_DN21011_c0_g2	OVC	OV	63.7299	0	42.4866	9.01504	1.62794	5.53772	3.06×10^-08	1.65×10^-06
TRINITY_DN1830_c1_g1	OVC	OV	194.032	0	129.355	23.2929	4.20642	5.53747	3.07×10^-08	1.66×10^-06
TRINITY_DN12897_c4_g1	OVC	OV	192.38	0	128.253	23.2823	4.20642	5.53493	3.11×10^-08	1.68×10^-06
TRINITY_DN8952_c0_g2	OVC	OV	8.89982	64.3766	27.3921	-2.85718	0.51631	-5.53385	3.13×10^-08	1.69×10^-06
TRINITY_DN22547_c5_g1	OVC	OV	194.445	0	129.63	23.273	4.20642	5.53274	3.15×10^-08	1.70×10^-06
TRINITY_DN49693_c0_g1	OVC	OV	191.705	0	127.803	23.2726	4.20642	5.53264	3.15×10^-08	1.70×10^-06
TRINITY_DN1124_c3_g1	OVC	OV	190.783	0	127.189	23.2714	4.20643	5.53234	3.16×10^-08	1.70×10^-06
TRINITY_DN5166_c1_g2	OVC	OV	190.762	0	127.175	23.271	4.20643	5.53226	3.16×10^-08	1.70×10^-06
TRINITY_DN1066_c10_g1	OVC	OV	191.094	0	127.396	23.2673	4.20642	5.53136	3.18×10^-08	1.71×10^-06
TRINITY_DN22409_c2_g1	OVC	OV	190.113	0	126.742	23.2661	4.20643	5.53109	3.18×10^-08	1.71×10^-06
TRINITY_DN56_c2_g2	OVC	OV	6176.94	2083.97	4812.62	1.56766	0.283428	5.53107	3.18×10^-08	1.71×10^-06
TRINITY_DN73836_c1_g1	OVC	OV	238.906	0	159.271	23.2647	4.20635	5.53085	3.19×10^-08	1.71×10^-06
TRINITY_DN22857_c0_g1	OVC	OV	189.937	0	126.625	23.2636	4.20643	5.53049	3.19×10^-08	1.71×10^-06
TRINITY_DN47481_c0_g2	OVC	OV	189.436	0	126.29	23.2615	4.20643	5.52999	3.20×10^-08	1.71×10^-06
TRINITY_DN5729_c0_g2	OVC	OV	84.9872	0	56.6581	9.43208	1.70604	5.52865	3.23×10^-08	1.72×10^-06
TRINITY_DN6302_c0_g1	OVC	OV	149.323	33.2043	110.617	2.16721	0.392005	5.52854	3.23×10^-08	1.72×10^-06
TRINITY_DN67949_c0_g1	OVC	OV	188.101	0	125.401	23.2511	4.20643	5.52752	3.25×10^-08	1.73×10^-06
TRINITY_DN61734_c3_g1	OVC	OV	187.797	0	125.198	23.2454	4.20643	5.52617	3.27×10^-08	1.74×10^-06
TRINITY_DN4177_c16_g1	OVC	OV	187.108	0	124.738	23.2437	4.20643	5.52576	3.28×10^-08	1.75×10^-06
TRINITY_DN16576_c0_g3	OVC	OV	187.147	0	124.764	23.2426	4.20643	5.52548	3.29×10^-08	1.75×10^-06
TRINITY_DN43952_c0_g1	OVC	OV	2674.14	860.654	2069.64	1.63533	0.29597	5.52532	3.29×10^-08	1.75×10^-06
TRINITY_DN3640_c0_g5	OVC	OV	186.545	0	124.363	23.2405	4.20643	5.52499	3.30×10^-08	1.75×10^-06
TRINITY_DN29194_c0_g1	OVC	OV	230.596	0	153.731	23.2377	4.20636	5.52442	3.31×10^-08	1.76×10^-06
TRINITY_DN23214_c0_g1	OVC	OV	187.004	0	124.669	23.2369	4.20643	5.52414	3.31×10^-08	1.76×10^-06
TRINITY_DN38368_c3_g1	OVC	OV	186.019	0	124.013	23.236	4.20644	5.52392	3.32×10^-08	1.76×10^-06
TRINITY_DN80800_c0_g1	OVC	OV	541.433	60.2835	381.05	3.16759	0.573564	5.52263	3.34×10^-08	1.77×10^-06
TRINITY_DN75893_c0_g3	OVC	OV	185.42	0	123.613	23.2298	4.20644	5.52245	3.34×10^-08	1.77×10^-06
TRINITY_DN116011_c0_g1	OVC	OV	99747.2	104.14	66532.8	9.90361	1.79371	5.52128	3.37×10^-08	1.78×10^-06
TRINITY_DN12758_c0_g1	OVC	OV	184.578	0	123.052	23.2228	4.20644	5.52078	3.37×10^-08	1.78×10^-06
TRINITY_DN99481_c0_g1	OVC	OV	184.191	0	122.794	23.2221	4.20644	5.52061	3.38×10^-08	1.78×10^-06
TRINITY_DN16110_c0_g1	OVC	OV	183.918	0	122.612	23.2199	4.20644	5.52009	3.39×10^-08	1.79×10^-06
TRINITY_DN1639_c3_g1	OVC	OV	445.389	199.132	363.303	1.16169	0.21045	5.52004	3.39×10^-08	1.79×10^-06
TRINITY_DN2453_c14_g1	OVC	OV	184.102	0	122.735	23.2197	4.20644	5.52004	3.39×10^-08	1.79×10^-06
TRINITY_DN47229_c5_g1	OVC	OV	40.7913	189.538	90.3736	-2.20521	0.39954	-5.51938	3.40×10^-08	1.79×10^-06
TRINITY_DN80616_c0_g2	OVC	OV	183.423	0	122.282	23.2169	4.20644	5.51936	3.40×10^-08	1.79×10^-06
TRINITY_DN5398_c10_g1	OVC	OV	183.183	0	122.122	23.2113	4.20644	5.51804	3.43×10^-08	1.80×10^-06
TRINITY_DN20341_c0_g1	OVC	OV	182.499	0	121.666	23.2099	4.20644	5.51769	3.43×10^-08	1.81×10^-06
TRINITY_DN8694_c0_g1	OVC	OV	11551.6	4020	9041.09	1.52276	0.276003	5.51719	3.44×10^-08	1.81×10^-06
TRINITY_DN16328_c1_g1	OVC	OV	181.889	0	121.259	23.2044	4.20644	5.5164	3.46×10^-08	1.82×10^-06
TRINITY_DN24024_c0_g1	OVC	OV	99.9248	0	66.6165	9.66324	1.75185	5.51602	3.47×10^-08	1.82×10^-06
TRINITY_DN15573_c6_g1	OVC	OV	364.531	0	243.021	23.2013	4.20624	5.51592	3.47×10^-08	1.82×10^-06
TRINITY_DN4684_c1_g3	OVC	OV	2436.08	2.67259	1624.94	9.83168	1.78254	5.51554	3.48×10^-08	1.82×10^-06
TRINITY_DN14770_c0_g6	OVC	OV	181.189	0	120.793	23.1982	4.20645	5.51491	3.49×10^-08	1.83×10^-06
TRINITY_DN78_c6_g1	OVC	OV	137.438	0.338655	91.7384	8.67998	1.57402	5.51454	3.50×10^-08	1.83×10^-06
TRINITY_DN3968_c7_g1	OVC	OV	179.496	0	119.664	23.1866	4.20645	5.51214	3.54×10^-08	1.85×10^-06
TRINITY_DN15144_c0_g1	OVC	OV	544.409	147.145	411.987	1.88641	0.342234	5.51206	3.55×10^-08	1.85×10^-06
TRINITY_DN86489_c0_g1	OVC	OV	899.342	161.518	653.401	2.47756	0.449512	5.51166	3.55×10^-08	1.85×10^-06
TRINITY_DN9141_c2_g2	OVC	OV	183.882	0	122.588	23.1841	4.20644	5.51157	3.56×10^-08	1.85×10^-06
TRINITY_DN94656_c0_g1	OVC	OV	189.064	0	126.042	23.1829	4.20643	5.51131	3.56×10^-08	1.86×10^-06
TRINITY_DN68969_c0_g1	OVC	OV	182.356	0	121.571	23.1745	4.20644	5.50929	3.60×10^-08	1.88×10^-06
TRINITY_DN6930_c6_g1	OVC	OV	178.072	0	118.715	23.1712	4.20645	5.50849	3.62×10^-08	1.88×10^-06
TRINITY_DN15614_c2_g1	OVC	OV	180.039	0	120.026	23.1707	4.20645	5.50837	3.62×10^-08	1.88×10^-06
TRINITY_DN3953_c5_g1	OVC	OV	177.491	0	118.327	23.1705	4.20645	5.50832	3.62×10^-08	1.88×10^-06
TRINITY_DN58953_c0_g1	OVC	OV	41.456	0	27.6373	8.39138	1.52344	5.50818	3.63×10^-08	1.88×10^-06
TRINITY_DN83412_c0_g1	OVC	OV	4.53546	121.905	43.6588	-4.80493	0.872327	-5.50817	3.63×10^-08	1.88×10^-06
TRINITY_DN57380_c1_g2	OVC	OV	3115.4	273.843	2168.21	3.50816	0.637001	5.5073	3.64×10^-08	1.89×10^-06
TRINITY_DN2664_c0_g2	OVC	OV	176.812	0	117.874	23.1648	4.20646	5.50696	3.65×10^-08	1.89×10^-06
TRINITY_DN5282_c1_g1	OVC	OV	119.63	31.8277	90.3626	1.90619	0.34616	5.50668	3.66×10^-08	1.89×10^-06
TRINITY_DN7029_c13_g1	OVC	OV	186.667	0	124.445	23.1606	4.20643	5.50599	3.67×10^-08	1.90×10^-06
TRINITY_DN1316_c2_g1	OVC	OV	497.606	207.635	400.949	1.26236	0.229277	5.50583	3.67×10^-08	1.90×10^-06
TRINITY_DN30707_c0_g3	OVC	OV	180.5	0	120.333	23.1571	4.20645	5.50514	3.69×10^-08	1.91×10^-06
TRINITY_DN1382_c2_g1	OVC	OV	351.515	0.331325	234.454	10.0364	1.8232	5.50485	3.69×10^-08	1.91×10^-06
TRINITY_DN10888_c3_g1	OVC	OV	0	202.985	67.6616	-9.84574	1.78859	-5.50475	3.70×10^-08	1.91×10^-06
TRINITY_DN39632_c0_g1	OVC	OV	52.4476	2.00994	35.635	4.69744	0.853371	5.50456	3.70×10^-08	1.91×10^-06
TRINITY_DN105751_c0_g1	OVC	OV	175.008	0	116.672	23.151	4.20646	5.50369	3.72×10^-08	1.92×10^-06
TRINITY_DN75599_c1_g1	OVC	OV	91.4346	0	60.9564	9.53393	1.7323	5.50362	3.72×10^-08	1.92×10^-06
TRINITY_DN12658_c0_g1	OVC	OV	175.375	0	116.917	23.1498	4.20646	5.5034	3.73×10^-08	1.92×10^-06
TRINITY_DN6878_c5_g1	OVC	OV	174.868	0	116.579	23.1488	4.20646	5.50314	3.73×10^-08	1.92×10^-06
TRINITY_DN44495_c3_g1	OVC	OV	174.948	0	116.632	23.1483	4.20646	5.50303	3.73×10^-08	1.92×10^-06
TRINITY_DN10561_c0_g2	OVC	OV	174.436	0	116.291	23.1456	4.20646	5.5024	3.75×10^-08	1.92×10^-06
TRINITY_DN474_c1_g2	OVC	OV	990.05	369.689	783.263	1.42036	0.258163	5.50179	3.76×10^-08	1.93×10^-06
TRINITY_DN6008_c0_g2	OVC	OV	366.157	179.172	303.829	1.02925	0.18711	5.50079	3.78×10^-08	1.94×10^-06
TRINITY_DN34515_c1_g4	OVC	OV	173.201	0	115.468	23.1355	4.20647	5.49999	3.80×10^-08	1.94×10^-06
TRINITY_DN14139_c5_g1	OVC	OV	173.126	0	115.417	23.1354	4.20647	5.49995	3.80×10^-08	1.94×10^-06
TRINITY_DN8825_c6_g1	OVC	OV	173.535	0	115.69	23.1349	4.20646	5.49984	3.80×10^-08	1.94×10^-06
TRINITY_DN1814_c4_g1	OVC	OV	182.927	0	121.951	23.1345	4.20644	5.49978	3.80×10^-08	1.94×10^-06
TRINITY_DN434_c10_g1	OVC	OV	0	231.691	77.2304	-10.0365	1.82499	-5.49949	3.81×10^-08	1.95×10^-06
TRINITY_DN113485_c4_g1	OVC	OV	233.64	0	155.76	23.1299	4.20635	5.49881	3.82×10^-08	1.95×10^-06
TRINITY_DN9526_c0_g1	OVC	OV	0.306168	79.2936	26.6353	-7.76833	1.41285	-5.49836	3.83×10^-08	1.95×10^-06
TRINITY_DN51510_c4_g1	OVC	OV	172.123	0	114.749	23.1278	4.20647	5.49815	3.84×10^-08	1.96×10^-06
TRINITY_DN49371_c4_g1	OVC	OV	0	268.855	89.6184	-10.2512	1.86462	-5.49772	3.85×10^-08	1.96×10^-06
TRINITY_DN47226_c2_g1	OVC	OV	172.664	0	115.109	23.126	4.20647	5.49772	3.85×10^-08	1.96×10^-06
TRINITY_DN6881_c2_g1	OVC	OV	171.747	0	114.498	23.1223	4.20647	5.49685	3.87×10^-08	1.97×10^-06
TRINITY_DN7202_c3_g1	OVC	OV	103.933	273.278	160.382	-1.39234	0.253323	-5.49631	3.88×10^-08	1.97×10^-06
TRINITY_DN19668_c0_g1	OVC	OV	171.077	0	114.051	23.1199	4.20647	5.49626	3.88×10^-08	1.97×10^-06
TRINITY_DN11268_c4_g1	OVC	OV	171.072	0	114.048	23.1193	4.20647	5.49614	3.88×10^-08	1.97×10^-06
TRINITY_DN52843_c2_g1	OVC	OV	268.572	0	179.048	23.1183	4.20631	5.49611	3.88×10^-08	1.97×10^-06
TRINITY_DN2381_c1_g1	OVC	OV	1.86378	71.5192	25.0822	-5.31012	0.966166	-5.49608	3.88×10^-08	1.97×10^-06
TRINITY_DN27376_c0_g3	OVC	OV	181.326	0	120.884	23.117	4.20645	5.49562	3.89×10^-08	1.97×10^-06
TRINITY_DN3393_c14_g1	OVC	OV	341.875	0	227.917	23.1144	4.20625	5.49526	3.90×10^-08	1.97×10^-06
TRINITY_DN2450_c2_g1	OVC	OV	170.276	0	113.517	23.1128	4.20647	5.49459	3.92×10^-08	1.98×10^-06
TRINITY_DN22451_c2_g4	OVC	OV	196.659	0	131.106	23.1117	4.20641	5.4944	3.92×10^-08	1.98×10^-06
TRINITY_DN7315_c1_g1	OVC	OV	49.6576	240.745	113.354	-2.26711	0.412761	-5.49255	3.96×10^-08	2.00×10^-06
TRINITY_DN17504_c1_g1	OVC	OV	169.378	0	112.919	23.1008	4.20648	5.49172	3.98×10^-08	2.01×10^-06
TRINITY_DN596_c7_g1	OVC	OV	169.378	0	112.919	23.1008	4.20648	5.49172	3.98×10^-08	2.01×10^-06
TRINITY_DN119733_c0_g1	OVC	OV	169.247	0	112.831	23.0997	4.20648	5.49147	3.99×10^-08	2.01×10^-06
TRINITY_DN15524_c1_g1	OVC	OV	136.919	0	91.2791	10.1167	1.84298	5.48929	4.04×10^-08	2.03×10^-06
TRINITY_DN9477_c1_g1	OVC	OV	174.065	0	116.043	23.0882	4.20646	5.48875	4.05×10^-08	2.04×10^-06
TRINITY_DN2559_c2_g1	OVC	OV	353.089	48.7018	251.627	2.85898	0.520888	5.48868	4.05×10^-08	2.04×10^-06
TRINITY_DN14506_c2_g1	OVC	OV	41.2021	0	27.468	8.3856	1.52789	5.48837	4.06×10^-08	2.04×10^-06
TRINITY_DN2017_c14_g1	OVC	OV	243.333	0	162.222	23.0842	4.20634	5.48796	4.07×10^-08	2.04×10^-06
TRINITY_DN4331_c0_g1	OVC	OV	606.968	295.417	503.118	1.03687	0.188967	5.48704	4.09×10^-08	2.05×10^-06
TRINITY_DN23_c4_g1	OVC	OV	166.273	0	110.849	23.0789	4.20648	5.48652	4.10×10^-08	2.05×10^-06
TRINITY_DN411_c4_g1	OVC	OV	4.461	51.8977	20.2732	-3.54536	0.646577	-5.48328	4.18×10^-08	2.09×10^-06
TRINITY_DN64326_c0_g2	OVC	OV	171.479	0	114.319	23.0623	4.20647	5.48259	4.19×10^-08	2.10×10^-06
TRINITY_DN1451_c0_g1	OVC	OV	3756.64	1622.88	3045.39	1.2111	0.2209	5.48256	4.19×10^-08	2.10×10^-06
TRINITY_DN826_c3_g1	OVC	OV	163.902	0	109.268	23.0597	4.20649	5.48193	4.21×10^-08	2.10×10^-06
TRINITY_DN679_c1_g1	OVC	OV	94.5895	314.601	167.927	-1.7393	0.317357	-5.48057	4.24×10^-08	2.12×10^-06
TRINITY_DN26528_c1_g1	OVC	OV	163.012	0	108.675	23.052	4.20649	5.48011	4.25×10^-08	2.12×10^-06
TRINITY_DN84949_c0_g1	OVC	OV	0	152.468	50.8226	-9.43286	1.72148	-5.47952	4.26×10^-08	2.13×10^-06
TRINITY_DN1432_c1_g1	OVC	OV	162.961	0	108.641	23.0495	4.20649	5.47949	4.27×10^-08	2.13×10^-06
TRINITY_DN43989_c1_g1	OVC	OV	162.604	0	108.403	23.0424	4.20649	5.47781	4.31×10^-08	2.14×10^-06
TRINITY_DN1132_c0_g1	OVC	OV	959.373	449.783	789.51	1.09216	0.199413	5.47685	4.33×10^-08	2.15×10^-06
TRINITY_DN4736_c3_g2	OVC	OV	0	215.921	71.9737	-9.93487	1.81406	-5.4766	4.34×10^-08	2.16×10^-06
TRINITY_DN16582_c0_g1	OVC	OV	219.994	0	146.663	23.0363	4.20637	5.47653	4.34×10^-08	2.16×10^-06
TRINITY_DN13143_c2_g1	OVC	OV	161.468	0	107.645	23.0325	4.2065	5.47547	4.36×10^-08	2.17×10^-06
TRINITY_DN41525_c0_g1	OVC	OV	160.4	0	106.933	23.0298	4.2065	5.47481	4.38×10^-08	2.17×10^-06
TRINITY_DN39606_c0_g2	OVC	OV	160.257	0	106.838	23.028	4.2065	5.47438	4.39×10^-08	2.18×10^-06
TRINITY_DN77199_c0_g1	OVC	OV	171.033	0	114.022	23.0278	4.20647	5.47437	4.39×10^-08	2.18×10^-06
TRINITY_DN111026_c6_g1	OVC	OV	160.354	0	106.903	23.0264	4.2065	5.47401	4.40×10^-08	2.18×10^-06
TRINITY_DN15078_c1_g1	OVC	OV	160.097	0	106.731	23.0244	4.2065	5.47353	4.41×10^-08	2.18×10^-06
TRINITY_DN42128_c0_g1	OVC	OV	160.02	0	106.68	23.0238	4.2065	5.47339	4.42×10^-08	2.18×10^-06
TRINITY_DN37732_c3_g1	OVC	OV	159.645	0	106.43	23.0225	4.2065	5.47308	4.42×10^-08	2.19×10^-06
TRINITY_DN13486_c0_g1	OVC	OV	185.978	0	123.986	23.0124	4.20644	5.47075	4.48×10^-08	2.21×10^-06
TRINITY_DN3849_c5_g2	OVC	OV	223.717	0	149.145	10.8264	1.97939	5.46957	4.51×10^-08	2.23×10^-06
TRINITY_DN25190_c0_g1	OVC	OV	0	231.713	77.2377	-10.0367	1.83508	-5.46933	4.52×10^-08	2.23×10^-06
TRINITY_DN79944_c0_g1	OVC	OV	160.138	0	106.759	23.0064	4.2065	5.46926	4.52×10^-08	2.23×10^-06
TRINITY_DN59777_c1_g1	OVC	OV	157.313	0	104.876	23.0026	4.20651	5.46833	4.54×10^-08	2.24×10^-06
TRINITY_DN6918_c5_g1	OVC	OV	157.165	0	104.776	23.0005	4.20651	5.46783	4.56×10^-08	2.24×10^-06
TRINITY_DN1593_c0_g1	OVC	OV	1258.61	504.811	1007.35	1.31717	0.240908	5.4675	4.56×10^-08	2.24×10^-06
TRINITY_DN5341_c4_g1	OVC	OV	2230.07	977.819	1812.65	1.18902	0.217489	5.46704	4.58×10^-08	2.25×10^-06
TRINITY_DN3455_c5_g1	OVC	OV	0	151.099	50.3662	-9.41985	1.72319	-5.46652	4.59×10^-08	2.25×10^-06
TRINITY_DN89178_c0_g2	OVC	OV	212.97	0	141.98	22.9931	4.20638	5.46625	4.60×10^-08	2.26×10^-06
TRINITY_DN17992_c1_g1	OVC	OV	7.74398	89.5265	35.0048	-3.48853	0.638315	-5.46522	4.62×10^-08	2.27×10^-06
TRINITY_DN11946_c0_g1	OVC	OV	155.723	0	103.815	22.9846	4.20651	5.46405	4.65×10^-08	2.28×10^-06
TRINITY_DN5349_c1_g1	OVC	OV	155.723	0	103.815	22.9846	4.20651	5.46405	4.65×10^-08	2.28×10^-06
TRINITY_DN37363_c0_g1	OVC	OV	1.41691	69.2366	24.0235	-5.57202	1.01999	-5.46284	4.69×10^-08	2.29×10^-06
TRINITY_DN19031_c0_g1	OVC	OV	53.3023	294.807	133.804	-2.4767	0.453433	-5.4621	4.71×10^-08	2.30×10^-06
TRINITY_DN2258_c7_g1	OVC	OV	154.062	0	102.708	22.9737	4.20652	5.46145	4.72×10^-08	2.31×10^-06
TRINITY_DN36230_c0_g1	OVC	OV	1.9522	231.454	78.4527	-6.84931	1.25438	-5.46031	4.75×10^-08	2.32×10^-06
TRINITY_DN4940_c1_g1	OVC	OV	420.898	6.35381	282.717	6.04974	1.108	5.46008	4.76×10^-08	2.32×10^-06
TRINITY_DN1246_c1_g1	OVC	OV	153.031	0	102.021	22.9645	4.20652	5.45926	4.78×10^-08	2.33×10^-06
TRINITY_DN2239_c0_g1	OVC	OV	388.362	4.3512	260.358	6.48013	1.18715	5.45856	4.80×10^-08	2.34×10^-06
TRINITY_DN1123_c0_g4	OVC	OV	121.133	316.732	186.332	-1.38652	0.254015	-5.45842	4.80×10^-08	2.34×10^-06
TRINITY_DN2925_c9_g1	OVC	OV	152.349	0	101.566	22.9574	4.20652	5.45758	4.83×10^-08	2.35×10^-06
TRINITY_DN73842_c0_g2	OVC	OV	152.349	0	101.566	22.9574	4.20652	5.45758	4.83×10^-08	2.35×10^-06
TRINITY_DN9046_c1_g1	OVC	OV	152.349	0	101.566	22.9574	4.20652	5.45758	4.83×10^-08	2.35×10^-06
TRINITY_DN838_c2_g1	OVC	OV	152.186	0	101.457	22.9569	4.20653	5.45745	4.83×10^-08	2.35×10^-06
TRINITY_DN4623_c2_g2	OVC	OV	62.103	14.0622	46.0894	2.14028	0.392219	5.45685	4.85×10^-08	2.35×10^-06
TRINITY_DN30387_c0_g1	OVC	OV	0	587.981	195.994	-11.3801	2.08584	-5.45589	4.87×10^-08	2.36×10^-06
TRINITY_DN1194_c17_g1	OVC	OV	151.418	0	100.945	22.9498	4.20653	5.45575	4.88×10^-08	2.36×10^-06
TRINITY_DN13851_c0_g1	OVC	OV	325.329	99.5102	250.056	1.7065	0.312794	5.45567	4.88×10^-08	2.36×10^-06
TRINITY_DN4909_c0_g1	OVC	OV	149.695	23.052	107.481	2.69779	0.494558	5.45495	4.90×10^-08	2.37×10^-06
TRINITY_DN17542_c0_g2	OVC	OV	150.738	0	100.492	22.9384	4.20653	5.45304	4.95×10^-08	2.40×10^-06
TRINITY_DN39852_c0_g2	OVC	OV	150.634	0	100.423	22.9354	4.20653	5.45233	4.97×10^-08	2.40×10^-06
TRINITY_DN51010_c6_g1	OVC	OV	149.912	0	99.9414	22.9347	4.20653	5.45216	4.98×10^-08	2.40×10^-06
TRINITY_DN3454_c9_g1	OVC	OV	149.541	0	99.6943	22.9325	4.20653	5.45163	4.99×10^-08	2.41×10^-06
TRINITY_DN14332_c6_g1	OVC	OV	149.672	0	99.7815	22.9315	4.20653	5.4514	5.00×10^-08	2.41×10^-06
TRINITY_DN21036_c2_g2	OVC	OV	149.428	0	99.619	22.9257	4.20653	5.45002	5.04×10^-08	2.43×10^-06
TRINITY_DN8091_c0_g3	OVC	OV	148.924	0	99.283	22.9247	4.20654	5.44979	5.04×10^-08	2.43×10^-06
TRINITY_DN61_c108_g2	OVC	OV	148.632	0	99.0879	22.9226	4.20654	5.44927	5.06×10^-08	2.43×10^-06
TRINITY_DN84900_c1_g1	OVC	OV	148.632	0	99.0879	22.9226	4.20654	5.44927	5.06×10^-08	2.43×10^-06
TRINITY_DN47446_c0_g1	OVC	OV	0	573.417	191.139	-11.3439	2.08194	-5.44872	5.07×10^-08	2.44×10^-06
TRINITY_DN54418_c10_g1	OVC	OV	148.172	0	98.7815	22.9184	4.20654	5.44829	5.09×10^-08	2.44×10^-06
TRINITY_DN29317_c0_g1	OVC	OV	148.24	0	98.8263	22.9149	4.20654	5.44745	5.11×10^-08	2.45×10^-06
TRINITY_DN4800_c0_g4	OVC	OV	35.0048	280.743	116.918	-2.99478	0.549767	-5.44737	5.11×10^-08	2.45×10^-06
TRINITY_DN55652_c0_g1	OVC	OV	767.985	354.869	630.279	1.11255	0.20425	5.44698	5.12×10^-08	2.46×10^-06
TRINITY_DN11938_c2_g1	OVC	OV	88.6134	0	59.0756	9.48939	1.74226	5.44661	5.13×10^-08	2.46×10^-06
TRINITY_DN15436_c0_g1	OVC	OV	148.406	0	98.9372	22.91	4.20654	5.4463	5.14×10^-08	2.46×10^-06
TRINITY_DN509_c4_g1	OVC	OV	11.5761	90.4252	37.8591	-2.98602	0.548298	-5.44599	5.15×10^-08	2.47×10^-06
TRINITY_DN1454_c0_g3	OVC	OV	51.4384	0	34.2923	8.70095	1.59813	5.44447	5.20×10^-08	2.49×10^-06
TRINITY_DN8168_c0_g1	OVC	OV	1916.49	852.916	1561.97	1.16738	0.214428	5.44416	5.21×10^-08	2.49×10^-06
TRINITY_DN105846_c0_g1	OVC	OV	202.077	0	134.718	22.9003	4.2064	5.44415	5.21×10^-08	2.49×10^-06
TRINITY_DN41858_c0_g1	OVC	OV	146.07	0	97.38	22.898	4.20655	5.44343	5.23×10^-08	2.49×10^-06
TRINITY_DN50195_c6_g1	OVC	OV	146.07	0	97.38	22.898	4.20655	5.44343	5.23×10^-08	2.49×10^-06
TRINITY_DN27759_c6_g1	OVC	OV	144.674	0	96.4496	22.8821	4.20655	5.43964	5.34×10^-08	2.55×10^-06
TRINITY_DN3900_c0_g2	OVC	OV	280.129	11.743	190.667	4.57763	0.841624	5.43904	5.36×10^-08	2.55×10^-06
TRINITY_DN41388_c0_g4	OVC	OV	0	153.912	51.304	-9.44647	1.73692	-5.43863	5.37×10^-08	2.56×10^-06
TRINITY_DN45507_c0_g5	OVC	OV	146.308	0	97.5387	22.8726	4.20655	5.43739	5.41×10^-08	2.57×10^-06
TRINITY_DN4051_c1_g3	OVC	OV	143.593	0	95.7288	22.8723	4.20655	5.43729	5.41×10^-08	2.57×10^-06
TRINITY_DN92720_c0_g1	OVC	OV	39.195	0	26.13	8.31321	1.52912	5.43659	5.43×10^-08	2.58×10^-06
TRINITY_DN12269_c9_g1	OVC	OV	170.68	0	113.787	22.866	4.20647	5.43592	5.45×10^-08	2.59×10^-06
TRINITY_DN26987_c4_g1	OVC	OV	143.698	0	95.7989	22.8659	4.20655	5.43579	5.46×10^-08	2.59×10^-06
TRINITY_DN18065_c0_g4	OVC	OV	197.026	0	131.35	22.8622	4.20641	5.43508	5.48×10^-08	2.60×10^-06
TRINITY_DN60883_c0_g1	OVC	OV	142.754	0	95.169	22.8614	4.20656	5.4347	5.49×10^-08	2.60×10^-06
TRINITY_DN3761_c16_g1	OVC	OV	243.808	0	162.539	22.8565	4.20634	5.43383	5.52×10^-08	2.61×10^-06
TRINITY_DN62865_c2_g1	OVC	OV	0	149.449	49.8164	-9.40401	1.73072	-5.43357	5.52×10^-08	2.61×10^-06
TRINITY_DN5857_c3_g1	OVC	OV	142.076	0	94.7176	22.8551	4.20656	5.4332	5.54×10^-08	2.62×10^-06
TRINITY_DN48601_c2_g1	OVC	OV	68.4367	0	45.6245	9.11708	1.67814	5.43284	5.55×10^-08	2.62×10^-06
TRINITY_DN45969_c5_g1	OVC	OV	140.869	0	93.9129	22.8489	4.20657	5.43173	5.58×10^-08	2.64×10^-06
TRINITY_DN1988_c9_g1	OVC	OV	140.844	0	93.8957	22.8476	4.20657	5.43142	5.59×10^-08	2.64×10^-06
TRINITY_DN42889_c1_g4	OVC	OV	140.844	0	93.8957	22.8476	4.20657	5.43142	5.59×10^-08	2.64×10^-06
TRINITY_DN8728_c0_g1	OVC	OV	97.9536	0.338655	65.4153	8.19333	1.50872	5.43065	5.61×10^-08	2.65×10^-06
TRINITY_DN14196_c0_g1	OVC	OV	12.8041	90.1159	38.5747	-2.84817	0.524472	-5.43054	5.62×10^-08	2.65×10^-06
TRINITY_DN90724_c5_g1	OVC	OV	140.203	0	93.4684	22.842	4.20657	5.43009	5.63×10^-08	2.65×10^-06
TRINITY_DN5765_c0_g1	OVC	OV	0	149.973	49.9909	-9.40906	1.73292	-5.42961	5.65×10^-08	2.66×10^-06
TRINITY_DN3524_c3_g1	OVC	OV	241.281	0	160.854	22.8367	4.20634	5.42912	5.66×10^-08	2.66×10^-06
TRINITY_DN1099_c0_g2	OVC	OV	94.1931	247.832	145.406	-1.39935	0.257803	-5.428	5.70×10^-08	2.68×10^-06
TRINITY_DN7271_c0_g1	OVC	OV	50.7518	4.34387	35.2825	3.53984	0.65225	5.42712	5.73×10^-08	2.69×10^-06
TRINITY_DN6354_c8_g1	OVC	OV	139.792	0	93.1949	22.8291	4.20657	5.42701	5.73×10^-08	2.69×10^-06
TRINITY_DN8560_c1_g1	OVC	OV	0	194.304	64.7681	-9.78268	1.80263	-5.42689	5.73×10^-08	2.69×10^-06
TRINITY_DN31081_c0_g2	OVC	OV	1284.9	574.49	1048.1	1.16042	0.213839	5.42658	5.74×10^-08	2.69×10^-06
TRINITY_DN74_c4_g2	OVC	OV	138.684	0	92.4562	22.8272	4.20657	5.42656	5.75×10^-08	2.69×10^-06
TRINITY_DN3056_c2_g2	OVC	OV	143.82	0	95.8799	22.8268	4.20655	5.42648	5.75×10^-08	2.69×10^-06
TRINITY_DN2195_c2_g1	OVC	OV	56.0575	148.47	86.8617	-1.40923	0.259719	-5.42597	5.76×10^-08	2.69×10^-06
TRINITY_DN486_c5_g1	OVC	OV	138.257	0	92.1714	22.8229	4.20658	5.42553	5.78×10^-08	2.70×10^-06
TRINITY_DN98443_c0_g1	OVC	OV	0	197.956	65.9854	-9.80954	1.80841	-5.42441	5.81×10^-08	2.71×10^-06
TRINITY_DN7031_c1_g2	OVC	OV	137.741	0	91.8273	22.8173	4.20658	5.42419	5.82×10^-08	2.72×10^-06
TRINITY_DN20406_c0_g1	OVC	OV	310.279	26.4092	215.656	3.55347	0.655199	5.42351	5.84×10^-08	2.72×10^-06
TRINITY_DN11397_c1_g1	OVC	OV	137.71	0	91.8069	22.8071	4.20658	5.42178	5.90×10^-08	2.75×10^-06
TRINITY_DN61238_c0_g1	OVC	OV	136.409	0	90.9396	22.8037	4.20658	5.42095	5.93×10^-08	2.76×10^-06
TRINITY_DN699_c0_g1	OVC	OV	845.14	386.056	692.112	1.13008	0.20852	5.41955	5.98×10^-08	2.78×10^-06
TRINITY_DN22427_c1_g4	OVC	OV	135.419	0	90.2793	22.7932	4.20659	5.41846	6.01×10^-08	2.79×10^-06
TRINITY_DN1613_c1_g1	OVC	OV	11170.9	2575.27	8305.69	2.11698	0.390703	5.4184	6.01×10^-08	2.79×10^-06
TRINITY_DN41460_c1_g1	OVC	OV	135.277	0	90.1846	22.7925	4.20659	5.41829	6.02×10^-08	2.79×10^-06
TRINITY_DN3437_c8_g1	OVC	OV	172.521	0	115.014	22.7861	4.20647	5.41691	6.06×10^-08	2.81×10^-06
TRINITY_DN5354_c1_g1	OVC	OV	134.24	0	89.4936	22.7829	4.20659	5.41599	6.10×10^-08	2.83×10^-06
TRINITY_DN34444_c2_g1	OVC	OV	0	542.387	180.796	-11.2636	2.07983	-5.41566	6.11×10^-08	2.83×10^-06
TRINITY_DN573_c2_g1	OVC	OV	21.1192	125.985	56.0746	-2.55831	0.472444	-5.41506	6.13×10^-08	2.84×10^-06
TRINITY_DN32961_c0_g1	OVC	OV	0	148.323	49.4411	-9.39311	1.73508	-5.41364	6.18×10^-08	2.86×10^-06
TRINITY_DN4059_c1_g1	OVC	OV	167.981	0	111.987	22.7716	4.20648	5.41347	6.18×10^-08	2.86×10^-06
TRINITY_DN12509_c1_g1	OVC	OV	50.0589	0	33.3726	8.6684	1.60172	5.41194	6.23×10^-08	2.88×10^-06
TRINITY_DN18735_c3_g1	OVC	OV	0	219.249	73.0829	-9.95691	1.83991	-5.41162	6.25×10^-08	2.89×10^-06
TRINITY_DN3267_c0_g1	OVC	OV	1549.99	631.112	1243.7	1.29654	0.239663	5.40983	6.31×10^-08	2.91×10^-06
TRINITY_DN44990_c3_g1	OVC	OV	131.893	0	87.9287	22.7568	4.2066	5.40977	6.31×10^-08	2.91×10^-06
TRINITY_DN30447_c2_g1	OVC	OV	224.959	0	149.973	22.7546	4.20637	5.40956	6.32×10^-08	2.91×10^-06
TRINITY_DN7622_c0_g1	OVC	OV	16.6349	701.109	244.793	-5.41533	1.00124	-5.40863	6.35×10^-08	2.93×10^-06
TRINITY_DN7760_c1_g5	OVC	OV	131.284	0	87.5224	22.7511	4.2066	5.40842	6.36×10^-08	2.93×10^-06
TRINITY_DN259_c0_g5	OVC	OV	48.0574	230.795	108.97	-2.27429	0.420517	-5.40833	6.36×10^-08	2.93×10^-06
TRINITY_DN59018_c4_g1	OVC	OV	233.998	0	155.998	22.7476	4.20635	5.40792	6.38×10^-08	2.93×10^-06
TRINITY_DN5786_c8_g1	OVC	OV	250.805	0	167.203	22.739	4.20633	5.40591	6.45×10^-08	2.96×10^-06
TRINITY_DN6243_c5_g1	OVC	OV	130.3	0	86.8669	22.7402	4.20661	5.40584	6.45×10^-08	2.96×10^-06
TRINITY_DN66365_c2_g1	OVC	OV	130.3	0	86.8669	22.7402	4.20661	5.40584	6.45×10^-08	2.96×10^-06
TRINITY_DN25652_c4_g1	OVC	OV	0	147.057	49.0189	-9.38073	1.73531	-5.4058	6.45×10^-08	2.96×10^-06
TRINITY_DN99390_c0_g1	OVC	OV	2139.31	1.33263	1426.65	10.6472	1.97051	5.40327	6.54×10^-08	3.00×10^-06
TRINITY_DN11541_c0_g1	OVC	OV	116.16	23.6926	85.3377	2.29159	0.424123	5.40312	6.55×10^-08	3.00×10^-06
TRINITY_DN6284_c0_g2	OVC	OV	37.23	133.857	69.4389	-1.83807	0.340214	-5.40269	6.56×10^-08	3.01×10^-06
TRINITY_DN86593_c0_g5	OVC	OV	127.839	0	85.2261	22.7082	4.20662	5.3982	6.73×10^-08	3.08×10^-06
TRINITY_DN3777_c0_g1	OVC	OV	16.667	135.123	56.1524	-3.02998	0.561435	-5.39685	6.78×10^-08	3.10×10^-06
TRINITY_DN5837_c2_g1	OVC	OV	0	155.849	51.9495	-9.46451	1.75461	-5.39408	6.89×10^-08	3.15×10^-06
TRINITY_DN10652_c5_g2	OVC	OV	125.192	0	83.4615	22.685	4.20663	5.39267	6.94×10^-08	3.17×10^-06
TRINITY_DN1719_c0_g1	OVC	OV	1109.97	344.479	854.804	1.6878	0.31304	5.39163	6.98×10^-08	3.18×10^-06
TRINITY_DN115524_c0_g1	OVC	OV	0	158.71	52.9034	-9.49074	1.76057	-5.39071	7.02×10^-08	3.20×10^-06
TRINITY_DN13210_c4_g1	OVC	OV	0	190.63	63.5435	-9.75514	1.80975	-5.39034	7.03×10^-08	3.20×10^-06
TRINITY_DN24_c1_g1	OVC	OV	0	190.63	63.5435	-9.75514	1.80975	-5.39034	7.03×10^-08	3.20×10^-06
TRINITY_DN8787_c1_g1	OVC	OV	0	190.63	63.5435	-9.75514	1.80975	-5.39034	7.03×10^-08	3.20×10^-06
TRINITY_DN14458_c1_g1	OVC	OV	0	457.536	152.512	-11.0182	2.04407	-5.39033	7.03×10^-08	3.20×10^-06
TRINITY_DN5207_c3_g1	OVC	OV	47.9109	0	31.9406	8.60367	1.59625	5.38992	7.05×10^-08	3.20×10^-06
TRINITY_DN6101_c1_g1	OVC	OV	826.686	261.946	638.439	1.65754	0.307535	5.38974	7.06×10^-08	3.20×10^-06
TRINITY_DN798_c10_g1	OVC	OV	124.982	0	83.3211	22.6625	4.20663	5.38732	7.15×10^-08	3.24×10^-06
TRINITY_DN48940_c0_g1	OVC	OV	147.776	0	98.5175	22.6619	4.20654	5.38731	7.15×10^-08	3.24×10^-06
TRINITY_DN23821_c0_g2	OVC	OV	233.28	0	155.52	22.6602	4.20635	5.38714	7.16×10^-08	3.24×10^-06
TRINITY_DN3365_c4_g1	OVC	OV	231.045	0	154.03	22.6523	4.20636	5.38526	7.23×10^-08	3.27×10^-06
TRINITY_DN44_c0_g2	OVC	OV	29.9022	121.848	60.5509	-2.03368	0.377712	-5.38422	7.28×10^-08	3.29×10^-06
TRINITY_DN24543_c0_g1	OVC	OV	216.355	0	144.237	22.6467	4.20638	5.3839	7.29×10^-08	3.30×10^-06
TRINITY_DN20988_c2_g1	OVC	OV	121.872	0	81.2483	22.6463	4.20665	5.38346	7.31×10^-08	3.30×10^-06
TRINITY_DN19047_c0_g1	OVC	OV	727.421	152.851	535.898	2.25135	0.418246	5.38284	7.33×10^-08	3.31×10^-06
TRINITY_DN34023_c0_g1	OVC	OV	121.574	0	81.0492	22.6424	4.20665	5.38253	7.34×10^-08	3.31×10^-06
TRINITY_DN1327_c5_g1	OVC	OV	121.247	0	80.8313	22.6405	4.20665	5.38208	7.36×10^-08	3.32×10^-06
TRINITY_DN111014_c0_g2	OVC	OV	0	348.358	116.119	-10.6249	1.97415	-5.382	7.37×10^-08	3.32×10^-06
TRINITY_DN103464_c2_g1	OVC	OV	121.815	0	81.2099	22.6392	4.20665	5.38176	7.38×10^-08	3.32×10^-06
TRINITY_DN14149_c4_g1	OVC	OV	0	145.702	48.5674	-9.36738	1.7406	-5.3817	7.38×10^-08	3.32×10^-06
TRINITY_DN1707_c0_g1	OVC	OV	2440.24	296.131	1725.54	3.04248	0.56534	5.38168	7.38×10^-08	3.32×10^-06
TRINITY_DN47872_c0_g2	OVC	OV	215.338	0	143.558	22.6371	4.20638	5.38161	7.38×10^-08	3.32×10^-06
TRINITY_DN5395_c2_g1	OVC	OV	215.338	0	143.558	22.6371	4.20638	5.38161	7.38×10^-08	3.32×10^-06
TRINITY_DN3271_c0_g1	OVC	OV	120.885	0	80.59	22.6327	4.20665	5.38022	7.44×10^-08	3.34×10^-06
TRINITY_DN12643_c1_g1	OVC	OV	120.293	0	80.1953	22.6289	4.20666	5.3793	7.48×10^-08	3.36×10^-06
TRINITY_DN7160_c0_g1	OVC	OV	1914.83	383.653	1404.44	2.31932	0.43123	5.37838	7.52×10^-08	3.37×10^-06
TRINITY_DN19463_c2_g1	OVC	OV	0	246.305	82.1015	-10.1248	1.88267	-5.37787	7.54×10^-08	3.38×10^-06
TRINITY_DN39669_c0_g1	OVC	OV	214.166	0	142.778	22.6213	4.20638	5.37786	7.54×10^-08	3.38×10^-06
TRINITY_DN6723_c3_g1	OVC	OV	939.357	454.815	777.843	1.04657	0.194615	5.37765	7.55×10^-08	3.38×10^-06
TRINITY_DN66214_c3_g1	OVC	OV	212.332	0	141.555	22.6203	4.20639	5.37762	7.55×10^-08	3.38×10^-06
TRINITY_DN7934_c3_g1	OVC	OV	0	146.099	48.6998	-9.37131	1.74272	-5.3774	7.56×10^-08	3.38×10^-06
TRINITY_DN46184_c4_g1	OVC	OV	0	217.246	72.4154	-9.94367	1.84932	-5.37693	7.58×10^-08	3.39×10^-06
TRINITY_DN1757_c0_g1	OVC	OV	1492.52	629.603	1204.88	1.2457	0.231756	5.37506	7.66×10^-08	3.42×10^-06
TRINITY_DN15241_c2_g2	OVC	OV	0	980.916	326.972	-12.1184	2.25472	-5.37469	7.67×10^-08	3.42×10^-06
TRINITY_DN8361_c1_g1	OVC	OV	4.461	50.2704	19.7308	-3.49927	0.651068	-5.37466	7.67×10^-08	3.42×10^-06
TRINITY_DN12016_c0_g2	OVC	OV	213.149	0	142.099	22.6073	4.20638	5.37453	7.68×10^-08	3.42×10^-06
TRINITY_DN15125_c1_g1	OVC	OV	253.765	75.9803	194.503	1.73691	0.323208	5.37398	7.70×10^-08	3.43×10^-06
TRINITY_DN9416_c3_g1	OVC	OV	0	314.228	104.743	-10.4761	1.94969	-5.37324	7.73×10^-08	3.44×10^-06
TRINITY_DN31793_c1_g1	OVC	OV	118.326	0	78.8837	22.6012	4.20667	5.37271	7.76×10^-08	3.45×10^-06
TRINITY_DN25511_c0_g1	OVC	OV	117.855	0	78.5699	22.6	4.20667	5.37242	7.77×10^-08	3.45×10^-06
TRINITY_DN10560_c6_g2	OVC	OV	234.908	0	156.605	22.5981	4.20635	5.37238	7.77×10^-08	3.45×10^-06
TRINITY_DN6290_c7_g1	OVC	OV	153.862	0	102.574	22.5914	4.20652	5.37057	7.85×10^-08	3.48×10^-06
TRINITY_DN3022_c2_g1	OVC	OV	0	170.239	56.7464	-9.59191	1.78602	-5.37055	7.85×10^-08	3.48×10^-06
TRINITY_DN1014_c0_g1	OVC	OV	1071.08	370.262	837.474	1.53181	0.285247	5.3701	7.87×10^-08	3.49×10^-06
TRINITY_DN16351_c1_g2	OVC	OV	7.37	137.929	50.8897	-4.20209	0.782654	-5.36903	7.92×10^-08	3.51×10^-06
TRINITY_DN935_c11_g1	OVC	OV	0	286.581	95.527	-10.3433	1.92665	-5.36853	7.94×10^-08	3.52×10^-06
TRINITY_DN7597_c1_g1	OVC	OV	22.5943	94.4011	46.5299	-2.04853	0.381596	-5.36832	7.95×10^-08	3.52×10^-06
TRINITY_DN76497_c3_g1	OVC	OV	0	238.098	79.3659	-10.0759	1.87697	-5.36817	7.95×10^-08	3.52×10^-06
TRINITY_DN47812_c0_g4	OVC	OV	689.719	251.072	543.504	1.4576	0.271616	5.36641	8.03×10^-08	3.55×10^-06
TRINITY_DN4020_c4_g1	OVC	OV	0	149.559	49.8531	-9.40507	1.75347	-5.36369	8.15×10^-08	3.60×10^-06
TRINITY_DN8285_c3_g5	OVC	OV	41.4814	143.103	75.3552	-1.78234	0.332424	-5.36164	8.25×10^-08	3.64×10^-06
TRINITY_DN29977_c0_g2	OVC	OV	300.413	0	200.275	11.2518	2.0991	5.3603	8.31×10^-08	3.66×10^-06
TRINITY_DN71640_c0_g1	OVC	OV	169.109	0	112.739	22.5477	4.20648	5.36024	8.31×10^-08	3.66×10^-06
TRINITY_DN6603_c0_g1	OVC	OV	281.795	54.2683	205.953	2.37429	0.443006	5.35949	8.35×10^-08	3.68×10^-06
TRINITY_DN2925_c12_g1	OVC	OV	0	340.606	113.535	-10.5924	1.97656	-5.35902	8.37×10^-08	3.68×10^-06
TRINITY_DN1345_c4_g1	OVC	OV	1383.02	387.874	1051.31	1.83472	0.342388	5.35861	8.39×10^-08	3.69×10^-06
TRINITY_DN1825_c1_g1	OVC	OV	816.773	173.973	602.506	2.23103	0.416506	5.35652	8.48×10^-08	3.73×10^-06
TRINITY_DN15692_c0_g2	OVC	OV	10.3641	62.3814	27.7032	-2.5892	0.483392	-5.35631	8.49×10^-08	3.73×10^-06
TRINITY_DN2500_c1_g1	OVC	OV	11.957	58.9289	27.6143	-2.28945	0.427485	-5.35562	8.53×10^-08	3.74×10^-06
TRINITY_DN13322_c0_g1	OVC	OV	1071.57	3160.99	1768.04	-1.56073	0.291425	-5.3555	8.53×10^-08	3.74×10^-06
TRINITY_DN9773_c0_g1	OVC	OV	2.06814	353.067	119.068	-7.49548	1.39974	-5.35492	8.56×10^-08	3.75×10^-06
TRINITY_DN41061_c0_g1	OVC	OV	28.4601	144.371	67.0971	-2.33077	0.435329	-5.35404	8.60×10^-08	3.77×10^-06
TRINITY_DN6289_c0_g1	OVC	OV	0	151.851	50.6169	-9.42702	1.76074	-5.35401	8.60×10^-08	3.77×10^-06
TRINITY_DN8577_c1_g2	OVC	OV	224.931	0	149.954	22.507	4.20637	5.3507	8.76×10^-08	3.84×10^-06
TRINITY_DN832_c0_g1	OVC	OV	620.22	213.099	484.513	1.54241	0.288308	5.34985	8.80×10^-08	3.85×10^-06
TRINITY_DN1053_c1_g2	OVC	OV	705.273	82.1348	497.56	3.10133	0.579966	5.34744	8.92×10^-08	3.90×10^-06
TRINITY_DN3180_c0_g1	OVC	OV	147.647	18.7228	104.672	2.9802	0.557331	5.34728	8.93×10^-08	3.90×10^-06
TRINITY_DN23090_c2_g1	OVC	OV	45.7946	155.157	82.2486	-1.76933	0.330996	-5.34547	9.02×10^-08	3.94×10^-06
TRINITY_DN13890_c1_g2	OVC	OV	50.0724	0	33.3816	8.66196	1.62072	5.34451	9.07×10^-08	3.96×10^-06
TRINITY_DN14457_c0_g1	OVC	OV	737.249	69.7878	514.762	3.40172	0.636583	5.34372	9.11×10^-08	3.97×10^-06
TRINITY_DN21926_c1_g1	OVC	OV	49.0886	0	32.7258	8.63615	1.61623	5.34339	9.12×10^-08	3.98×10^-06
TRINITY_DN5466_c0_g1	OVC	OV	25.1629	386.695	145.674	-3.93661	0.736926	-5.34193	9.20×10^-08	4.00×10^-06
TRINITY_DN3062_c6_g1	OVC	OV	140.903	0	93.9353	22.4685	4.20657	5.3413	9.23×10^-08	4.01×10^-06
TRINITY_DN28101_c8_g1	OVC	OV	0	170.261	56.7537	-9.59209	1.79661	-5.33899	9.35×10^-08	4.06×10^-06
TRINITY_DN3169_c3_g1	OVC	OV	517.297	225.576	420.057	1.1958	0.224028	5.33774	9.41×10^-08	4.09×10^-06
TRINITY_DN57068_c0_g1	OVC	OV	2440.66	444.205	1775.18	2.45768	0.460441	5.33766	9.42×10^-08	4.09×10^-06
TRINITY_DN48060_c0_g1	OVC	OV	41.134	0	27.4226	8.38537	1.57111	5.33721	9.44×10^-08	4.09×10^-06
TRINITY_DN14759_c0_g1	OVC	OV	0	220.148	73.3825	-9.96283	1.86684	-5.33672	9.46×10^-08	4.10×10^-06
TRINITY_DN43337_c0_g3	OVC	OV	0	212.542	70.8472	-9.91208	1.85748	-5.3363	9.49×10^-08	4.11×10^-06
TRINITY_DN2434_c4_g2	OVC	OV	322.356	0	214.904	22.4428	4.20626	5.33557	9.52×10^-08	4.12×10^-06
TRINITY_DN4269_c4_g1	OVC	OV	13.9118	83.7327	37.1854	-2.56283	0.480342	-5.33542	9.53×10^-08	4.13×10^-06
TRINITY_DN9032_c0_g2	OVC	OV	63.0564	0	42.0376	8.99839	1.68666	5.33504	9.55×10^-08	4.13×10^-06
TRINITY_DN8284_c1_g1	OVC	OV	34.9274	127.274	65.7096	-1.85729	0.348135	-5.33497	9.56×10^-08	4.13×10^-06
TRINITY_DN4878_c2_g1	OVC	OV	42.8797	115.818	67.1926	-1.4337	0.268752	-5.33467	9.57×10^-08	4.14×10^-06
TRINITY_DN10085_c0_g2	OVC	OV	8.08356	54.629	23.5987	-2.76633	0.518574	-5.33448	9.58×10^-08	4.14×10^-06
TRINITY_DN9879_c3_g2	OVC	OV	0	267.625	89.2084	-10.2445	1.92056	-5.33414	9.60×10^-08	4.14×10^-06
TRINITY_DN5538_c0_g2	OVC	OV	0	143.081	47.6936	-9.34119	1.75261	-5.32987	9.83×10^-08	4.23×10^-06
TRINITY_DN6371_c1_g2	OVC	OV	0	143.081	47.6936	-9.34119	1.75261	-5.32987	9.83×10^-08	4.23×10^-06
TRINITY_DN9460_c11_g1	OVC	OV	0	143.081	47.6936	-9.34119	1.75261	-5.32987	9.83×10^-08	4.23×10^-06
TRINITY_DN34154_c0_g1	OVC	OV	103.07	0	68.7131	22.4136	4.20676	5.328	9.93×10^-08	4.27×10^-06
TRINITY_DN19311_c3_g1	OVC	OV	2.87862	53.8784	19.8785	-4.296	0.806406	-5.32734	9.97×10^-08	4.28×10^-06
TRINITY_DN744_c1_g2	OVC	OV	133.83	0	89.2201	22.4094	4.20659	5.32721	9.97×10^-08	4.28×10^-06
TRINITY_DN13551_c0_g1	OVC	OV	234.855	43.5633	171.091	2.43214	0.456554	5.32716	9.98×10^-08	4.28×10^-06
TRINITY_DN3733_c0_g3	OVC	OV	19.6463	81.3695	40.2207	-2.06611	0.387886	-5.32661	1.00×10^-07	4.29×10^-06
TRINITY_DN3020_c1_g3	OVC	OV	7.11278	61.2848	25.1701	-3.07647	0.57758	-5.32648	1.00×10^-07	4.29×10^-06
TRINITY_DN799_c1_g1	OVC	OV	2.16965	76.1269	26.8221	-5.05656	0.949339	-5.3264	1.00×10^-07	4.29×10^-06
TRINITY_DN2306_c14_g1	OVC	OV	163.833	46.1479	124.605	1.82616	0.342933	5.32513	1.01×10^-07	4.32×10^-06
TRINITY_DN773_c1_g1	OVC	OV	54.0569	242.069	116.728	-2.17285	0.40816	-5.32353	1.02×10^-07	4.36×10^-06
TRINITY_DN6675_c0_g1	OVC	OV	1777.54	320.228	1291.77	2.47233	0.464441	5.32324	1.02×10^-07	4.36×10^-06
TRINITY_DN31556_c3_g1	OVC	OV	165.773	0	110.515	22.3867	4.20648	5.32194	1.03×10^-07	4.39×10^-06
TRINITY_DN9287_c1_g1	OVC	OV	39.8432	146.594	75.4266	-1.86873	0.351197	-5.32104	1.03×10^-07	4.41×10^-06
TRINITY_DN9462_c0_g1	OVC	OV	83.0926	322.017	162.734	-1.96203	0.368914	-5.31839	1.05×10^-07	4.47×10^-06
TRINITY_DN51971_c0_g1	OVC	OV	87.2369	0	58.1579	9.46774	1.7803	5.31805	1.05×10^-07	4.48×10^-06
TRINITY_DN10053_c0_g1	OVC	OV	0	502.955	167.652	-11.1547	2.09771	-5.31759	1.05×10^-07	4.49×10^-06
TRINITY_DN39475_c4_g1	OVC	OV	0	230.426	76.8087	-10.0287	1.8863	-5.31657	1.06×10^-07	4.51×10^-06
TRINITY_DN46039_c1_g3	OVC	OV	0	182.951	60.9838	-9.69582	1.82379	-5.31631	1.06×10^-07	4.51×10^-06
TRINITY_DN8486_c1_g2	OVC	OV	0	182.951	60.9838	-9.69582	1.82379	-5.31631	1.06×10^-07	4.51×10^-06
TRINITY_DN20668_c0_g3	OVC	OV	99.5458	0	66.3639	22.3624	4.20679	5.3158	1.06×10^-07	4.52×10^-06
TRINITY_DN23248_c0_g1	OVC	OV	243.614	105.245	197.491	1.20988	0.227642	5.31482	1.07×10^-07	4.54×10^-06
TRINITY_DN21965_c0_g1	OVC	OV	259.226	78.2703	198.908	1.72813	0.325299	5.31243	1.08×10^-07	4.60×10^-06
TRINITY_DN3561_c3_g1	OVC	OV	10.9825	220.587	80.8508	-4.32587	0.814496	-5.3111	1.09×10^-07	4.63×10^-06
TRINITY_DN1705_c0_g4	OVC	OV	30.192	239.329	99.9044	-2.99148	0.563481	-5.30893	1.10×10^-07	4.68×10^-06
TRINITY_DN10386_c0_g2	OVC	OV	127.407	0	84.9383	22.3274	4.20662	5.30767	1.11×10^-07	4.71×10^-06
TRINITY_DN50646_c0_g1	OVC	OV	96.0686	0	64.0457	9.6041	1.8097	5.30702	1.11×10^-07	4.72×10^-06
TRINITY_DN4404_c1_g1	OVC	OV	116.252	1.98795	78.1639	5.86293	1.1049	5.30632	1.12×10^-07	4.74×10^-06
TRINITY_DN52117_c1_g2	OVC	OV	1373.26	2.67992	916.4	9.0013	1.69645	5.30596	1.12×10^-07	4.75×10^-06
TRINITY_DN12316_c3_g1	OVC	OV	0	208.169	69.3895	-9.88209	1.86267	-5.30535	1.12×10^-07	4.76×10^-06
TRINITY_DN76793_c0_g1	OVC	OV	0	208.169	69.3895	-9.88209	1.86267	-5.30535	1.12×10^-07	4.76×10^-06
TRINITY_DN4338_c1_g2	OVC	OV	1602.14	235.17	1146.49	2.76801	0.521849	5.30424	1.13×10^-07	4.78×10^-06
TRINITY_DN1285_c3_g1	OVC	OV	139.727	9.01906	96.1578	3.94954	0.744631	5.30402	1.13×10^-07	4.78×10^-06
TRINITY_DN5156_c0_g1	OVC	OV	0	456.64	152.213	-11.0154	2.07724	-5.30288	1.14×10^-07	4.81×10^-06
TRINITY_DN31732_c0_g1	OVC	OV	28.1509	114.92	57.0738	-2.03102	0.383039	-5.30238	1.14×10^-07	4.82×10^-06
TRINITY_DN630_c5_g1	OVC	OV	364.801	106.181	278.594	1.77885	0.335482	5.30236	1.14×10^-07	4.82×10^-06
TRINITY_DN8676_c1_g2	OVC	OV	66.6767	3.3499	45.5678	4.31761	0.814544	5.30064	1.15×10^-07	4.86×10^-06
TRINITY_DN1212_c1_g1	OVC	OV	236.168	509.529	327.288	-1.11202	0.209861	-5.29887	1.17×10^-07	4.90×10^-06
TRINITY_DN2159_c0_g1	OVC	OV	535.582	55.3209	375.495	3.27603	0.618447	5.29719	1.18×10^-07	4.95×10^-06
TRINITY_DN131915_c1_g1	OVC	OV	0	315.987	105.329	-10.4842	1.97941	-5.29662	1.18×10^-07	4.96×10^-06
TRINITY_DN4544_c2_g1	OVC	OV	2624.89	837.304	2029.03	1.64835	0.311222	5.29638	1.18×10^-07	4.96×10^-06
TRINITY_DN93501_c4_g1	OVC	OV	0	140.35	46.7832	-9.31338	1.75909	-5.29442	1.19×10^-07	5.01×10^-06
TRINITY_DN48_c3_g1	OVC	OV	8293.71	674.055	5753.82	3.62113	0.683982	5.29419	1.20×10^-07	5.02×10^-06
TRINITY_DN8702_c0_g1	OVC	OV	431.561	37.1655	300.096	3.53816	0.668376	5.29367	1.20×10^-07	5.03×10^-06
TRINITY_DN99141_c0_g1	OVC	OV	91.8861	0	61.2574	22.2534	4.20685	5.28981	1.22×10^-07	5.13×10^-06
TRINITY_DN23738_c1_g1	OVC	OV	91.7358	0	61.1572	22.2501	4.20685	5.28902	1.23×10^-07	5.15×10^-06
TRINITY_DN4624_c0_g1	OVC	OV	1085.34	275.457	815.381	1.97868	0.374164	5.28826	1.23×10^-07	5.17×10^-06
TRINITY_DN13068_c0_g1	OVC	OV	73374.9	170.997	48973.6	8.74514	1.65385	5.28774	1.24×10^-07	5.18×10^-06
TRINITY_DN5576_c0_g2	OVC	OV	446.415	118.277	337.036	1.91465	0.362227	5.28577	1.25×10^-07	5.23×10^-06
TRINITY_DN13491_c3_g1	OVC	OV	0	268.918	89.6394	-10.2515	1.94032	-5.28341	1.27×10^-07	5.30×10^-06
TRINITY_DN50969_c0_g4	OVC	OV	0	268.918	89.6394	-10.2515	1.94032	-5.28341	1.27×10^-07	5.30×10^-06
TRINITY_DN1428_c0_g1	OVC	OV	768.457	338.568	625.161	1.18367	0.224164	5.28038	1.29×10^-07	5.38×10^-06
TRINITY_DN127727_c0_g1	OVC	OV	0	140.07	46.6899	-9.3105	1.76362	-5.27919	1.30×10^-07	5.41×10^-06
TRINITY_DN20731_c2_g1	OVC	OV	0	178.946	59.6487	-9.66389	1.83074	-5.27868	1.30×10^-07	5.42×10^-06
TRINITY_DN1901_c4_g1	OVC	OV	46374.1	14909.5	35885.9	1.63708	0.31017	5.27801	1.31×10^-07	5.44×10^-06
TRINITY_DN444_c3_g1	OVC	OV	286.674	0	191.116	22.1981	4.20629	5.27736	1.31×10^-07	5.46×10^-06
TRINITY_DN72295_c5_g1	OVC	OV	0	142.83	47.6101	-9.33865	1.77006	-5.27588	1.32×10^-07	5.50×10^-06
TRINITY_DN1613_c0_g2	OVC	OV	264.104	68.9419	199.05	1.93835	0.367615	5.27276	1.34×10^-07	5.59×10^-06
TRINITY_DN15679_c0_g1	OVC	OV	6681.66	2615.22	5326.18	1.35339	0.256687	5.27253	1.35×10^-07	5.59×10^-06
TRINITY_DN19639_c3_g2	OVC	OV	87.0343	0	58.0229	22.1791	4.2069	5.27208	1.35×10^-07	5.60×10^-06
TRINITY_DN8806_c0_g1	OVC	OV	273.026	107.867	217.973	1.34247	0.254782	5.26907	1.37×10^-07	5.69×10^-06
TRINITY_DN47508_c1_g1	OVC	OV	0	181.928	60.6427	-9.68773	1.83897	-5.26802	1.38×10^-07	5.72×10^-06
TRINITY_DN8573_c0_g1	OVC	OV	320.61	1922.31	854.509	-2.5857	0.490943	-5.2668	1.39×10^-07	5.75×10^-06
TRINITY_DN43335_c0_g1	OVC	OV	120.8	38.8148	93.4717	1.63769	0.310952	5.26669	1.39×10^-07	5.75×10^-06
TRINITY_DN8044_c0_g2	OVC	OV	1036.98	313.448	795.8	1.72586	0.327703	5.26654	1.39×10^-07	5.76×10^-06
TRINITY_DN5538_c4_g1	OVC	OV	0	375.435	125.145	-10.7329	2.03836	-5.26547	1.40×10^-07	5.79×10^-06
TRINITY_DN12409_c0_g1	OVC	OV	892.251	174.112	652.872	2.35775	0.447816	5.265	1.40×10^-07	5.80×10^-06
TRINITY_DN10077_c0_g1	OVC	OV	30.1364	106.166	55.4796	-1.80409	0.342762	-5.26339	1.41×10^-07	5.85×10^-06
TRINITY_DN788_c2_g1	OVC	OV	0.612336	147.146	49.457	-7.90952	1.50281	-5.26315	1.42×10^-07	5.85×10^-06
TRINITY_DN72787_c2_g1	OVC	OV	93.4293	3.66656	63.5084	4.66885	0.887158	5.2627	1.42×10^-07	5.86×10^-06
TRINITY_DN8180_c0_g1	OVC	OV	859.965	2481.74	1400.56	-1.52894	0.290547	-5.26227	1.42×10^-07	5.87×10^-06
TRINITY_DN8416_c5_g1	OVC	OV	53.6273	0	35.7515	8.76149	1.66523	5.26143	1.43×10^-07	5.89×10^-06
TRINITY_DN13828_c2_g1	OVC	OV	11.8941	63.2654	29.0178	-2.43421	0.462844	-5.25925	1.45×10^-07	5.96×10^-06
TRINITY_DN53476_c4_g1	OVC	OV	44.197	0	29.4647	8.4846	1.61451	5.25521	1.48×10^-07	6.09×10^-06
TRINITY_DN56645_c5_g1	OVC	OV	44.197	0	29.4647	8.4846	1.61451	5.25521	1.48×10^-07	6.09×10^-06
TRINITY_DN21762_c0_g3	OVC	OV	0	197.722	65.9072	-9.80781	1.86638	-5.255	1.48×10^-07	6.09×10^-06
TRINITY_DN11879_c0_g1	OVC	OV	56.2428	1.67861	38.0547	5.07166	0.965341	5.25375	1.49×10^-07	6.13×10^-06
TRINITY_DN3403_c1_g2	OVC	OV	1061.65	259.223	794.175	2.03329	0.387153	5.2519	1.51×10^-07	6.19×10^-06
TRINITY_DN5092_c0_g2	OVC	OV	409.73	33.5136	284.324	3.61266	0.6882	5.24944	1.53×10^-07	6.26×10^-06
TRINITY_DN4881_c0_g1	OVC	OV	527.148	157.312	403.869	1.74492	0.332437	5.24888	1.53×10^-07	6.28×10^-06
TRINITY_DN164_c5_g1	OVC	OV	0	311.297	103.766	-10.4626	1.99337	-5.24872	1.53×10^-07	6.28×10^-06
TRINITY_DN6241_c4_g1	OVC	OV	16.6962	80.0735	37.822	-2.2549	0.429621	-5.24857	1.53×10^-07	6.28×10^-06
TRINITY_DN6361_c0_g2	OVC	OV	78.3573	242.76	133.158	-1.62897	0.310505	-5.2462	1.55×10^-07	6.36×10^-06
TRINITY_DN15111_c0_g1	OVC	OV	64.2907	7.7011	45.4275	3.05353	0.582152	5.24524	1.56×10^-07	6.39×10^-06
TRINITY_DN4172_c0_g2	OVC	OV	107.258	0	71.5054	9.76357	1.86152	5.24494	1.56×10^-07	6.40×10^-06
TRINITY_DN6480_c0_g1	OVC	OV	252.129	0	168.086	22.0587	4.20633	5.24417	1.57×10^-07	6.42×10^-06
TRINITY_DN13271_c5_g1	OVC	OV	0	466.313	155.438	-11.0456	2.10644	-5.24374	1.57×10^-07	6.43×10^-06
TRINITY_DN151_c12_g1	OVC	OV	0	199.422	66.474	-9.82016	1.87392	-5.24042	1.60×10^-07	6.54×10^-06
TRINITY_DN82999_c0_g3	OVC	OV	0	178.924	59.6414	-9.66371	1.84437	-5.23958	1.61×10^-07	6.57×10^-06
TRINITY_DN2019_c0_g1	OVC	OV	3710.36	1364.03	2928.25	1.44355	0.275531	5.23916	1.61×10^-07	6.58×10^-06
TRINITY_DN53845_c2_g1	OVC	OV	0	175.272	58.4241	-9.63396	1.83889	-5.23901	1.61×10^-07	6.58×10^-06
TRINITY_DN38345_c1_g1	OVC	OV	34992.2	7412.44	25798.9	2.23903	0.427384	5.23891	1.62×10^-07	6.58×10^-06
TRINITY_DN6048_c1_g1	OVC	OV	509.353	1825.7	948.134	-1.84166	0.351536	-5.23888	1.62×10^-07	6.58×10^-06
TRINITY_DN1541_c3_g1	OVC	OV	107.453	24.7892	79.8982	2.11631	0.403971	5.23876	1.62×10^-07	6.58×10^-06
TRINITY_DN105853_c0_g2	OVC	OV	0	161.695	53.8984	-9.51764	1.81705	-5.23797	1.62×10^-07	6.60×10^-06
TRINITY_DN2298_c0_g2	OVC	OV	1590.26	673.095	1284.54	1.24063	0.236884	5.23727	1.63×10^-07	6.62×10^-06
TRINITY_DN271_c0_g3	OVC	OV	7.29007	368.464	127.681	-5.64056	1.07726	-5.23605	1.64×10^-07	6.66×10^-06
TRINITY_DN14945_c0_g1	OVC	OV	1372.92	662.369	1136.07	1.05106	0.200752	5.2356	1.64×10^-07	6.67×10^-06
TRINITY_DN15723_c2_g1	OVC	OV	0	243.705	81.2351	-10.1095	1.93108	-5.23513	1.65×10^-07	6.69×10^-06
TRINITY_DN1333_c2_g1	OVC	OV	38.3726	4.01988	26.9217	3.24559	0.620024	5.23463	1.65×10^-07	6.70×10^-06
TRINITY_DN4201_c0_g1	OVC	OV	360.085	150.657	290.276	1.25678	0.240119	5.234	1.66×10^-07	6.72×10^-06
TRINITY_DN57876_c0_g1	OVC	OV	169.565	0	113.043	22.0019	4.20647	5.23049	1.69×10^-07	6.84×10^-06
TRINITY_DN4406_c5_g1	OVC	OV	14.9241	267.509	99.1192	-4.18358	0.799848	-5.23047	1.69×10^-07	6.84×10^-06
TRINITY_DN29954_c0_g2	OVC	OV	3.86796	42.8347	16.8569	-3.47546	0.664557	-5.22974	1.70×10^-07	6.87×10^-06
TRINITY_DN12775_c0_g1	OVC	OV	51.8598	199.705	101.142	-1.94068	0.371119	-5.22928	1.70×10^-07	6.88×10^-06
TRINITY_DN708_c1_g1	OVC	OV	976.595	438.527	797.239	1.15475	0.220827	5.22922	1.70×10^-07	6.88×10^-06
TRINITY_DN645_c0_g1	OVC	OV	1255.96	3.00391	838.305	8.7072	1.66546	5.22811	1.71×10^-07	6.92×10^-06
TRINITY_DN9399_c1_g7	OVC	OV	0	282.812	94.2706	-10.3242	1.97632	-5.22396	1.75×10^-07	7.07×10^-06
TRINITY_DN13063_c5_g1	OVC	OV	86.6435	231.026	134.771	-1.40999	0.270026	-5.22168	1.77×10^-07	7.15×10^-06
TRINITY_DN451_c0_g1	OVC	OV	2840.5	1049.3	2243.43	1.43686	0.275228	5.2206	1.78×10^-07	7.19×10^-06
TRINITY_DN1828_c0_g2	OVC	OV	9.92805	72.5557	30.8039	-2.88126	0.551984	-5.21982	1.79×10^-07	7.22×10^-06
TRINITY_DN2138_c0_g2	OVC	OV	98.5099	4.71184	67.2439	4.38841	0.840984	5.21819	1.81×10^-07	7.28×10^-06
TRINITY_DN16601_c0_g1	OVC	OV	7.45267	126.884	47.2631	-4.13269	0.792141	-5.21711	1.82×10^-07	7.31×10^-06
TRINITY_DN26019_c1_g3	OVC	OV	0	159.693	53.2309	-9.49966	1.82101	-5.2167	1.82×10^-07	7.33×10^-06
TRINITY_DN2535_c0_g2	OVC	OV	2532.08	858.371	1974.18	1.56064	0.29926	5.21498	1.84×10^-07	7.39×10^-06
TRINITY_DN16417_c0_g2	OVC	OV	8755.85	1937.56	6483.09	2.17605	0.417271	5.21497	1.84×10^-07	7.39×10^-06
TRINITY_DN2800_c1_g1	OVC	OV	48.744	164.513	87.3337	-1.74372	0.33448	-5.21322	1.86×10^-07	7.45×10^-06
TRINITY_DN2811_c1_g1	OVC	OV	38.3489	0	25.5659	8.27903	1.58868	5.21126	1.88×10^-07	7.52×10^-06
TRINITY_DN29727_c8_g1	OVC	OV	203.228	0	135.485	21.9128	4.2064	5.20938	1.89×10^-07	7.59×10^-06
TRINITY_DN33025_c0_g1	OVC	OV	39.6977	1.33263	26.9093	4.89273	0.939445	5.2081	1.91×10^-07	7.64×10^-06
TRINITY_DN5144_c0_g2	OVC	OV	40.9241	0	27.2827	8.37892	1.60889	5.20789	1.91×10^-07	7.64×10^-06
TRINITY_DN68079_c0_g2	OVC	OV	156.673	2.67992	105.342	5.87123	1.12787	5.20558	1.93×10^-07	7.73×10^-06
TRINITY_DN18101_c3_g1	OVC	OV	119.385	0	79.5899	21.8937	4.20666	5.20454	1.94×10^-07	7.77×10^-06
TRINITY_DN4712_c0_g2	OVC	OV	21.6264	142.883	62.0453	-2.73083	0.524887	-5.2027	1.96×10^-07	7.84×10^-06
TRINITY_DN7274_c1_g1	OVC	OV	215.128	0	143.419	21.8841	4.20638	5.20259	1.97×10^-07	7.84×10^-06
TRINITY_DN1863_c3_g1	OVC	OV	0	152.396	50.7987	-9.43219	1.81307	-5.20234	1.97×10^-07	7.85×10^-06
TRINITY_DN4372_c8_g1	OVC	OV	216.097	0	144.065	21.8791	4.20638	5.20141	1.98×10^-07	7.88×10^-06
TRINITY_DN9118_c0_g1	OVC	OV	1154.45	320.633	876.513	1.84762	0.355347	5.19948	2.00×10^-07	7.96×10^-06
TRINITY_DN2794_c0_g2	OVC	OV	0	137.11	45.7032	-9.27968	1.78493	-5.19891	2.00×10^-07	7.98×10^-06
TRINITY_DN68932_c2_g1	OVC	OV	0	171.93	57.3099	-9.60618	1.84825	-5.19744	2.02×10^-07	8.04×10^-06
TRINITY_DN1023_c8_g1	OVC	OV	139.609	0	93.0724	21.859	4.20657	5.1964	2.03×10^-07	8.08×10^-06
TRINITY_DN12413_c0_g1	OVC	OV	139.681	0	93.1207	21.8566	4.20657	5.19584	2.04×10^-07	8.10×10^-06
TRINITY_DN7992_c0_g1	OVC	OV	2186.27	611.895	1661.48	1.83742	0.353732	5.19437	2.05×10^-07	8.16×10^-06
TRINITY_DN3606_c0_g1	OVC	OV	11785.8	2220.99	8597.52	2.40774	0.463611	5.19345	2.06×10^-07	8.19×10^-06
TRINITY_DN4905_c0_g2	OVC	OV	203.661	2.33393	136.552	6.44646	1.24128	5.19341	2.06×10^-07	8.19×10^-06
TRINITY_DN1275_c0_g2	OVC	OV	1493.25	670.503	1219	1.15456	0.222318	5.19327	2.07×10^-07	8.19×10^-06
TRINITY_DN8032_c0_g1	OVC	OV	455.903	1167.51	693.106	-1.35844	0.261591	-5.193	2.07×10^-07	8.20×10^-06
TRINITY_DN12541_c0_g3	OVC	OV	229.351	0	152.901	21.8361	4.20636	5.1912	2.09×10^-07	8.27×10^-06
TRINITY_DN12095_c4_g1	OVC	OV	44.1172	0	29.4115	8.48587	1.63486	5.19059	2.10×10^-07	8.29×10^-06
TRINITY_DN97532_c1_g1	OVC	OV	206.971	0	137.98	21.8322	4.20639	5.19025	2.10×10^-07	8.30×10^-06
TRINITY_DN784_c0_g1	OVC	OV	1541.59	461.028	1181.4	1.74191	0.33564	5.1898	2.11×10^-07	8.31×10^-06
TRINITY_DN2900_c0_g3	OVC	OV	136.256	11.029	94.5135	3.62813	0.699122	5.18955	2.11×10^-07	8.32×10^-06
TRINITY_DN7464_c1_g1	OVC	OV	328.14	809.084	488.455	-1.30294	0.251104	-5.18885	2.12×10^-07	8.35×10^-06
TRINITY_DN7216_c0_g1	OVC	OV	532.735	219.076	428.182	1.28137	0.246966	5.18847	2.12×10^-07	8.36×10^-06
TRINITY_DN1891_c2_g1	OVC	OV	163.562	43.6	123.575	1.90566	0.367292	5.18839	2.12×10^-07	8.36×10^-06
TRINITY_DN11783_c0_g2	OVC	OV	2301.3	871.405	1824.67	1.40071	0.269998	5.18785	2.13×10^-07	8.38×10^-06
TRINITY_DN120_c4_g1	OVC	OV	187.997	0	125.331	21.8022	4.20643	5.18307	2.18×10^-07	8.59×10^-06
TRINITY_DN29692_c0_g3	OVC	OV	4079.66	715.387	2958.23	2.51152	0.484656	5.18206	2.19×10^-07	8.63×10^-06
TRINITY_DN3194_c0_g1	OVC	OV	0	133.643	44.5475	-9.24274	1.78377	-5.18157	2.20×10^-07	8.64×10^-06
TRINITY_DN6456_c0_g1	OVC	OV	48.9048	208.891	102.234	-2.09922	0.405138	-5.1815	2.20×10^-07	8.64×10^-06
TRINITY_DN3667_c1_g1	OVC	OV	616.498	0.669979	411.222	9.84599	1.90023	5.18147	2.20×10^-07	8.64×10^-06
TRINITY_DN20433_c0_g1	OVC	OV	0	134.032	44.6775	-9.24694	1.78512	-5.18	2.22×10^-07	8.71×10^-06
TRINITY_DN6338_c0_g1	OVC	OV	92530.1	181.456	61747.2	8.99414	1.73692	5.17823	2.24×10^-07	8.78×10^-06
TRINITY_DN29750_c0_g2	OVC	OV	233.857	108.169	191.961	1.11559	0.215441	5.17818	2.24×10^-07	8.78×10^-06
TRINITY_DN11428_c0_g1	OVC	OV	629.34	46.8179	435.166	3.74843	0.724017	5.17726	2.25×10^-07	8.82×10^-06
TRINITY_DN35836_c1_g1	OVC	OV	70.3387	0	46.8924	9.15683	1.76979	5.17398	2.29×10^-07	8.97×10^-06
TRINITY_DN2883_c1_g2	OVC	OV	23.6284	91.1318	46.1296	-1.93705	0.374522	-5.17207	2.32×10^-07	9.06×10^-06
TRINITY_DN2327_c0_g1	OVC	OV	373.812	20.438	256.021	4.19363	0.810978	5.17108	2.33×10^-07	9.10×10^-06
TRINITY_DN61_c28_g1	OVC	OV	0	247.258	82.4192	-10.1304	1.95948	-5.16992	2.34×10^-07	9.15×10^-06
TRINITY_DN6819_c4_g1	OVC	OV	248.787	39.2634	178.946	2.66508	0.515509	5.1698	2.34×10^-07	9.15×10^-06
TRINITY_DN27441_c0_g2	OVC	OV	1.3151	64.1567	22.2623	-5.71635	1.10598	-5.16858	2.36×10^-07	9.21×10^-06
TRINITY_DN6366_c2_g1	OVC	OV	0	168.594	56.1981	-9.57792	1.85318	-5.16837	2.36×10^-07	9.21×10^-06
TRINITY_DN979_c0_g1	OVC	OV	6338.15	1276.28	4650.86	2.31213	0.447446	5.1674	2.37×10^-07	9.25×10^-06
TRINITY_DN38597_c3_g1	OVC	OV	0	133.017	44.3388	-9.23596	1.78795	-5.16566	2.40×10^-07	9.33×10^-06
TRINITY_DN9642_c0_g1	OVC	OV	138.316	38.4835	105.038	1.84958	0.358078	5.16531	2.40×10^-07	9.35×10^-06
TRINITY_DN2282_c5_g1	OVC	OV	164.991	0	109.994	21.7234	4.20649	5.16426	2.41×10^-07	9.39×10^-06
TRINITY_DN69254_c2_g1	OVC	OV	164.991	0	109.994	21.7234	4.20649	5.16426	2.41×10^-07	9.39×10^-06
TRINITY_DN10064_c2_g1	OVC	OV	4.42802	97.5223	35.4594	-4.41678	0.855296	-5.16404	2.42×10^-07	9.39×10^-06
TRINITY_DN23953_c4_g1	OVC	OV	1359.57	235.369	984.835	2.53053	0.490107	5.16322	2.43×10^-07	9.43×10^-06
TRINITY_DN9806_c6_g1	OVC	OV	162.58	0	108.387	21.7155	4.20649	5.16237	2.44×10^-07	9.47×10^-06
TRINITY_DN116139_c3_g1	OVC	OV	178.88	0	119.253	21.7142	4.20645	5.16211	2.44×10^-07	9.48×10^-06
TRINITY_DN2097_c13_g1	OVC	OV	1177.45	537.046	963.983	1.13328	0.219587	5.16097	2.46×10^-07	9.52×10^-06
TRINITY_DN165_c0_g1	OVC	OV	2958.6	1379.63	2432.28	1.1008	0.213403	5.15832	2.49×10^-07	9.65×10^-06
TRINITY_DN1945_c1_g1	OVC	OV	2291.5	1.33996	1528.11	10.7399	2.08229	5.15773	2.50×10^-07	9.67×10^-06
TRINITY_DN12459_c0_g2	OVC	OV	1.42282	47.8779	16.9078	-5.02733	0.974843	-5.15706	2.51×10^-07	9.70×10^-06
TRINITY_DN2736_c2_g1	OVC	OV	1487.97	125.301	1033.75	3.57011	0.692491	5.15546	2.53×10^-07	9.78×10^-06
TRINITY_DN10901_c1_g1	OVC	OV	34.969	0	23.3126	8.14844	1.58134	5.15286	2.57×10^-07	9.91×10^-06
TRINITY_DN55015_c0_g2	OVC	OV	191.51	0	127.673	21.675	4.20642	5.15284	2.57×10^-07	9.91×10^-06
TRINITY_DN4697_c1_g1	OVC	OV	384.458	89.3873	286.101	2.10619	0.408874	5.15119	2.59×10^-07	9.99×10^-06
TRINITY_DN48015_c1_g1	OVC	OV	44.438	0	29.6254	8.49526	1.64946	5.15034	2.60×10^-07	1.00×10^-05
TRINITY_DN3447_c2_g1	OVC	OV	35.429	0	23.6193	8.16248	1.58582	5.14717	2.64×10^-07	1.02×10^-05
TRINITY_DN29829_c3_g1	OVC	OV	160.27	0	106.847	21.6493	4.2065	5.14663	2.65×10^-07	1.02×10^-05
TRINITY_DN25597_c0_g1	OVC	OV	0.689379	64.5614	21.98	-6.73559	1.30874	-5.14661	2.65×10^-07	1.02×10^-05
TRINITY_DN5164_c4_g1	OVC	OV	862.608	152.939	626.051	2.49583	0.485043	5.14559	2.67×10^-07	1.03×10^-05
TRINITY_DN1095_c0_g1	OVC	OV	149.441	386.82	228.567	-1.37341	0.266911	-5.14558	2.67×10^-07	1.03×10^-05
TRINITY_DN1200_c3_g1	OVC	OV	676.111	166.133	506.118	2.02385	0.393482	5.14342	2.70×10^-07	1.04×10^-05
TRINITY_DN5964_c0_g2	OVC	OV	58.5059	2.03193	39.6812	4.85766	0.944478	5.14322	2.70×10^-07	1.04×10^-05
TRINITY_DN7475_c0_g1	OVC	OV	121.295	0	80.8636	9.94367	1.93339	5.14314	2.70×10^-07	1.04×10^-05
TRINITY_DN22929_c1_g1	OVC	OV	12.6933	63.2874	29.558	-2.29869	0.447006	-5.14241	2.71×10^-07	1.04×10^-05
TRINITY_DN1370_c7_g1	OVC	OV	0	228.313	76.1045	-10.0154	1.94806	-5.14121	2.73×10^-07	1.05×10^-05
TRINITY_DN484_c1_g1	OVC	OV	3958.01	897.69	2937.91	2.14061	0.416375	5.14107	2.73×10^-07	1.05×10^-05
TRINITY_DN23687_c0_g1	OVC	OV	0	242.258	80.7528	-10.1009	1.96485	-5.14081	2.74×10^-07	1.05×10^-05
TRINITY_DN115461_c1_g1	OVC	OV	159.628	0	106.419	21.6208	4.2065	5.13986	2.75×10^-07	1.05×10^-05
TRINITY_DN27666_c0_g1	OVC	OV	2948.27	435.94	2110.82	2.75748	0.536533	5.13944	2.76×10^-07	1.06×10^-05
TRINITY_DN79847_c0_g1	OVC	OV	50.6881	0	33.792	8.68435	1.69017	5.13815	2.77×10^-07	1.06×10^-05
TRINITY_DN12370_c0_g1	OVC	OV	19.3456	74.7283	37.8065	-1.95514	0.380527	-5.13797	2.78×10^-07	1.06×10^-05
TRINITY_DN10976_c0_g4	OVC	OV	67.7651	0	45.1768	9.10579	1.77261	5.13694	2.79×10^-07	1.07×10^-05
TRINITY_DN11788_c0_g1	OVC	OV	0	133.201	44.4004	-9.23797	1.79857	-5.13628	2.80×10^-07	1.07×10^-05
TRINITY_DN2535_c0_g1	OVC	OV	612.267	292.56	505.698	1.06386	0.207132	5.13614	2.80×10^-07	1.07×10^-05
TRINITY_DN7626_c2_g2	OVC	OV	0	187.319	62.4395	-9.72983	1.8945	-5.13584	2.81×10^-07	1.07×10^-05
TRINITY_DN459_c1_g1	OVC	OV	0	182.246	60.7487	-9.69022	1.88709	-5.13501	2.82×10^-07	1.08×10^-05
TRINITY_DN7621_c4_g1	OVC	OV	66.4888	10.0497	47.6757	2.72145	0.530202	5.13286	2.85×10^-07	1.09×10^-05
TRINITY_DN33382_c2_g3	OVC	OV	0	131.353	43.7842	-9.2178	1.79659	-5.13071	2.89×10^-07	1.10×10^-05
TRINITY_DN61120_c0_g1	OVC	OV	0	131.353	43.7842	-9.2178	1.79659	-5.13071	2.89×10^-07	1.10×10^-05
TRINITY_DN6823_c0_g1	OVC	OV	6.17039	73.2418	28.5275	-3.53153	0.688327	-5.1306	2.89×10^-07	1.10×10^-05
TRINITY_DN10590_c1_g1	OVC	OV	156.181	0	104.121	21.58	4.20651	5.13013	2.90×10^-07	1.10×10^-05
TRINITY_DN41558_c0_g1	OVC	OV	210.596	0	140.397	10.7382	2.09331	5.12976	2.90×10^-07	1.10×10^-05
TRINITY_DN78026_c6_g1	OVC	OV	168.763	0	112.509	21.5761	4.20648	5.12927	2.91×10^-07	1.11×10^-05
TRINITY_DN3157_c2_g1	OVC	OV	30.7005	0	20.467	7.95136	1.55023	5.12914	2.91×10^-07	1.11×10^-05
TRINITY_DN13856_c1_g1	OVC	OV	28.1915	0	18.7944	7.84082	1.52926	5.1272	2.94×10^-07	1.12×10^-05
TRINITY_DN6524_c0_g2	OVC	OV	2591.6	901.188	2028.13	1.52363	0.297198	5.12665	2.95×10^-07	1.12×10^-05
TRINITY_DN35366_c1_g3	OVC	OV	0	142.412	47.4708	-9.33444	1.82089	-5.12631	2.95×10^-07	1.12×10^-05
TRINITY_DN1239_c3_g1	OVC	OV	14.2784	76.8336	35.1301	-2.44601	0.477154	-5.12626	2.96×10^-07	1.12×10^-05
TRINITY_DN29710_c2_g1	OVC	OV	15.1582	89.3051	39.8738	-2.56048	0.499495	-5.12613	2.96×10^-07	1.12×10^-05
TRINITY_DN2445_c2_g1	OVC	OV	1297.62	23.096	872.776	5.81218	1.13419	5.12453	2.98×10^-07	1.13×10^-05
TRINITY_DN12597_c1_g1	OVC	OV	0	191.044	63.6812	-9.75824	1.90425	-5.12447	2.98×10^-07	1.13×10^-05
TRINITY_DN5368_c0_g1	OVC	OV	56.2906	0	37.5271	8.83845	1.7249	5.12403	2.99×10^-07	1.13×10^-05
TRINITY_DN88306_c1_g1	OVC	OV	0	279.286	93.0953	-10.3061	2.01157	-5.12339	3.00×10^-07	1.13×10^-05
TRINITY_DN15077_c0_g2	OVC	OV	2.58584	94.3058	33.1592	-5.2562	1.02601	-5.12294	3.01×10^-07	1.14×10^-05
TRINITY_DN5107_c6_g1	OVC	OV	0	130.668	43.556	-9.21026	1.79791	-5.12276	3.01×10^-07	1.14×10^-05
TRINITY_DN70164_c1_g1	OVC	OV	156.909	0	104.606	21.5482	4.20651	5.12257	3.01×10^-07	1.14×10^-05
TRINITY_DN20794_c0_g2	OVC	OV	3.52623	43.2027	16.7517	-3.60751	0.704358	-5.1217	3.03×10^-07	1.14×10^-05
TRINITY_DN3717_c0_g1	OVC	OV	73.225	355.724	167.391	-2.27542	0.444356	-5.12072	3.04×10^-07	1.15×10^-05
TRINITY_DN7051_c4_g1	OVC	OV	0	135.477	45.1588	-9.2624	1.80882	-5.12068	3.04×10^-07	1.15×10^-05
TRINITY_DN3997_c0_g3	OVC	OV	194.305	492.125	293.579	-1.34122	0.261941	-5.12032	3.05×10^-07	1.15×10^-05
TRINITY_DN19118_c8_g1	OVC	OV	144.487	0	96.3248	21.5308	4.20655	5.11839	3.08×10^-07	1.16×10^-05
TRINITY_DN830_c3_g1	OVC	OV	144.487	0	96.3248	21.5308	4.20655	5.11839	3.08×10^-07	1.16×10^-05
TRINITY_DN10687_c0_g1	OVC	OV	31.8372	0	21.2248	8.01084	1.56549	5.11713	3.10×10^-07	1.17×10^-05
TRINITY_DN17290_c0_g1	OVC	OV	1.35916	44.5206	15.7463	-4.94159	0.965935	-5.11587	3.12×10^-07	1.17×10^-05
TRINITY_DN9435_c1_g1	OVC	OV	370.585	16.7275	252.633	4.47014	0.873992	5.11462	3.14×10^-07	1.18×10^-05
TRINITY_DN7450_c0_g2	OVC	OV	173.299	53.8637	133.487	1.68158	0.328917	5.11246	3.18×10^-07	1.19×10^-05
TRINITY_DN25005_c0_g1	OVC	OV	1488.79	118.226	1031.93	3.65464	0.714853	5.11244	3.18×10^-07	1.19×10^-05
TRINITY_DN4177_c15_g1	OVC	OV	149.091	0	99.3941	21.4997	4.20654	5.11103	3.20×10^-07	1.20×10^-05
TRINITY_DN36782_c0_g1	OVC	OV	149.375	0	99.5832	21.4965	4.20653	5.11026	3.22×10^-07	1.20×10^-05
TRINITY_DN53644_c1_g2	OVC	OV	149.375	0	99.5832	21.4965	4.20653	5.11026	3.22×10^-07	1.20×10^-05
TRINITY_DN6581_c0_g1	OVC	OV	1020.2	444.941	828.448	1.19616	0.234076	5.11013	3.22×10^-07	1.20×10^-05
TRINITY_DN39239_c2_g1	OVC	OV	0	201.741	67.2472	-9.83687	1.92585	-5.10781	3.26×10^-07	1.22×10^-05
TRINITY_DN2113_c2_g1	OVC	OV	160.151	0	106.767	21.4845	4.2065	5.10745	3.27×10^-07	1.22×10^-05
TRINITY_DN11658_c0_g1	OVC	OV	6.23176	149.501	53.9881	-4.60625	0.902268	-5.10519	3.30×10^-07	1.23×10^-05
TRINITY_DN428_c8_g1	OVC	OV	146.94	0	97.9602	21.4716	4.20654	5.10433	3.32×10^-07	1.24×10^-05
TRINITY_DN2381_c6_g1	OVC	OV	26.2602	0	17.5068	7.73588	1.5159	5.10317	3.34×10^-07	1.25×10^-05
TRINITY_DN2837_c0_g2	OVC	OV	395.238	6.70712	265.728	5.88166	1.15256	5.10312	3.34×10^-07	1.25×10^-05
TRINITY_DN60035_c0_g1	OVC	OV	158.524	0	105.683	21.4612	4.20651	5.10191	3.36×10^-07	1.25×10^-05
TRINITY_DN8644_c2_g1	OVC	OV	33.8901	0	22.5934	8.10837	1.58933	5.10174	3.37×10^-07	1.25×10^-05
TRINITY_DN7694_c2_g1	OVC	OV	149.472	0	99.6479	21.4553	4.20653	5.10047	3.39×10^-07	1.26×10^-05
TRINITY_DN33106_c0_g3	OVC	OV	65.8709	0	43.9139	9.05855	1.77605	5.10041	3.39×10^-07	1.26×10^-05
TRINITY_DN2986_c0_g1	OVC	OV	2013.81	97.191	1374.94	4.37312	0.857484	5.09995	3.40×10^-07	1.26×10^-05
TRINITY_DN3426_c6_g1	OVC	OV	17.9475	77.4229	37.7726	-2.10678	0.413143	-5.0994	3.41×10^-07	1.27×10^-05
TRINITY_DN78126_c3_g1	OVC	OV	152.152	0	101.435	21.4482	4.20653	5.09879	3.42×10^-07	1.27×10^-05
TRINITY_DN14921_c4_g1	OVC	OV	154.269	0	102.846	21.4427	4.20652	5.09749	3.44×10^-07	1.28×10^-05
TRINITY_DN106103_c0_g2	OVC	OV	152.317	0	101.545	21.4342	4.20653	5.09546	3.48×10^-07	1.29×10^-05
TRINITY_DN75350_c0_g1	OVC	OV	151.848	0	101.232	21.425	4.20653	5.09328	3.52×10^-07	1.30×10^-05
TRINITY_DN4424_c2_g1	OVC	OV	73.4863	166.126	104.366	-1.17975	0.231629	-5.09328	3.52×10^-07	1.30×10^-05
TRINITY_DN6796_c2_g1	OVC	OV	148.034	0	98.6893	21.423	4.20654	5.09279	3.53×10^-07	1.31×10^-05
TRINITY_DN5040_c1_g1	OVC	OV	32.0318	192.306	85.4566	-2.57422	0.505469	-5.09273	3.53×10^-07	1.31×10^-05
TRINITY_DN72814_c0_g1	OVC	OV	0	155.305	51.7682	-9.45946	1.85753	-5.09249	3.53×10^-07	1.31×10^-05
TRINITY_DN2978_c0_g1	OVC	OV	117.458	629.795	288.237	-2.42794	0.476778	-5.09239	3.54×10^-07	1.31×10^-05
TRINITY_DN5434_c3_g1	OVC	OV	14.0783	80.7581	36.3049	-2.52687	0.496428	-5.0901	3.58×10^-07	1.32×10^-05
TRINITY_DN10465_c0_g1	OVC	OV	5516	1230.72	4087.57	2.16404	0.425215	5.08928	3.59×10^-07	1.33×10^-05
TRINITY_DN4799_c0_g1	OVC	OV	1132.08	234.072	832.742	2.27341	0.447145	5.08428	3.69×10^-07	1.36×10^-05
TRINITY_DN21648_c8_g1	OVC	OV	0	128.673	42.8909	-9.18806	1.80726	-5.08397	3.70×10^-07	1.36×10^-05
TRINITY_DN4814_c0_g2	OVC	OV	0	128.673	42.8909	-9.18806	1.80726	-5.08397	3.70×10^-07	1.36×10^-05
TRINITY_DN19653_c0_g1	OVC	OV	1057.54	269.767	794.946	1.97121	0.387744	5.08379	3.70×10^-07	1.36×10^-05
TRINITY_DN23307_c1_g1	OVC	OV	0.689379	59.5988	20.3259	-6.62063	1.30311	-5.08063	3.76×10^-07	1.39×10^-05
TRINITY_DN4207_c5_g1	OVC	OV	150.256	0	100.171	21.3674	4.20653	5.07958	3.78×10^-07	1.39×10^-05
TRINITY_DN14587_c0_g1	OVC	OV	18824.3	4927.9	14192.2	1.93351	0.380786	5.07768	3.82×10^-07	1.41×10^-05
TRINITY_DN23_c5_g1	OVC	OV	647.753	262.824	519.443	1.29986	0.25615	5.07461	3.88×10^-07	1.43×10^-05
TRINITY_DN78120_c0_g1	OVC	OV	0	146.061	48.6871	-9.37092	1.847	-5.0736	3.90×10^-07	1.43×10^-05
TRINITY_DN17239_c0_g2	OVC	OV	0	148.332	49.4441	-9.3932	1.85177	-5.07256	3.92×10^-07	1.44×10^-05
TRINITY_DN106832_c0_g1	OVC	OV	2.56454	425.623	143.584	-7.35543	1.45014	-5.07222	3.93×10^-07	1.44×10^-05
TRINITY_DN1411_c0_g1	OVC	OV	943.413	119.824	668.883	2.97648	0.586821	5.07221	3.93×10^-07	1.44×10^-05
TRINITY_DN2743_c2_g1	OVC	OV	41.6217	8.03975	30.4277	2.37883	0.469043	5.07168	3.94×10^-07	1.45×10^-05
TRINITY_DN1743_c5_g1	OVC	OV	14.6978	84.6299	38.0085	-2.52182	0.49746	-5.0694	3.99×10^-07	1.46×10^-05
TRINITY_DN2515_c3_g1	OVC	OV	717.851	224.34	553.347	1.67892	0.331249	5.06846	4.01×10^-07	1.47×10^-05
TRINITY_DN870_c0_g1	OVC	OV	3148.98	1071.19	2456.38	1.55584	0.307027	5.06744	4.03×10^-07	1.47×10^-05
TRINITY_DN4728_c0_g1	OVC	OV	60.7853	195.524	105.698	-1.6973	0.33498	-5.06687	4.04×10^-07	1.48×10^-05
TRINITY_DN8300_c4_g1	OVC	OV	0	162.565	54.1882	-9.52537	1.87997	-5.06677	4.05×10^-07	1.48×10^-05
TRINITY_DN5073_c2_g1	OVC	OV	8.25392	150.58	55.6958	-4.20526	0.83024	-5.06512	4.08×10^-07	1.49×10^-05
TRINITY_DN3213_c2_g1	OVC	OV	463.787	93.4511	340.342	2.31232	0.456651	5.06366	4.11×10^-07	1.50×10^-05
TRINITY_DN8802_c1_g2	OVC	OV	71.101	153.676	98.626	-1.11021	0.219337	-5.06164	4.16×10^-07	1.51×10^-05
TRINITY_DN19955_c2_g1	OVC	OV	1.09447	90.0719	30.7536	-6.28699	1.24256	-5.05971	4.20×10^-07	1.53×10^-05
TRINITY_DN3881_c6_g1	OVC	OV	0	157.944	52.6478	-9.48375	1.87528	-5.05725	4.25×10^-07	1.55×10^-05
TRINITY_DN481_c1_g3	OVC	OV	108.89	1503.98	573.921	-3.78904	0.7495	-5.05543	4.29×10^-07	1.56×10^-05
TRINITY_DN5995_c0_g2	OVC	OV	33.8271	0	22.5514	8.09789	1.6019	5.05518	4.30×10^-07	1.56×10^-05
TRINITY_DN12165_c3_g3	OVC	OV	0	379.522	126.507	-10.7485	2.12643	-5.05474	4.31×10^-07	1.57×10^-05
TRINITY_DN9053_c3_g1	OVC	OV	0.283987	60.2615	20.2765	-7.37235	1.45854	-5.0546	4.31×10^-07	1.57×10^-05
TRINITY_DN13447_c0_g1	OVC	OV	0.24251	70.8199	23.7683	-7.6053	1.50476	-5.05415	4.32×10^-07	1.57×10^-05
TRINITY_DN1703_c3_g1	OVC	OV	48.7332	9.04105	35.5025	2.42534	0.479906	5.05379	4.33×10^-07	1.57×10^-05
TRINITY_DN9489_c0_g1	OVC	OV	77.0305	12.7076	55.5895	2.59875	0.514218	5.05379	4.33×10^-07	1.57×10^-05
TRINITY_DN1262_c0_g3	OVC	OV	104.936	312.76	174.211	-1.57845	0.312347	-5.05352	4.34×10^-07	1.57×10^-05
TRINITY_DN14700_c0_g1	OVC	OV	4.09117	47.3032	18.4952	-3.52292	0.697144	-5.05337	4.34×10^-07	1.57×10^-05
TRINITY_DN1549_c14_g1	OVC	OV	0	227.592	75.864	-10.0108	1.98167	-5.05169	4.38×10^-07	1.59×10^-05
TRINITY_DN1231_c0_g2	OVC	OV	66.5542	2852.95	995.352	-5.41852	1.073	-5.04989	4.42×10^-07	1.60×10^-05
TRINITY_DN6064_c0_g1	OVC	OV	536.754	83.7547	385.754	2.67895	0.530531	5.04956	4.43×10^-07	1.60×10^-05
TRINITY_DN56231_c0_g1	OVC	OV	139.936	0	93.2908	21.2385	4.20657	5.04889	4.44×10^-07	1.61×10^-05
TRINITY_DN1088_c4_g1	OVC	OV	0	261.764	87.2546	-10.2126	2.02305	-5.04811	4.46×10^-07	1.61×10^-05
TRINITY_DN2679_c9_g1	OVC	OV	0	261.764	87.2546	-10.2126	2.02305	-5.04811	4.46×10^-07	1.61×10^-05
TRINITY_DN12705_c0_g2	OVC	OV	2869.47	27.9632	1922.3	6.68096	1.32349	5.04798	4.47×10^-07	1.61×10^-05
TRINITY_DN16840_c2_g1	OVC	OV	0	126.309	42.1031	-9.16132	1.81523	-5.04692	4.49×10^-07	1.62×10^-05
TRINITY_DN1345_c2_g1	OVC	OV	99.685	3514.13	1237.83	-5.14175	1.0197	-5.0424	4.60×10^-07	1.66×10^-05
TRINITY_DN8670_c7_g1	OVC	OV	132.9	0	88.6001	21.2112	4.2066	5.04237	4.60×10^-07	1.66×10^-05
TRINITY_DN5123_c0_g1	OVC	OV	2804.44	771.979	2126.95	1.86096	0.36922	5.04025	4.65×10^-07	1.67×10^-05
TRINITY_DN13171_c0_g2	OVC	OV	76.4518	10.0497	54.3178	2.92183	0.579936	5.0382	4.70×10^-07	1.69×10^-05
TRINITY_DN18295_c2_g1	OVC	OV	16.4631	89.9253	40.9505	-2.46586	0.489501	-5.03751	4.72×10^-07	1.70×10^-05
TRINITY_DN23008_c1_g2	OVC	OV	6.76876	64.8546	26.1307	-3.28697	0.652541	-5.03718	4.72×10^-07	1.70×10^-05
TRINITY_DN26793_c3_g1	OVC	OV	0	125.993	41.9976	-9.15769	1.81825	-5.03653	4.74×10^-07	1.70×10^-05
TRINITY_DN9626_c2_g1	OVC	OV	0	125.993	41.9976	-9.15769	1.81825	-5.03653	4.74×10^-07	1.70×10^-05
TRINITY_DN14596_c0_g1	OVC	OV	42.3305	173.082	85.9143	-2.01925	0.401133	-5.03387	4.81×10^-07	1.72×10^-05
TRINITY_DN7832_c0_g1	OVC	OV	7.26258	56.6536	23.7262	-2.97953	0.592021	-5.03281	4.83×10^-07	1.73×10^-05
TRINITY_DN4953_c0_g2	OVC	OV	96.5267	6.39046	66.4813	3.91613	0.778613	5.02963	4.91×10^-07	1.76×10^-05
TRINITY_DN3487_c2_g1	OVC	OV	0	140.358	46.7862	-9.31348	1.85178	-5.02946	4.92×10^-07	1.76×10^-05
TRINITY_DN14489_c1_g4	OVC	OV	0	127.053	42.3509	-9.16978	1.82323	-5.02941	4.92×10^-07	1.76×10^-05
TRINITY_DN439_c1_g2	OVC	OV	1037.76	263.597	779.705	1.9769	0.393152	5.02833	4.95×10^-07	1.77×10^-05
TRINITY_DN13414_c0_g1	OVC	OV	127.622	0	85.0816	21.1517	4.20662	5.02819	4.95×10^-07	1.77×10^-05
TRINITY_DN90862_c0_g1	OVC	OV	0	125.669	41.8896	-9.15398	1.82099	-5.02693	4.98×10^-07	1.78×10^-05
TRINITY_DN3340_c0_g1	OVC	OV	220.689	545.211	328.863	-1.30871	0.260372	-5.0263	5.00×10^-07	1.79×10^-05
TRINITY_DN3677_c3_g1	OVC	OV	2.69644	41.59	15.661	-3.95976	0.78793	-5.02552	5.02×10^-07	1.79×10^-05
TRINITY_DN1897_c1_g4	OVC	OV	45.8434	0	30.5622	8.54101	1.70006	5.02395	5.06×10^-07	1.80×10^-05
TRINITY_DN9085_c0_g1	OVC	OV	0	136.94	45.6465	-9.27788	1.84689	-5.02351	5.07×10^-07	1.81×10^-05
TRINITY_DN89347_c0_g1	OVC	OV	90.0877	9.35772	63.1777	3.26975	0.651043	5.02233	5.10×10^-07	1.82×10^-05
TRINITY_DN5257_c1_g2	OVC	OV	127.247	0	84.8315	21.1255	4.20662	5.02197	5.11×10^-07	1.82×10^-05
TRINITY_DN20000_c0_g2	OVC	OV	79.2797	15.7042	58.0879	2.33401	0.464786	5.02168	5.12×10^-07	1.82×10^-05
TRINITY_DN7590_c0_g2	OVC	OV	51.7364	15.0855	39.5195	1.77934	0.354365	5.02119	5.14×10^-07	1.83×10^-05
TRINITY_DN20152_c0_g2	OVC	OV	25.8579	186.968	79.5613	-2.83998	0.565647	-5.02076	5.15×10^-07	1.83×10^-05
TRINITY_DN1332_c5_g1	OVC	OV	147.047	1.67861	98.5906	6.45534	1.28577	5.02061	5.15×10^-07	1.83×10^-05
TRINITY_DN4288_c0_g1	OVC	OV	19.0907	80.0589	39.4134	-2.06169	0.410722	-5.01966	5.18×10^-07	1.84×10^-05
TRINITY_DN598_c0_g1	OVC	OV	254.207	77.7103	195.374	1.70696	0.340187	5.0177	5.23×10^-07	1.86×10^-05
TRINITY_DN5229_c0_g3	OVC	OV	47.3815	0	31.5877	8.59009	1.71197	5.01766	5.23×10^-07	1.86×10^-05
TRINITY_DN124528_c0_g1	OVC	OV	6.70178	52.899	22.1009	-2.97141	0.592307	-5.01668	5.26×10^-07	1.86×10^-05
TRINITY_DN16839_c1_g2	OVC	OV	0	303.531	101.177	-10.4262	2.07857	-5.01604	5.27×10^-07	1.87×10^-05
TRINITY_DN18684_c1_g1	OVC	OV	122.024	6.39046	83.4798	4.25727	0.848817	5.01553	5.29×10^-07	1.87×10^-05
TRINITY_DN12214_c1_g1	OVC	OV	32.1515	0	21.4343	8.02958	1.60097	5.01545	5.29×10^-07	1.87×10^-05
TRINITY_DN17383_c0_g1	OVC	OV	0	141.357	47.1189	-9.32368	1.85909	-5.01518	5.30×10^-07	1.87×10^-05
TRINITY_DN26677_c1_g1	OVC	OV	0	141.357	47.1189	-9.32368	1.85909	-5.01518	5.30×10^-07	1.87×10^-05
TRINITY_DN43897_c0_g3	OVC	OV	0	141.357	47.1189	-9.32368	1.85909	-5.01518	5.30×10^-07	1.87×10^-05
TRINITY_DN65078_c0_g1	OVC	OV	0	141.357	47.1189	-9.32368	1.85909	-5.01518	5.30×10^-07	1.87×10^-05
TRINITY_DN10333_c0_g1	OVC	OV	1.54423	65.5553	22.8813	-5.44461	1.08572	-5.01475	5.31×10^-07	1.88×10^-05
TRINITY_DN3478_c0_g1	OVC	OV	389.136	18.7741	265.682	4.37447	0.872349	5.01459	5.31×10^-07	1.88×10^-05
TRINITY_DN19953_c0_g2	OVC	OV	24.6379	345.728	131.668	-3.80933	0.75977	-5.0138	5.34×10^-07	1.88×10^-05
TRINITY_DN19154_c0_g2	OVC	OV	42.2919	410.038	164.874	-3.2672	0.652041	-5.01073	5.42×10^-07	1.91×10^-05
TRINITY_DN38156_c1_g1	OVC	OV	0	127.473	42.4911	-9.17456	1.83201	-5.00791	5.50×10^-07	1.94×10^-05
TRINITY_DN63033_c3_g1	OVC	OV	0	153.894	51.2981	-9.44628	1.88652	-5.00726	5.52×10^-07	1.95×10^-05
TRINITY_DN41240_c1_g1	OVC	OV	10.0495	82.8209	34.3066	-3.06068	0.611349	-5.00643	5.54×10^-07	1.95×10^-05
TRINITY_DN3503_c0_g1	OVC	OV	3339.01	1182.38	2620.13	1.49743	0.29915	5.00562	5.57×10^-07	1.96×10^-05
TRINITY_DN69280_c1_g2	OVC	OV	6.36367	84.6681	32.4651	-3.77679	0.754618	-5.0049	5.59×10^-07	1.96×10^-05
TRINITY_DN605_c2_g1	OVC	OV	983.408	366.885	777.901	1.4215	0.284023	5.00486	5.59×10^-07	1.96×10^-05
TRINITY_DN29878_c5_g1	OVC	OV	0	129.136	43.0453	-9.19324	1.83721	-5.00391	5.62×10^-07	1.97×10^-05
TRINITY_DN1568_c4_g1	OVC	OV	0	172.52	57.5068	-9.6111	1.92075	-5.00383	5.62×10^-07	1.97×10^-05
TRINITY_DN8612_c0_g1	OVC	OV	0	172.52	57.5068	-9.6111	1.92075	-5.00383	5.62×10^-07	1.97×10^-05
TRINITY_DN2831_c3_g1	OVC	OV	29.9519	86.096	48.6666	-1.51815	0.303504	-5.00208	5.67×10^-07	1.99×10^-05
TRINITY_DN7590_c1_g1	OVC	OV	596.756	209.099	467.537	1.51337	0.302581	5.00152	5.69×10^-07	1.99×10^-05
TRINITY_DN14542_c0_g1	OVC	OV	395.861	171.831	321.185	1.20415	0.240761	5.00141	5.69×10^-07	1.99×10^-05
TRINITY_DN10008_c0_g1	OVC	OV	3346.48	607.504	2433.49	2.46186	0.49232	5.00052	5.72×10^-07	2.00×10^-05
TRINITY_DN1726_c2_g1	OVC	OV	30.211	104.458	54.96	-1.79159	0.358515	-4.99725	5.82×10^-07	2.04×10^-05
TRINITY_DN1907_c1_g1	OVC	OV	3449.85	484.421	2461.37	2.83224	0.566772	4.99715	5.82×10^-07	2.04×10^-05
TRINITY_DN37797_c0_g1	OVC	OV	38.644	0	25.7626	8.29048	1.6591	4.99696	5.82×10^-07	2.04×10^-05
TRINITY_DN14966_c0_g2	OVC	OV	31.5885	2.00261	21.7265	3.97505	0.795719	4.99555	5.87×10^-07	2.05×10^-05
TRINITY_DN6389_c0_g1	OVC	OV	335.886	45.2566	239.01	2.89224	0.579057	4.99475	5.89×10^-07	2.06×10^-05
TRINITY_DN4048_c0_g1	OVC	OV	937.954	301.675	725.861	1.63719	0.327847	4.99376	5.92×10^-07	2.07×10^-05
TRINITY_DN46699_c0_g1	OVC	OV	0	250.986	83.6619	-10.1519	2.0335	-4.99235	5.96×10^-07	2.08×10^-05
TRINITY_DN5379_c4_g1	OVC	OV	0	250.986	83.6619	-10.1519	2.0335	-4.99235	5.96×10^-07	2.08×10^-05
TRINITY_DN3507_c6_g1	OVC	OV	0	289.579	96.5264	-10.3583	2.07493	-4.99212	5.97×10^-07	2.08×10^-05
TRINITY_DN4853_c4_g1	OVC	OV	0	289.579	96.5264	-10.3583	2.07493	-4.99212	5.97×10^-07	2.08×10^-05
TRINITY_DN22326_c2_g1	OVC	OV	1019.8	219.473	753.027	2.21676	0.444109	4.99147	5.99×10^-07	2.09×10^-05
TRINITY_DN29716_c0_g1	OVC	OV	2315.67	5.33784	1545.56	8.76063	1.75557	4.99018	6.03×10^-07	2.10×10^-05
TRINITY_DN1662_c0_g1	OVC	OV	2292.2	705.32	1763.24	1.70001	0.340709	4.98962	6.05×10^-07	2.10×10^-05
TRINITY_DN52409_c5_g1	OVC	OV	0	128.438	42.8127	-9.18543	1.84103	-4.98928	6.06×10^-07	2.11×10^-05
TRINITY_DN3940_c0_g1	OVC	OV	15812.4	6533.64	12719.5	1.27515	0.255675	4.98739	6.12×10^-07	2.12×10^-05
TRINITY_DN45008_c1_g2	OVC	OV	156.36	0	104.24	10.31	2.06816	4.9851	6.19×10^-07	2.15×10^-05
TRINITY_DN143_c0_g1	OVC	OV	653.541	2285.43	1197.5	-1.80716	0.362522	-4.98496	6.20×10^-07	2.15×10^-05
TRINITY_DN476_c3_g1	OVC	OV	905.211	86.1693	632.197	3.39247	0.68068	4.98395	6.23×10^-07	2.16×10^-05
TRINITY_DN11379_c4_g1	OVC	OV	0	122.606	40.8687	-9.11839	1.82989	-4.98302	6.26×10^-07	2.17×10^-05
TRINITY_DN7905_c0_g1	OVC	OV	20.8118	147.212	62.9452	-2.83399	0.568885	-4.98166	6.30×10^-07	2.18×10^-05
TRINITY_DN10587_c1_g1	OVC	OV	1.62127	53.2377	18.8267	-5.12571	1.02921	-4.98024	6.35×10^-07	2.20×10^-05
TRINITY_DN21432_c1_g1	OVC	OV	47.3751	0	31.5834	8.59022	1.72525	4.97912	6.39×10^-07	2.21×10^-05
TRINITY_DN2948_c0_g1	OVC	OV	2564.04	1118.4	2082.16	1.19704	0.240479	4.97772	6.43×10^-07	2.23×10^-05
TRINITY_DN18079_c2_g1	OVC	OV	0.24251	60.3788	20.2879	-7.37511	1.48171	-4.97743	6.44×10^-07	2.23×10^-05
TRINITY_DN3488_c0_g2	OVC	OV	968.677	0	645.784	12.9404	2.60055	4.97605	6.49×10^-07	2.24×10^-05
TRINITY_DN130517_c1_g2	OVC	OV	0	214.597	71.5324	-9.92598	1.99561	-4.97391	6.56×10^-07	2.27×10^-05
TRINITY_DN16750_c0_g1	OVC	OV	19.7334	87.4946	42.3205	-2.16223	0.43476	-4.97339	6.58×10^-07	2.27×10^-05
TRINITY_DN34811_c2_g2	OVC	OV	0	134.034	44.678	-9.24696	1.85984	-4.9719	6.63×10^-07	2.29×10^-05
TRINITY_DN3785_c0_g3	OVC	OV	98.4041	0	65.6027	9.64268	1.93958	4.97153	6.64×10^-07	2.29×10^-05
TRINITY_DN741_c0_g1	OVC	OV	1244.39	193.948	894.245	2.68167	0.539423	4.97136	6.65×10^-07	2.29×10^-05
TRINITY_DN11876_c0_g1	OVC	OV	55.6551	180.842	97.3839	-1.69477	0.340911	-4.97129	6.65×10^-07	2.29×10^-05
TRINITY_DN1830_c0_g2	OVC	OV	200.658	9.76967	137.029	4.36228	0.877994	4.96847	6.75×10^-07	2.32×10^-05
TRINITY_DN5737_c1_g1	OVC	OV	1123.91	524.306	924.042	1.09902	0.221277	4.96671	6.81×10^-07	2.34×10^-05
TRINITY_DN48251_c0_g1	OVC	OV	35.6485	0	23.7657	8.17729	1.64739	4.96378	6.91×10^-07	2.38×10^-05
TRINITY_DN1817_c8_g1	OVC	OV	70.658	7.36977	49.5619	3.25606	0.656016	4.96338	6.93×10^-07	2.38×10^-05
TRINITY_DN5021_c0_g2	OVC	OV	155.508	0.338655	103.785	8.8546	1.78409	4.96309	6.94×10^-07	2.38×10^-05
TRINITY_DN77627_c0_g1	OVC	OV	96.9766	6.02981	66.661	4.00324	0.806718	4.96238	6.96×10^-07	2.39×10^-05
TRINITY_DN6112_c5_g1	OVC	OV	222.049	28.1391	157.412	2.98177	0.600973	4.96157	6.99×10^-07	2.40×10^-05
TRINITY_DN26443_c0_g1	OVC	OV	94.2925	16.7861	68.457	2.49319	0.502798	4.95862	7.10×10^-07	2.43×10^-05
TRINITY_DN5241_c1_g1	OVC	OV	71.8557	246.803	130.171	-1.77477	0.357933	-4.95837	7.11×10^-07	2.44×10^-05
TRINITY_DN12075_c1_g3	OVC	OV	0	128.841	42.9471	-9.18994	1.85422	-4.95623	7.19×10^-07	2.46×10^-05
TRINITY_DN2200_c1_g1	OVC	OV	951.673	375.616	759.654	1.34175	0.270742	4.95584	7.20×10^-07	2.46×10^-05
TRINITY_DN5150_c18_g1	OVC	OV	44.3263	136.859	75.1705	-1.62844	0.3286	-4.9557	7.21×10^-07	2.46×10^-05
TRINITY_DN4776_c0_g4	OVC	OV	0	136.991	45.6636	-9.27842	1.87232	-4.95557	7.21×10^-07	2.46×10^-05
TRINITY_DN502_c0_g1	OVC	OV	1222.35	264.693	903.128	2.20749	0.445584	4.95415	7.26×10^-07	2.48×10^-05
TRINITY_DN21669_c0_g2	OVC	OV	0	178.417	59.4723	-9.65961	1.95059	-4.95214	7.34×10^-07	2.50×10^-05
TRINITY_DN32630_c0_g2	OVC	OV	0.689379	54.9383	18.7724	-6.5024	1.31333	-4.95108	7.38×10^-07	2.52×10^-05
TRINITY_DN40049_c0_g2	OVC	OV	149.505	36.4296	111.813	2.0397	0.412018	4.95052	7.40×10^-07	2.52×10^-05
TRINITY_DN301_c4_g1	OVC	OV	0	149.894	49.9645	-9.4083	1.90081	-4.94963	7.44×10^-07	2.53×10^-05
TRINITY_DN8799_c1_g1	OVC	OV	82.9023	877.136	347.647	-3.40646	0.688416	-4.94826	7.49×10^-07	2.55×10^-05
TRINITY_DN4827_c12_g1	OVC	OV	15.7809	162.576	64.7127	-3.37055	0.681285	-4.94734	7.52×10^-07	2.56×10^-05
TRINITY_DN13097_c4_g1	OVC	OV	0	120.964	40.3214	-9.09893	1.8394	-4.94667	7.55×10^-07	2.56×10^-05
TRINITY_DN2073_c1_g1	OVC	OV	0	120.964	40.3214	-9.09893	1.8394	-4.94667	7.55×10^-07	2.56×10^-05
TRINITY_DN2616_c14_g1	OVC	OV	0	120.964	40.3214	-9.09893	1.8394	-4.94667	7.55×10^-07	2.56×10^-05
TRINITY_DN33628_c0_g2	OVC	OV	0	120.964	40.3214	-9.09893	1.8394	-4.94667	7.55×10^-07	2.56×10^-05
TRINITY_DN71435_c1_g2	OVC	OV	30.4441	0	20.2961	7.94606	1.60643	4.94641	7.56×10^-07	2.57×10^-05
TRINITY_DN19617_c0_g1	OVC	OV	92.0593	10.3957	64.8381	3.1451	0.635887	4.946	7.58×10^-07	2.57×10^-05
TRINITY_DN6150_c1_g1	OVC	OV	243.537	1.0013	162.691	7.92486	1.60283	4.94429	7.64×10^-07	2.59×10^-05
TRINITY_DN27925_c0_g3	OVC	OV	0	121.186	40.3952	-9.10158	1.84087	-4.94416	7.65×10^-07	2.59×10^-05
TRINITY_DN19086_c0_g1	OVC	OV	0	165.791	55.2637	-9.5537	1.93259	-4.94348	7.67×10^-07	2.60×10^-05
TRINITY_DN23929_c0_g1	OVC	OV	59.4973	3.03323	40.6759	4.29377	0.868715	4.94267	7.71×10^-07	2.61×10^-05
TRINITY_DN2727_c0_g2	OVC	OV	17.5243	79.9636	38.3374	-2.18049	0.441166	-4.94256	7.71×10^-07	2.61×10^-05
TRINITY_DN332_c1_g2	OVC	OV	6.84507	53.2304	22.3068	-2.93312	0.593531	-4.94182	7.74×10^-07	2.62×10^-05
TRINITY_DN13048_c2_g1	OVC	OV	26.621	0	17.7473	7.75633	1.57024	4.93959	7.83×10^-07	2.65×10^-05
TRINITY_DN1983_c6_g1	OVC	OV	78.3751	0	52.25	9.31196	1.88521	4.93947	7.83×10^-07	2.65×10^-05
TRINITY_DN70617_c7_g1	OVC	OV	0	120.28	40.0932	-9.09074	1.84107	-4.93775	7.90×10^-07	2.67×10^-05
[truncated: 1,437 more rows]
